# Supplementary figures and images for: Chemoselectivity in the Cu-catalyzed O-arylation of phenols and aliphatic alcohols
Source: Royal Society of Chemistry journal article supplement (doi:10.1039/c1cc12694f), 2011-01-01

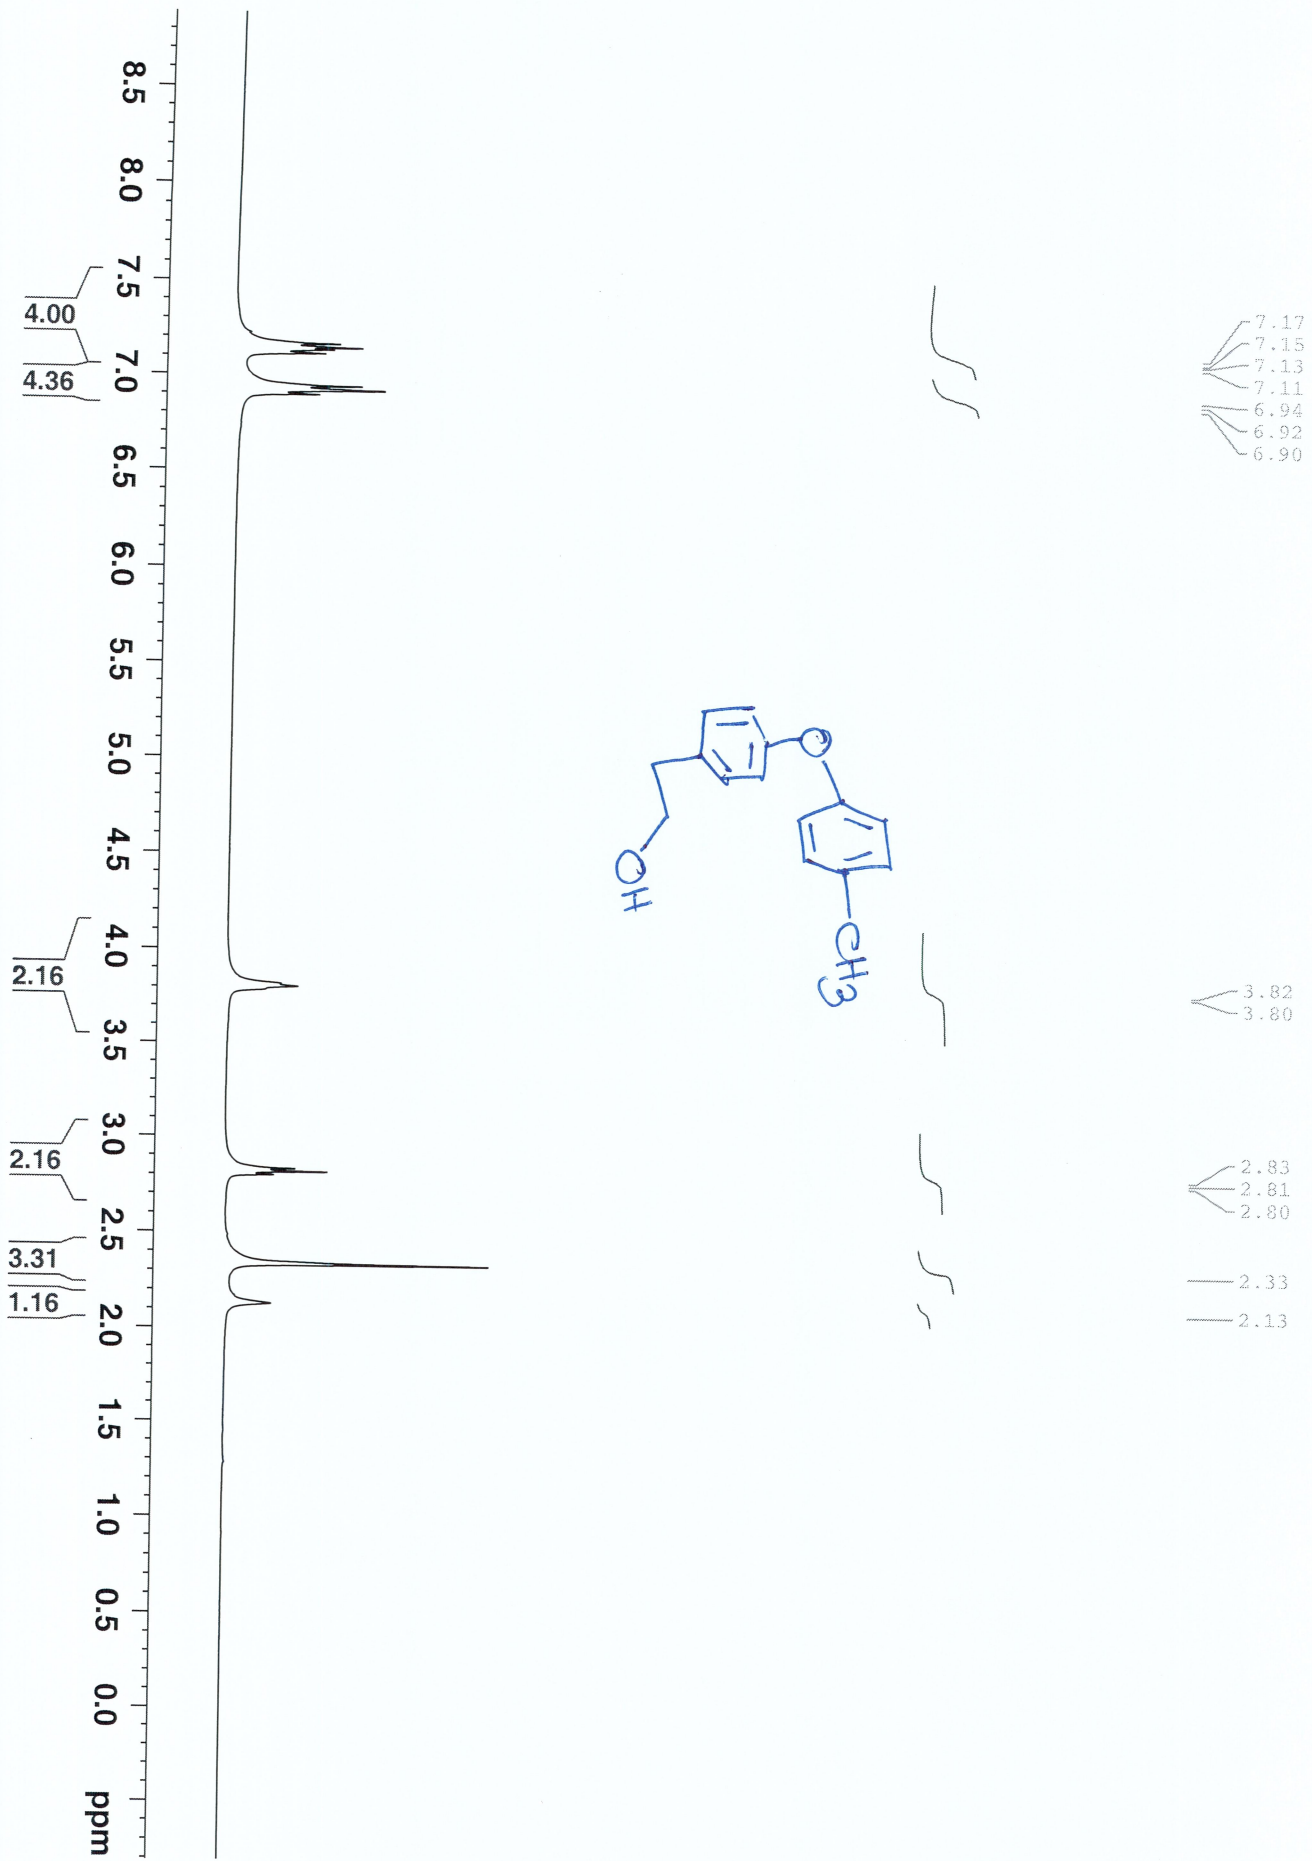

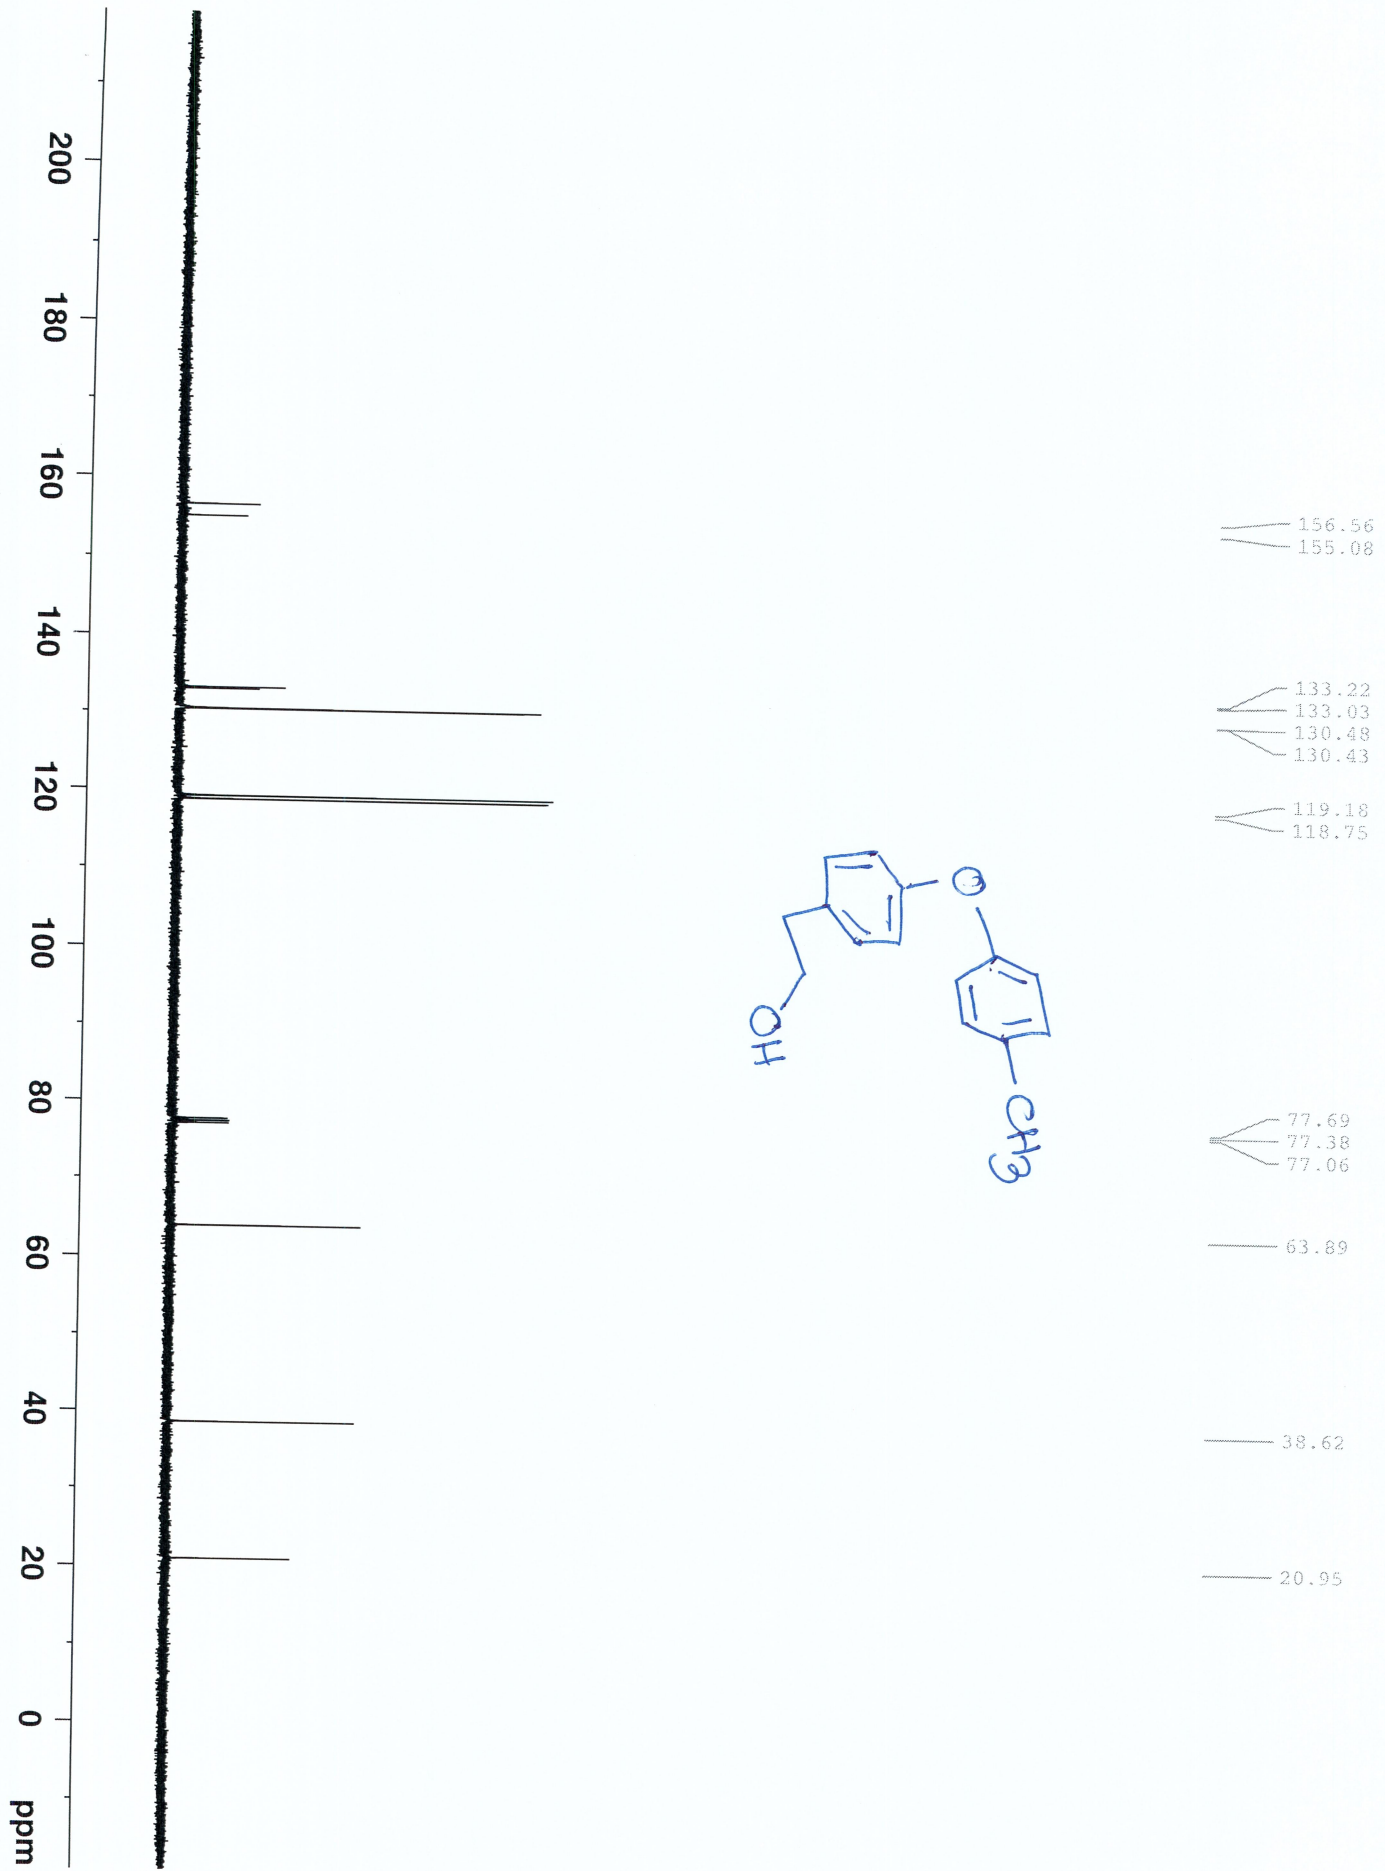



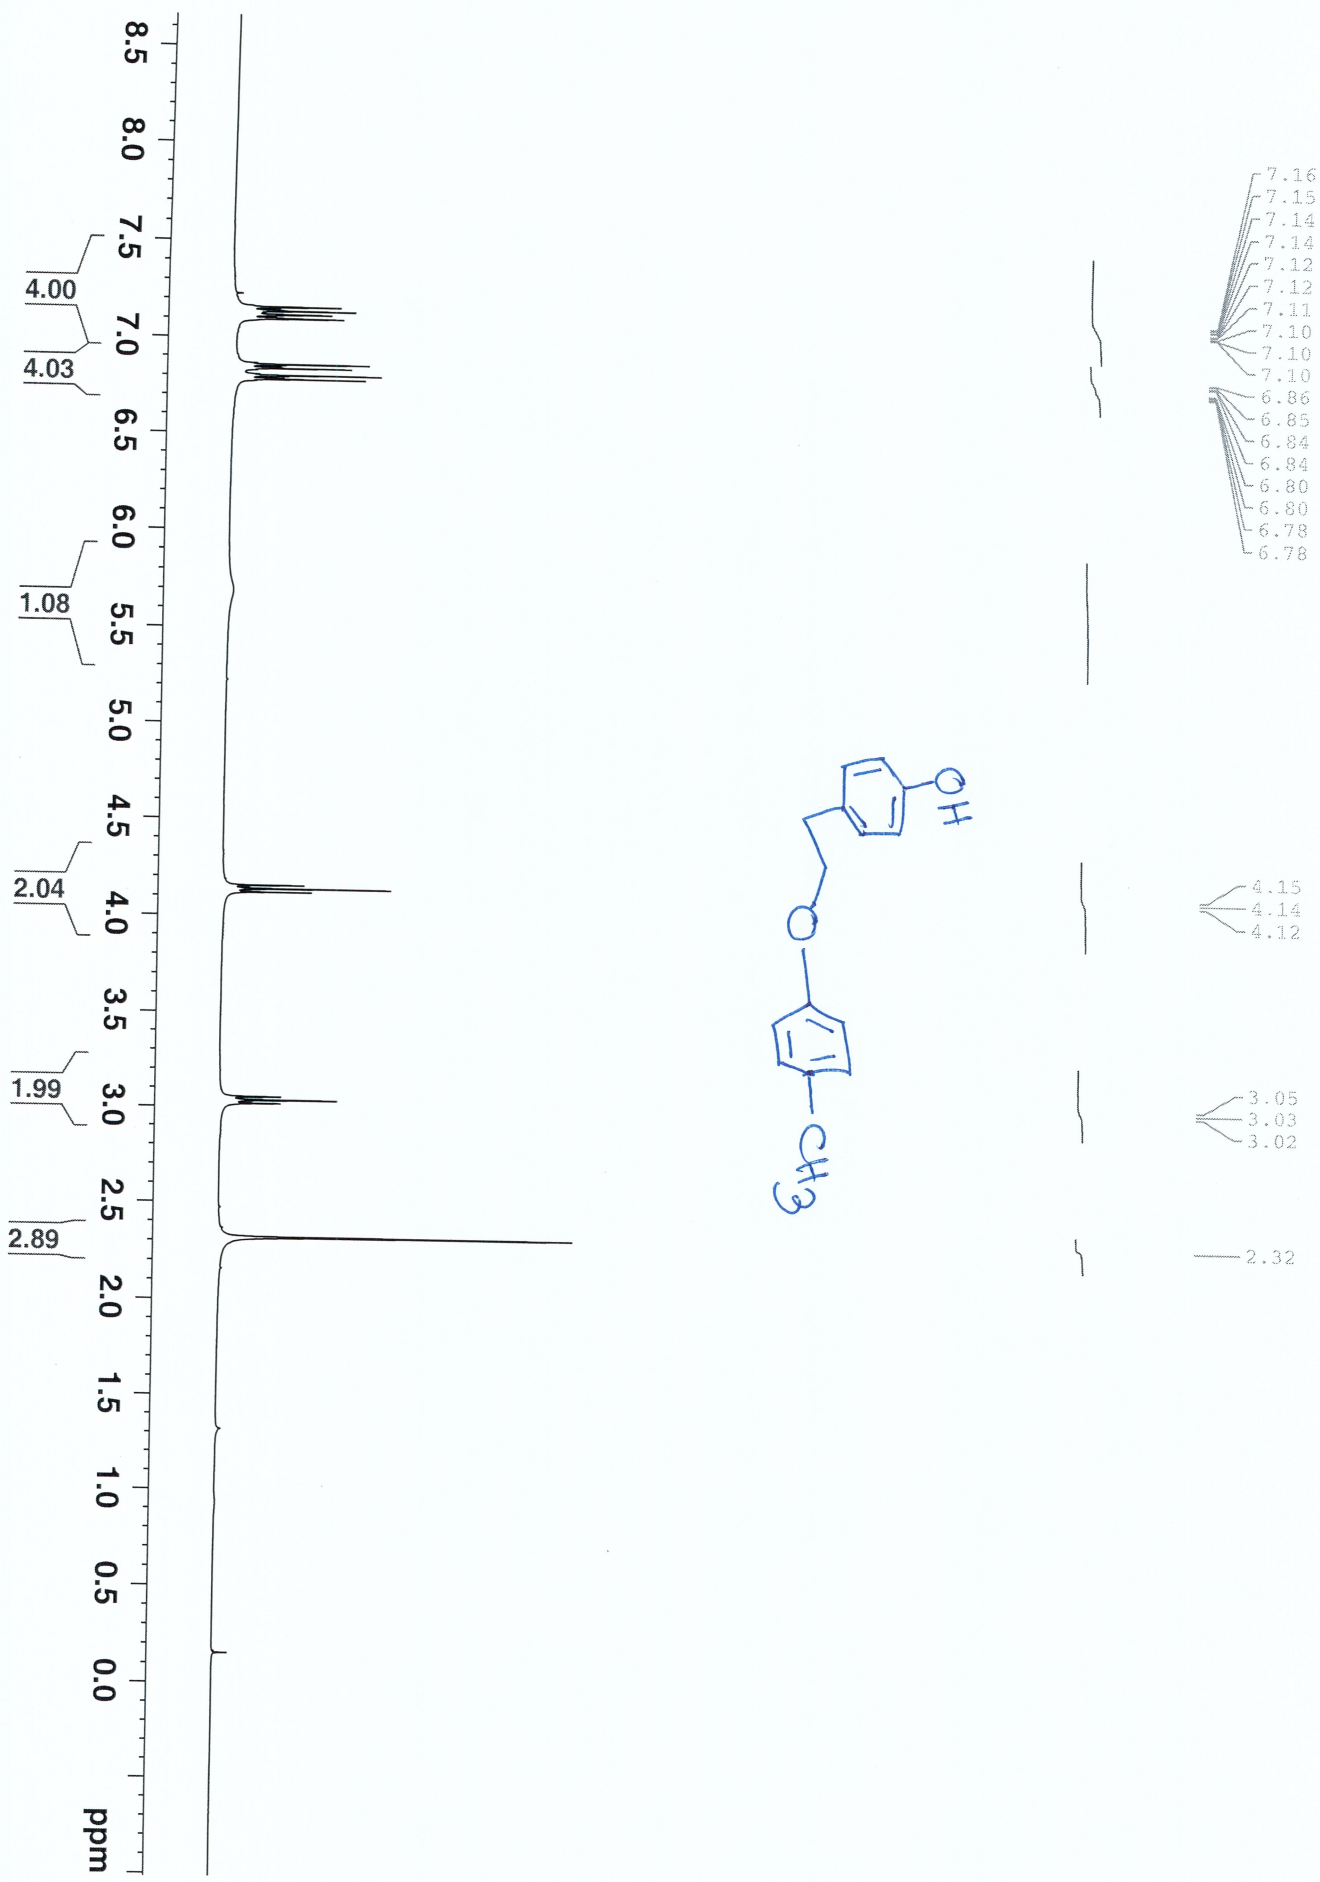

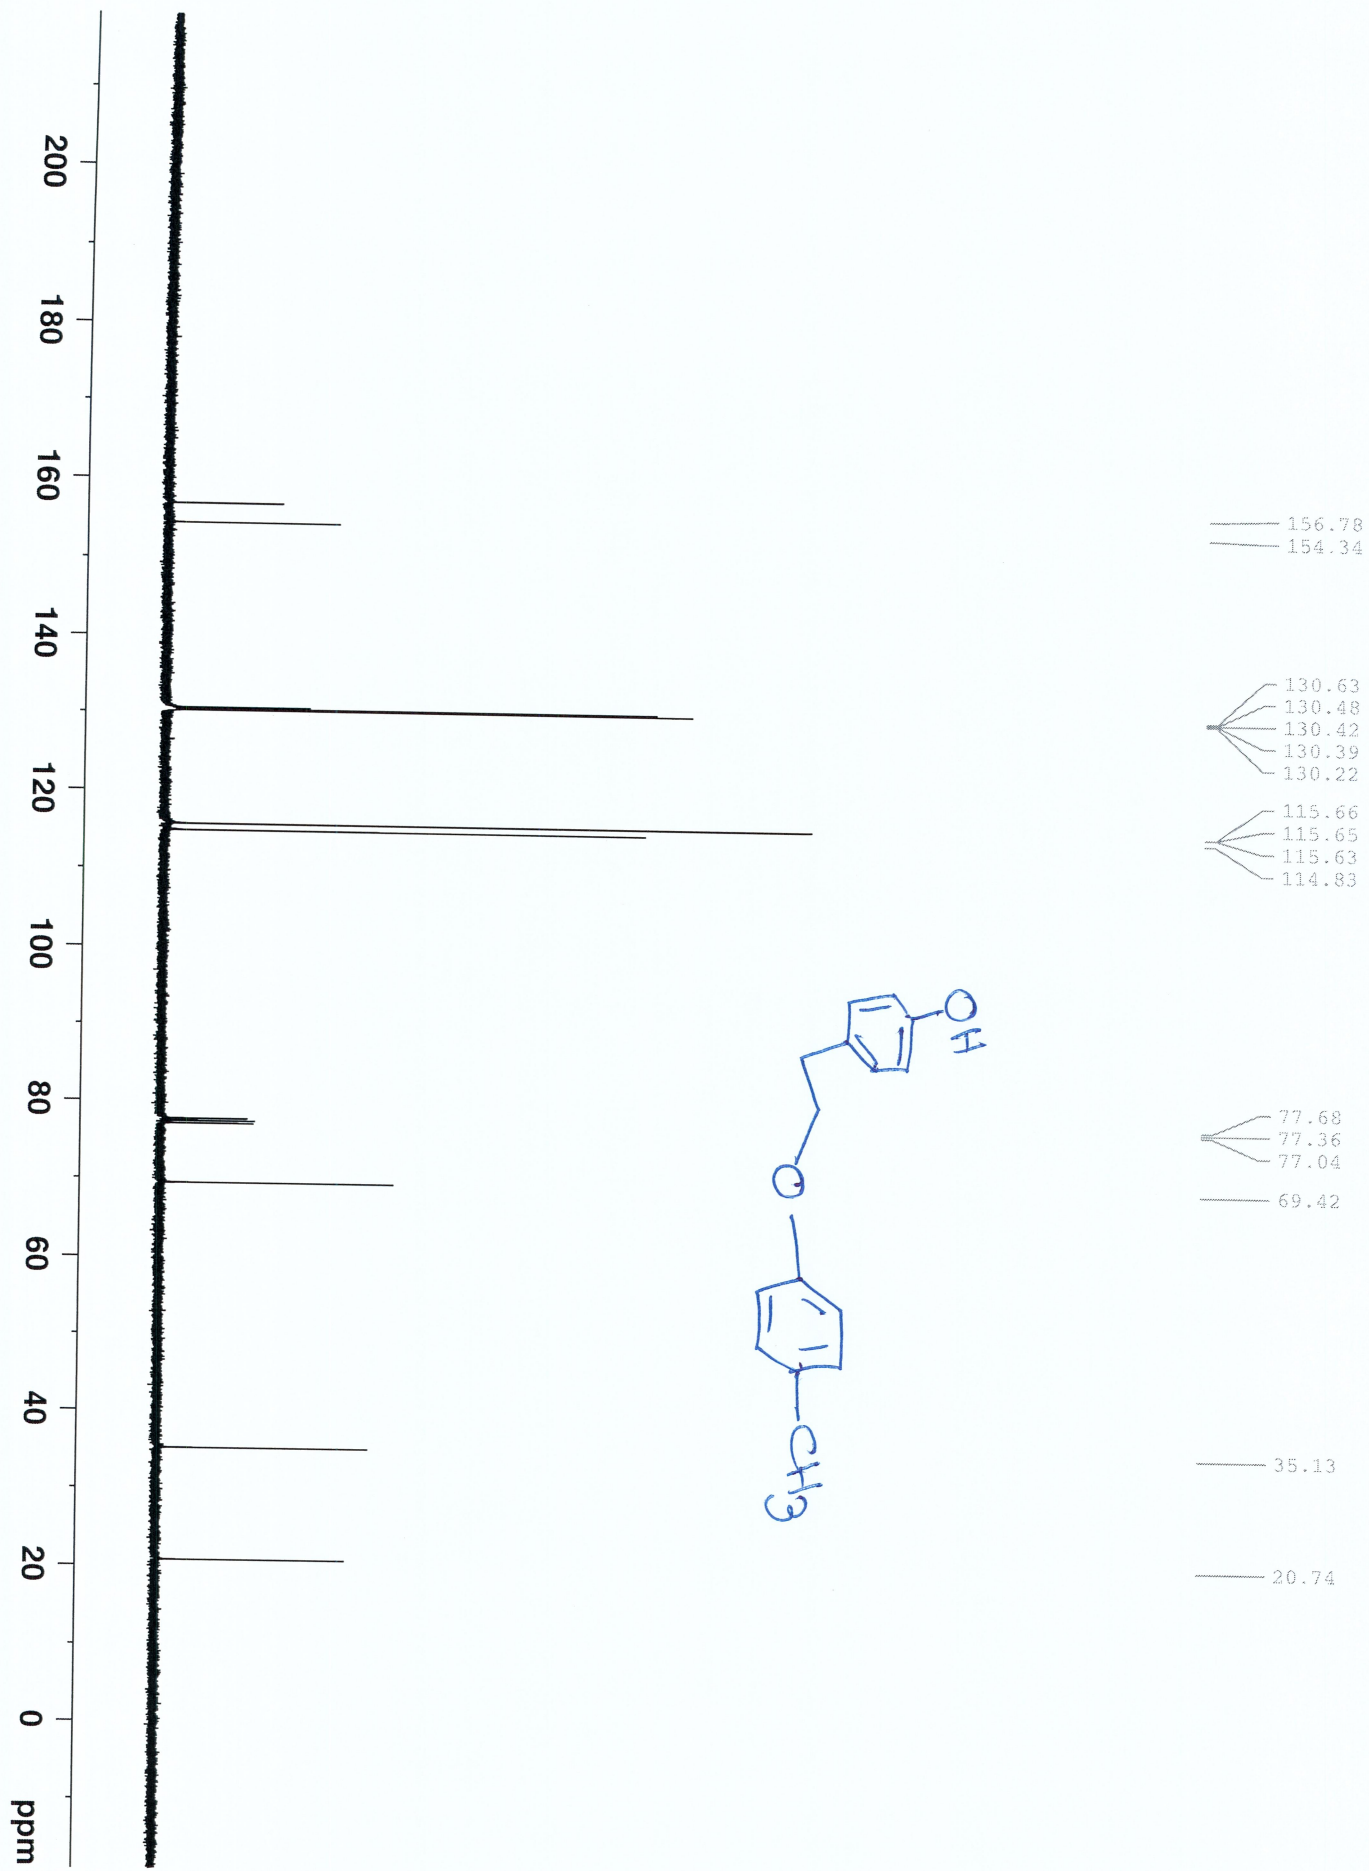

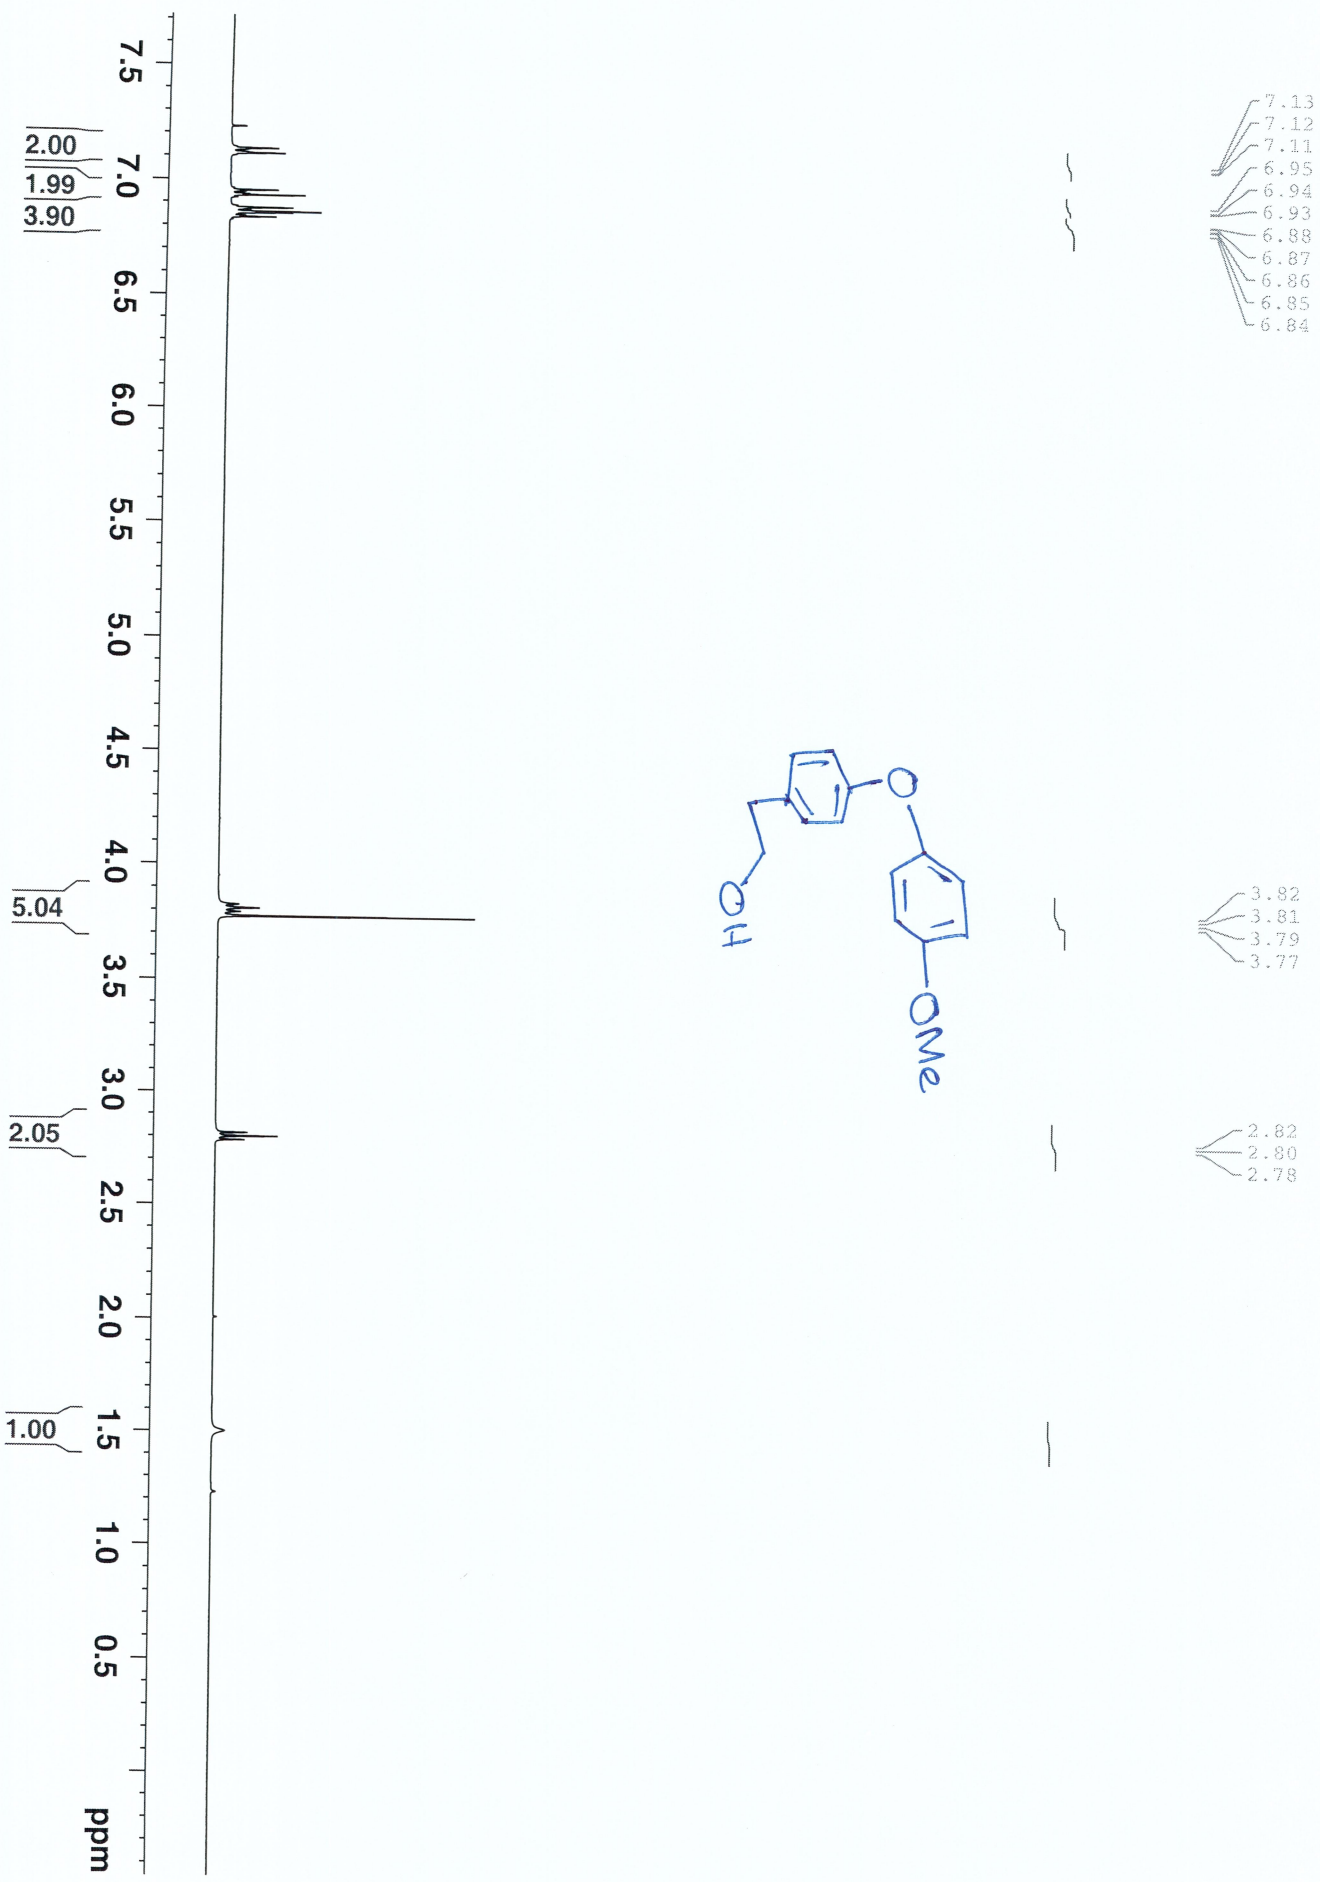



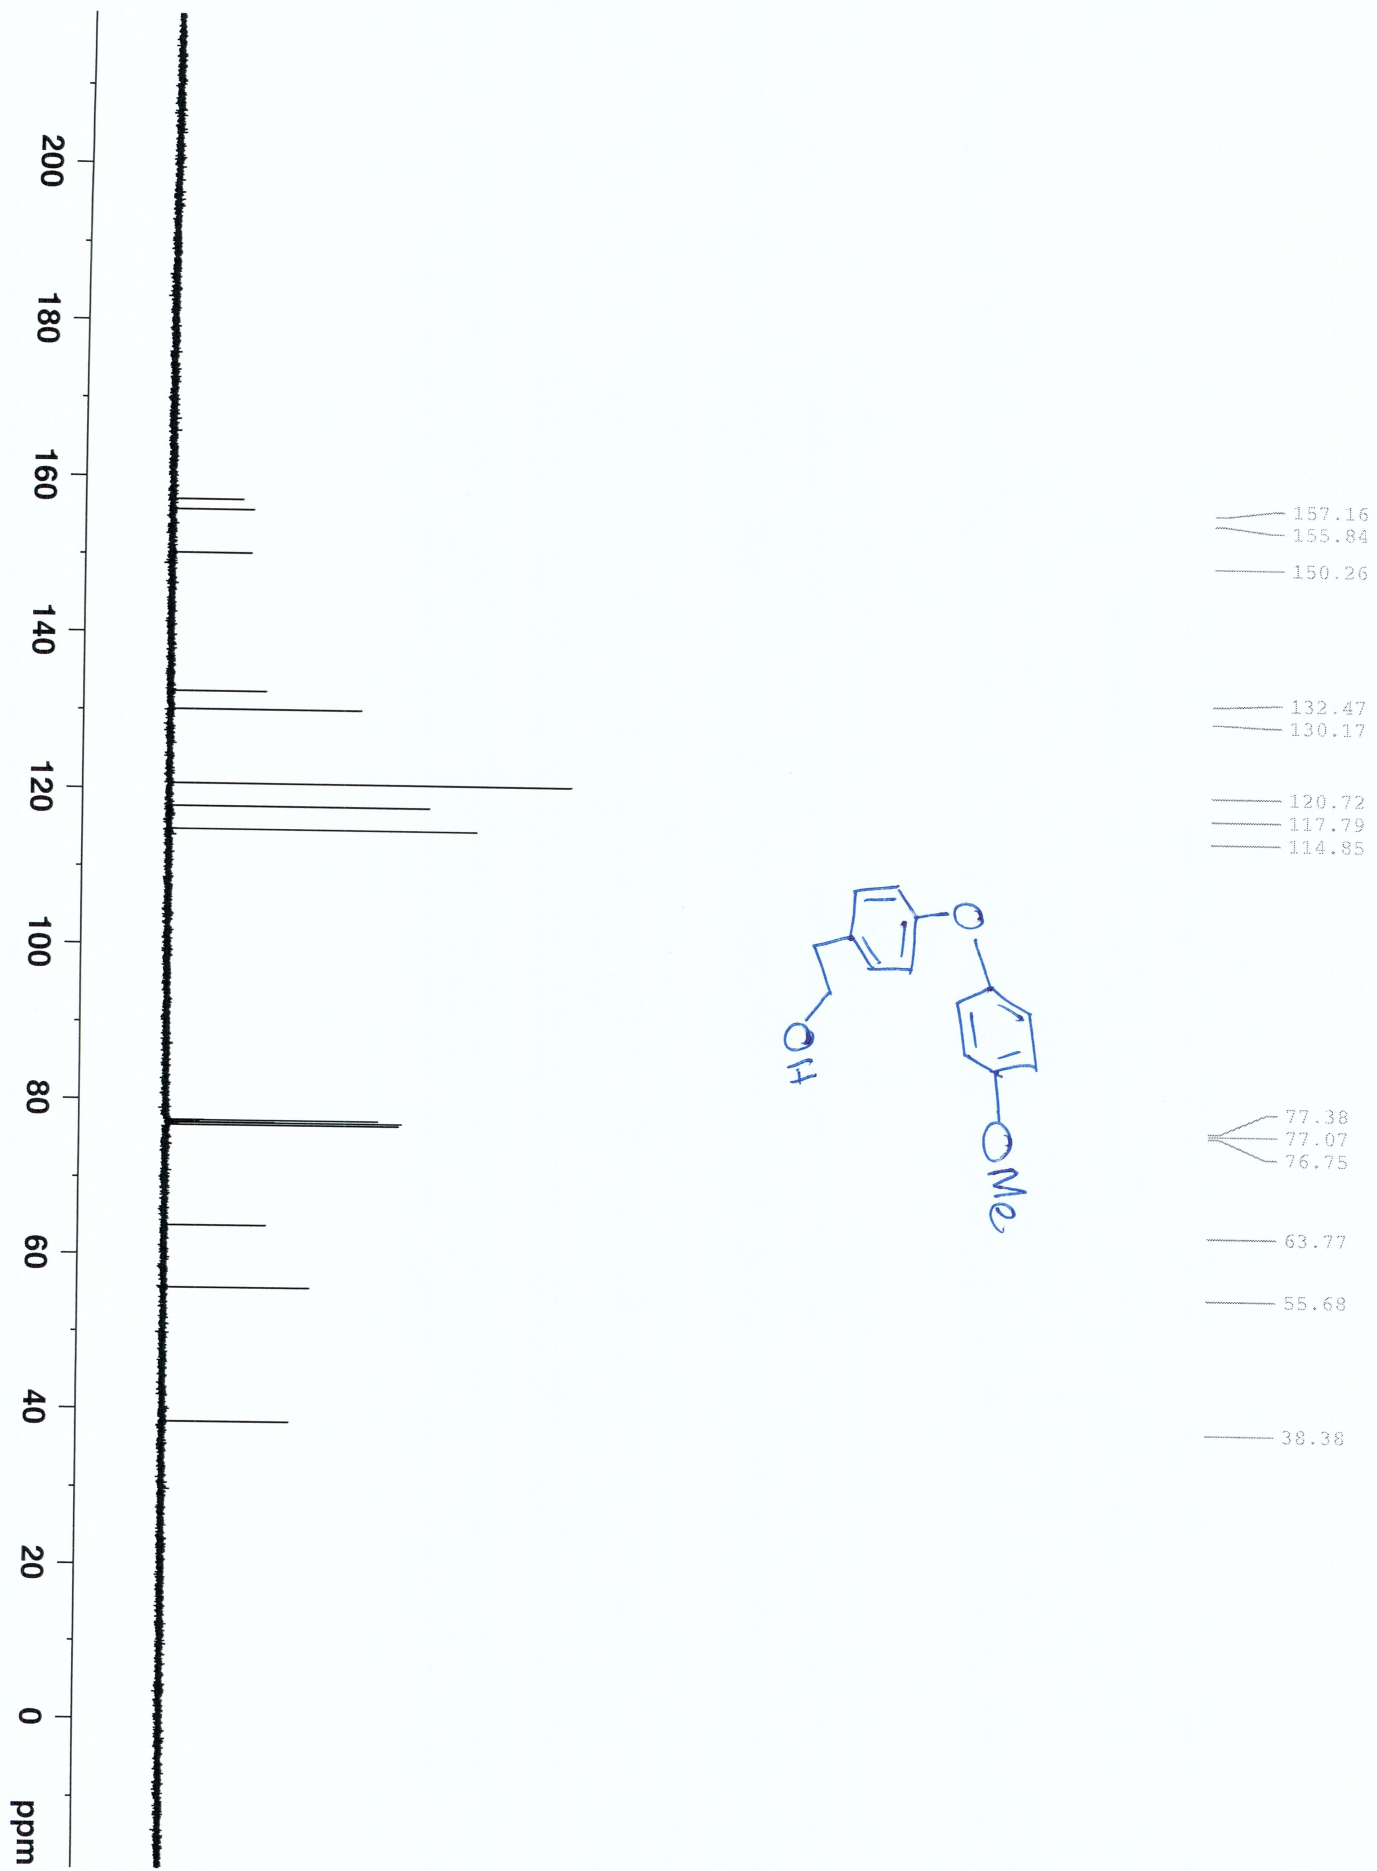

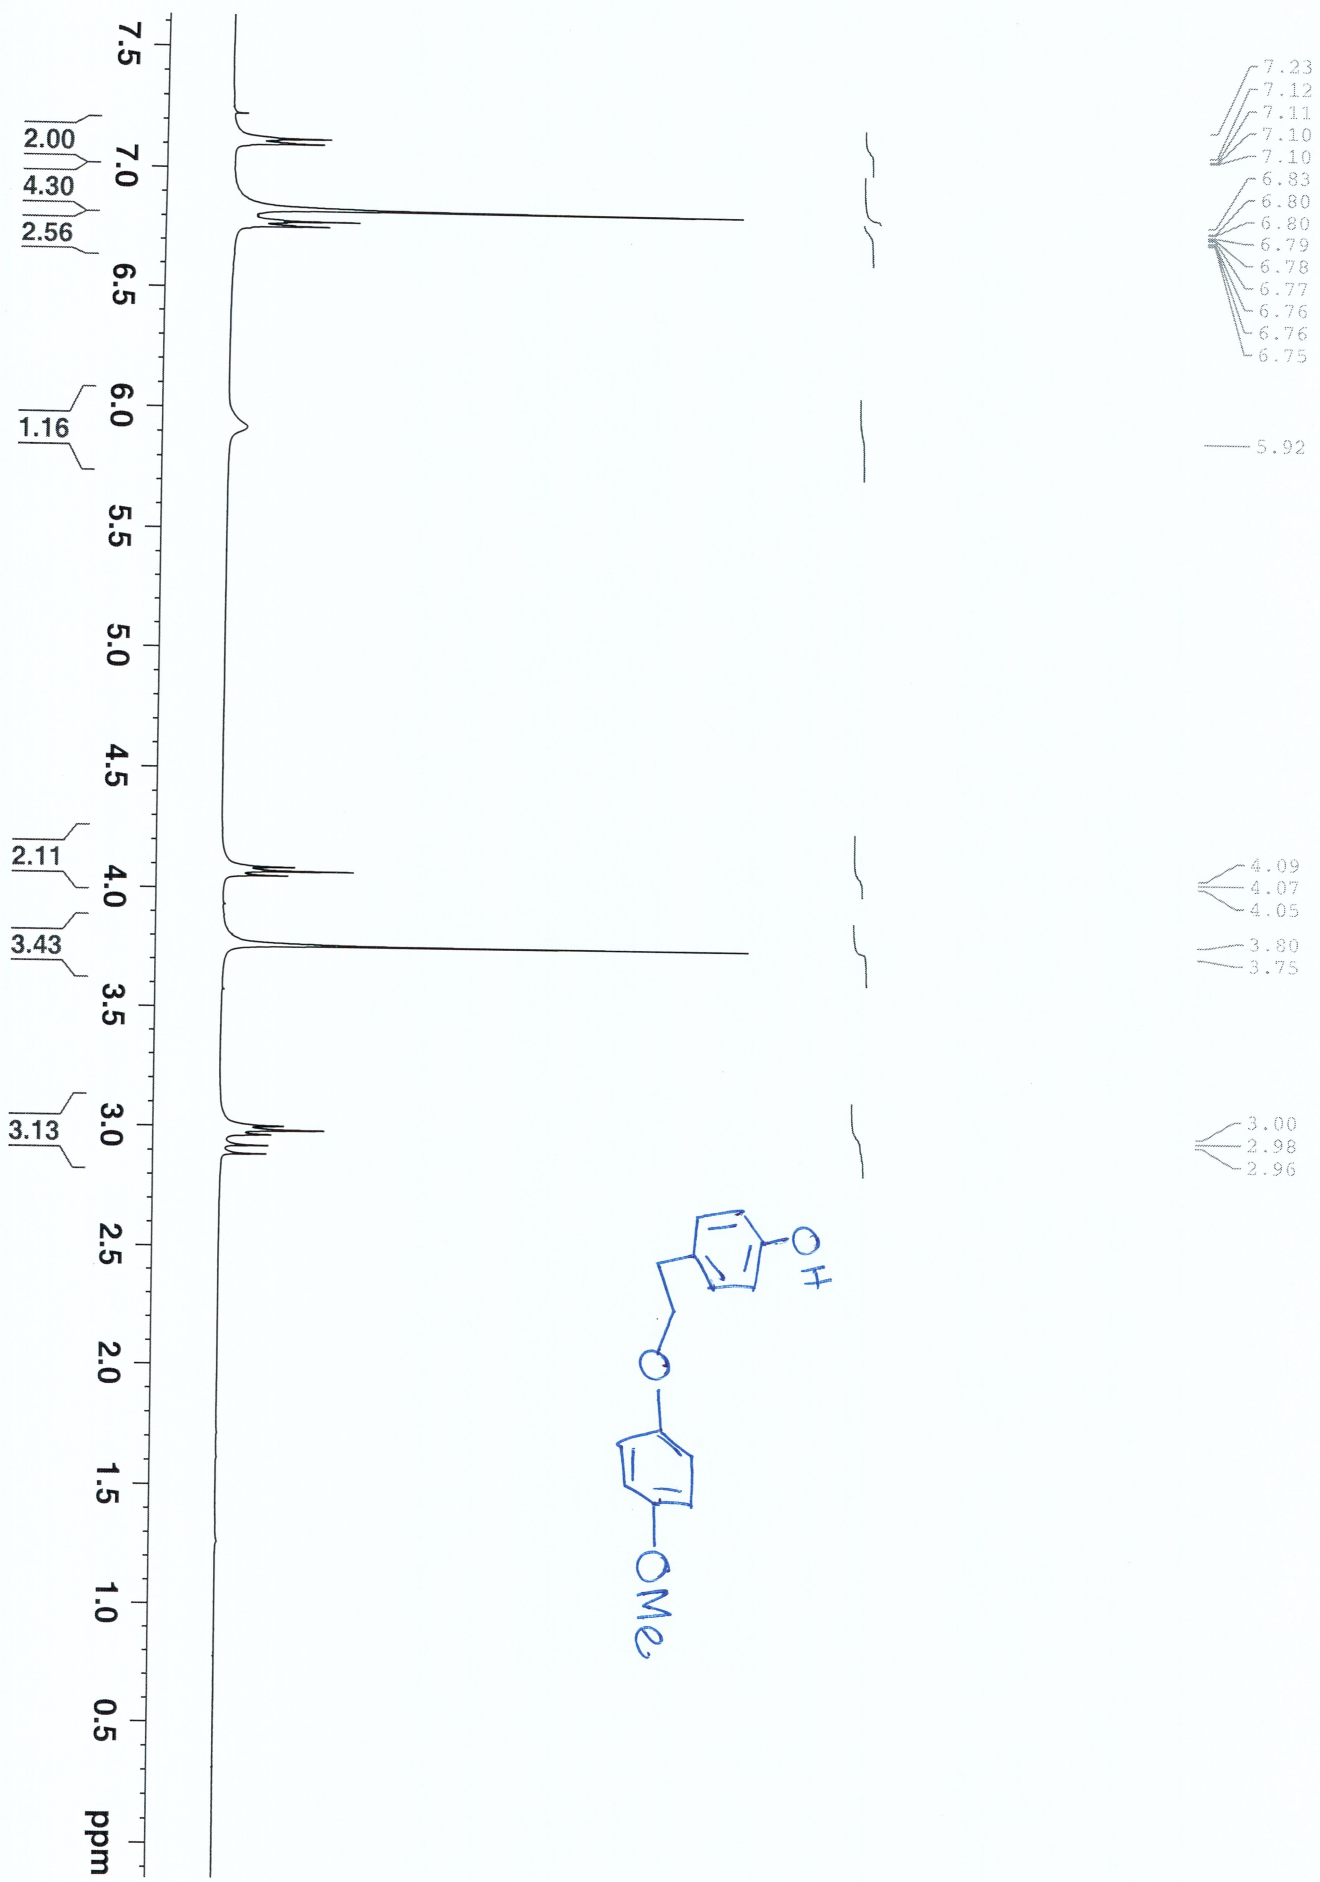

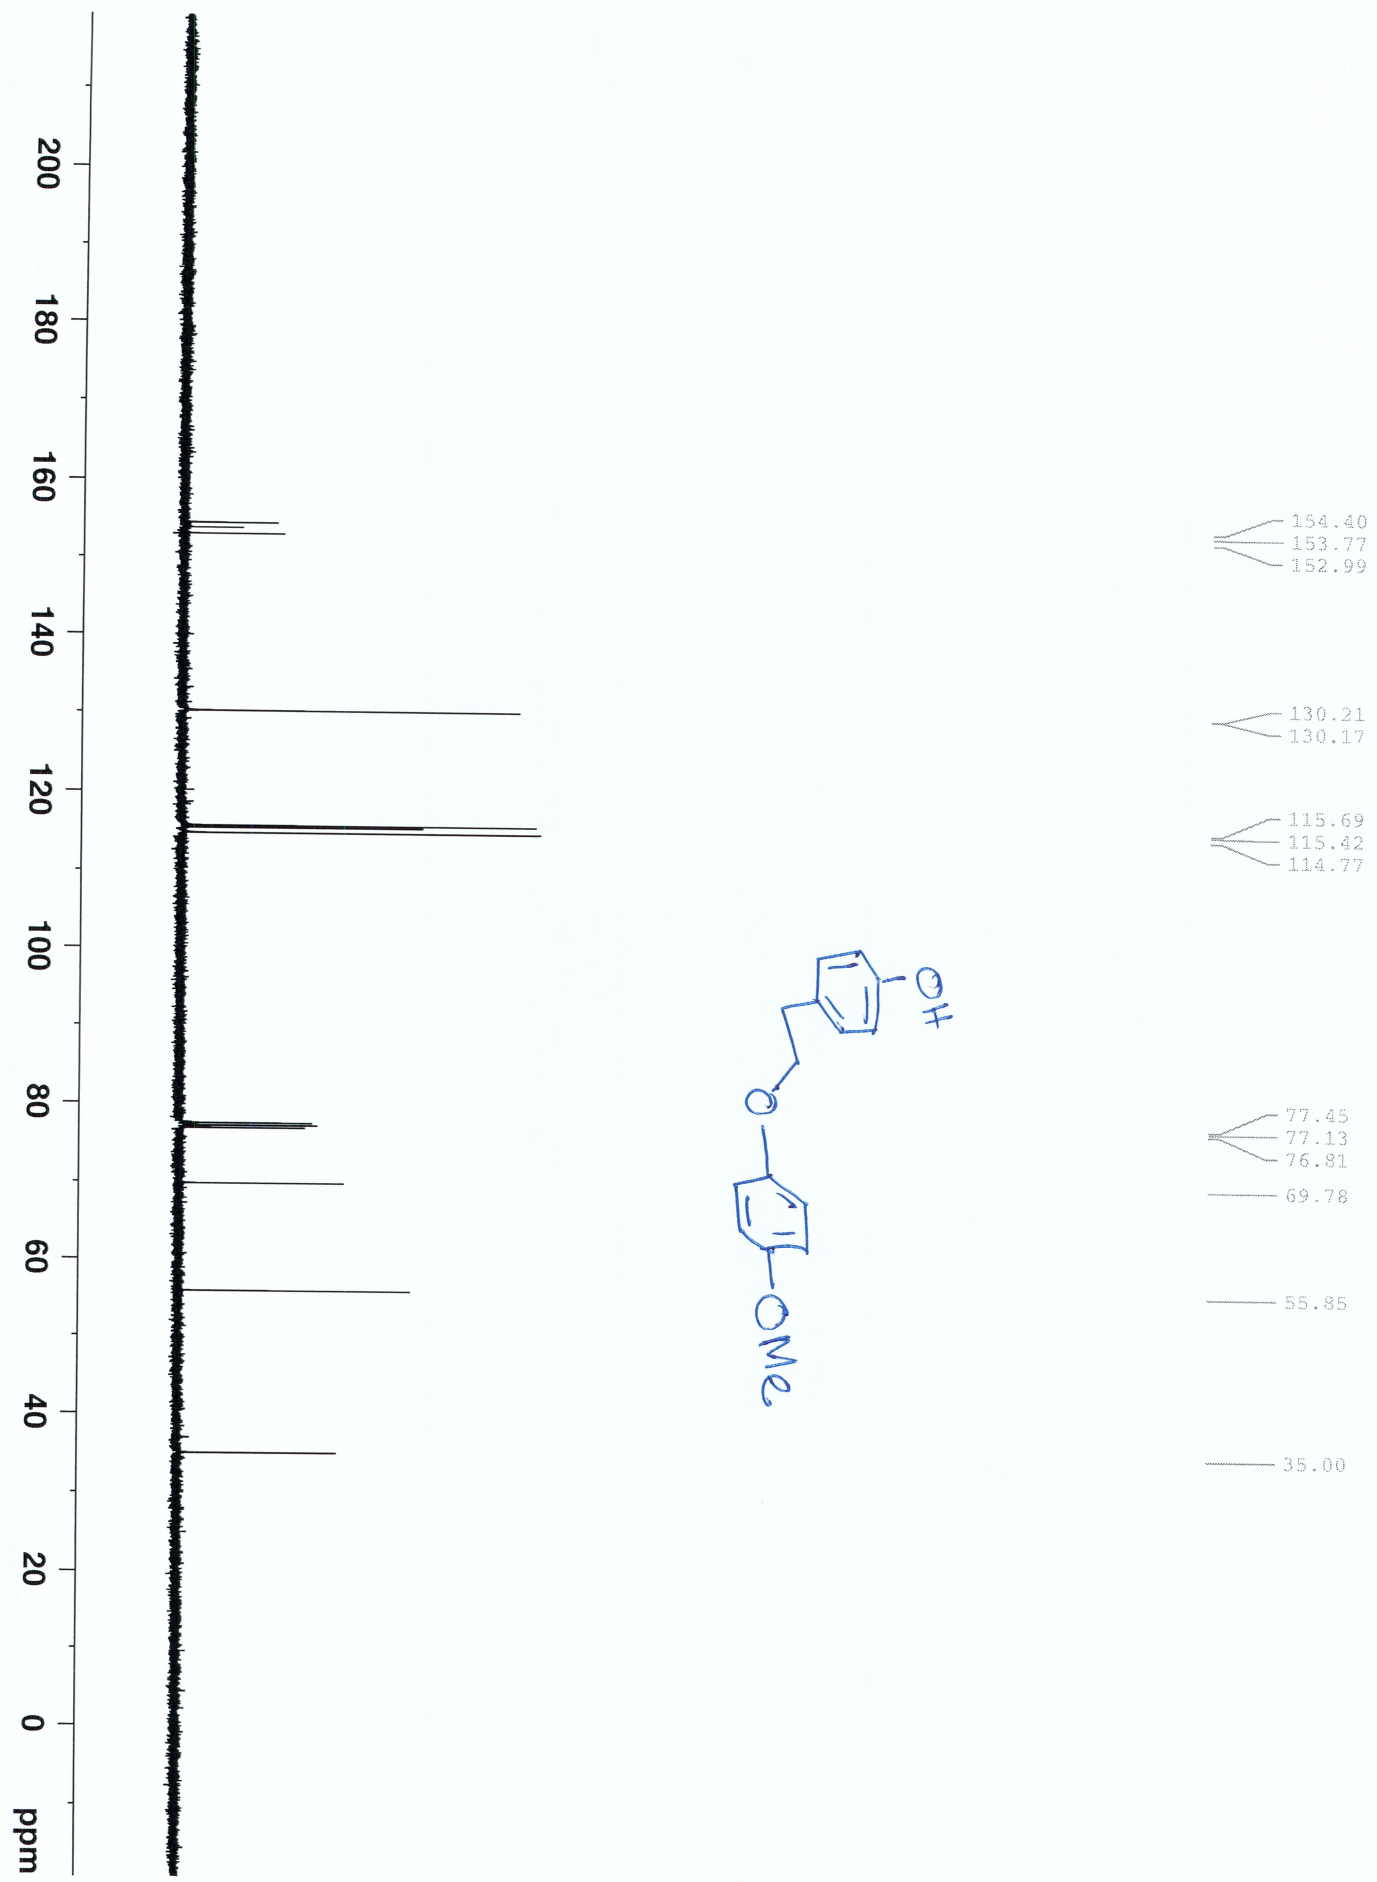



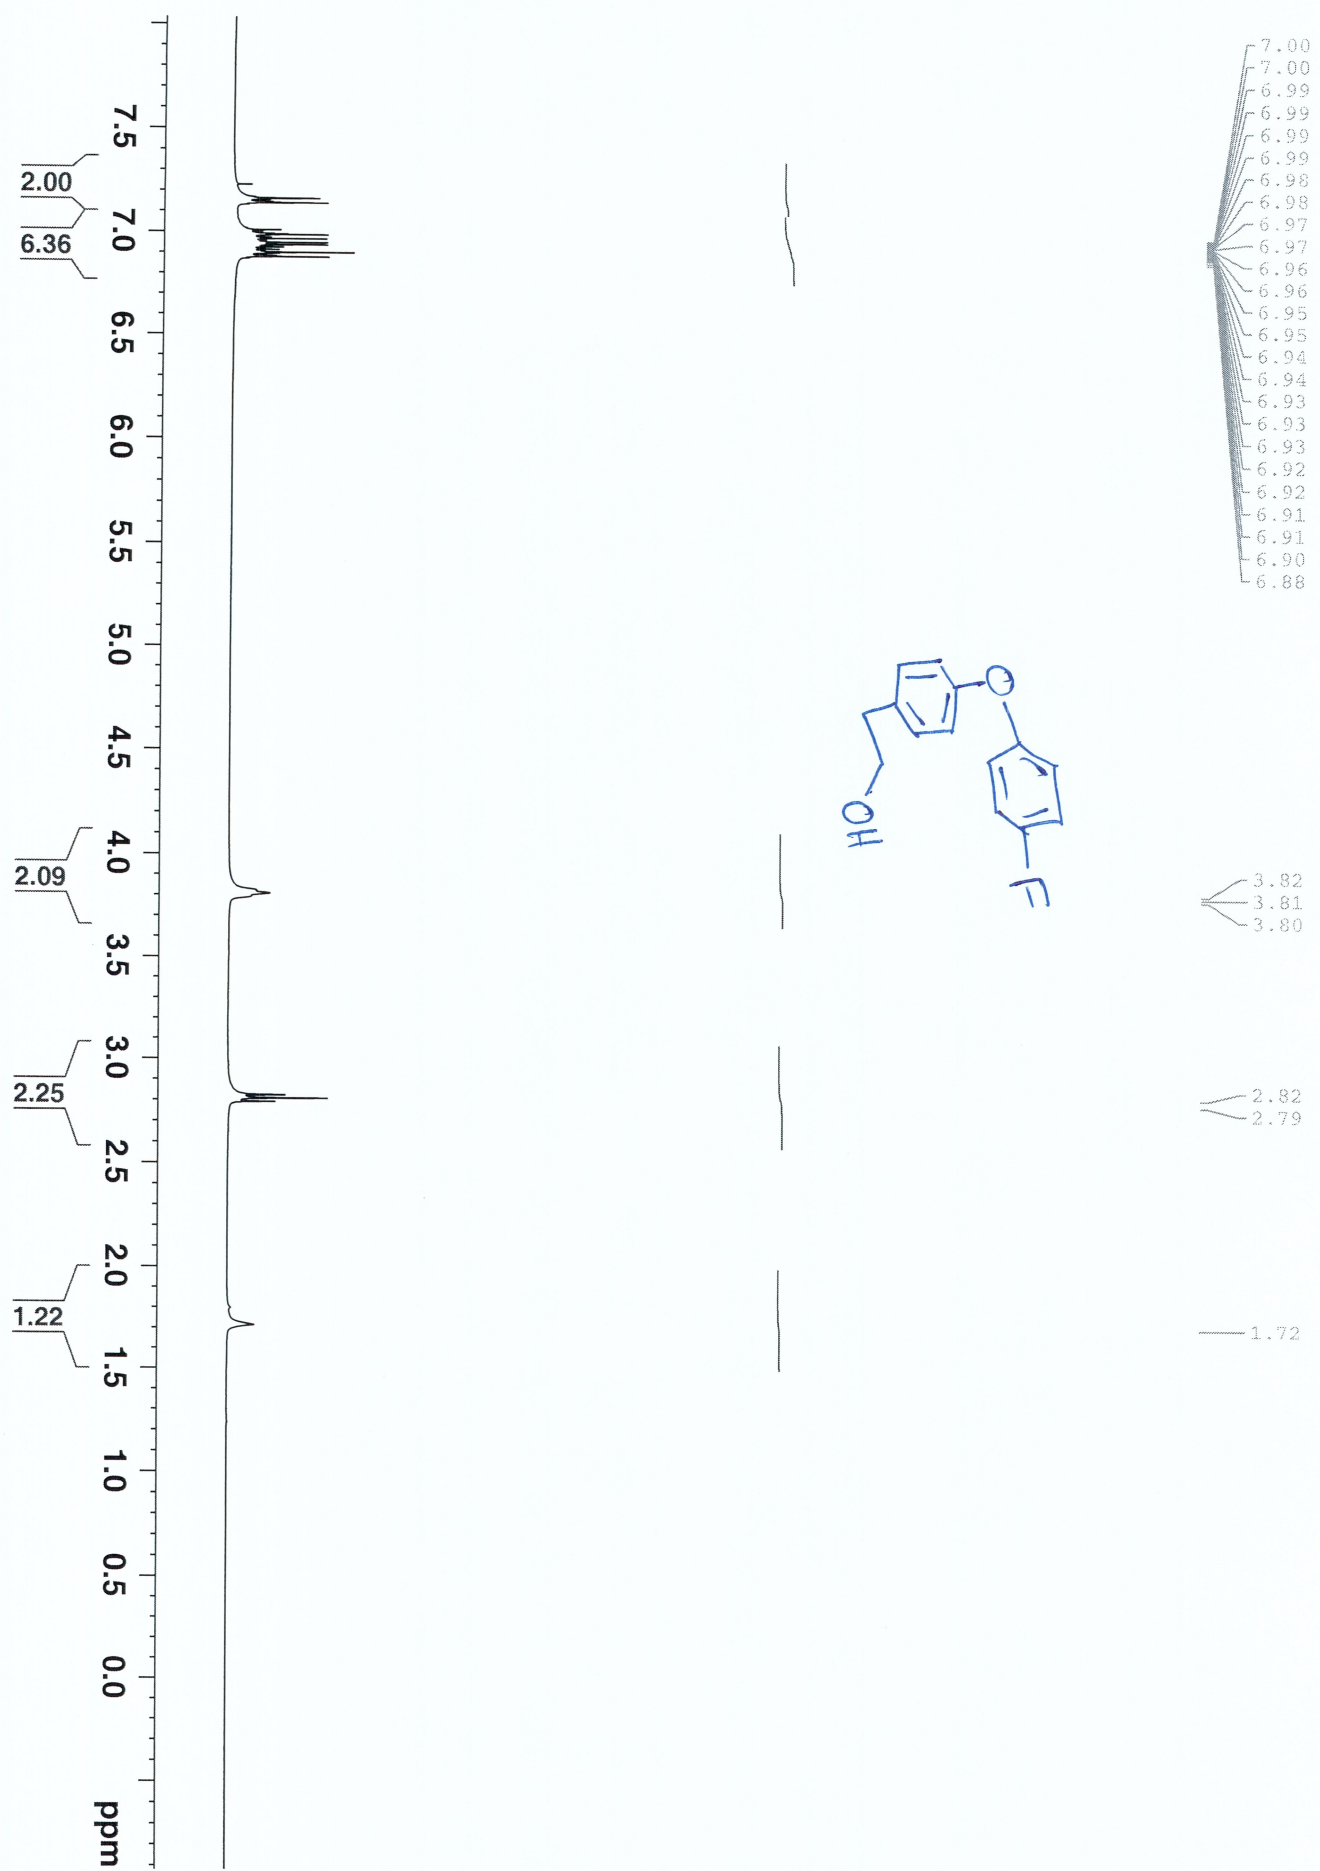

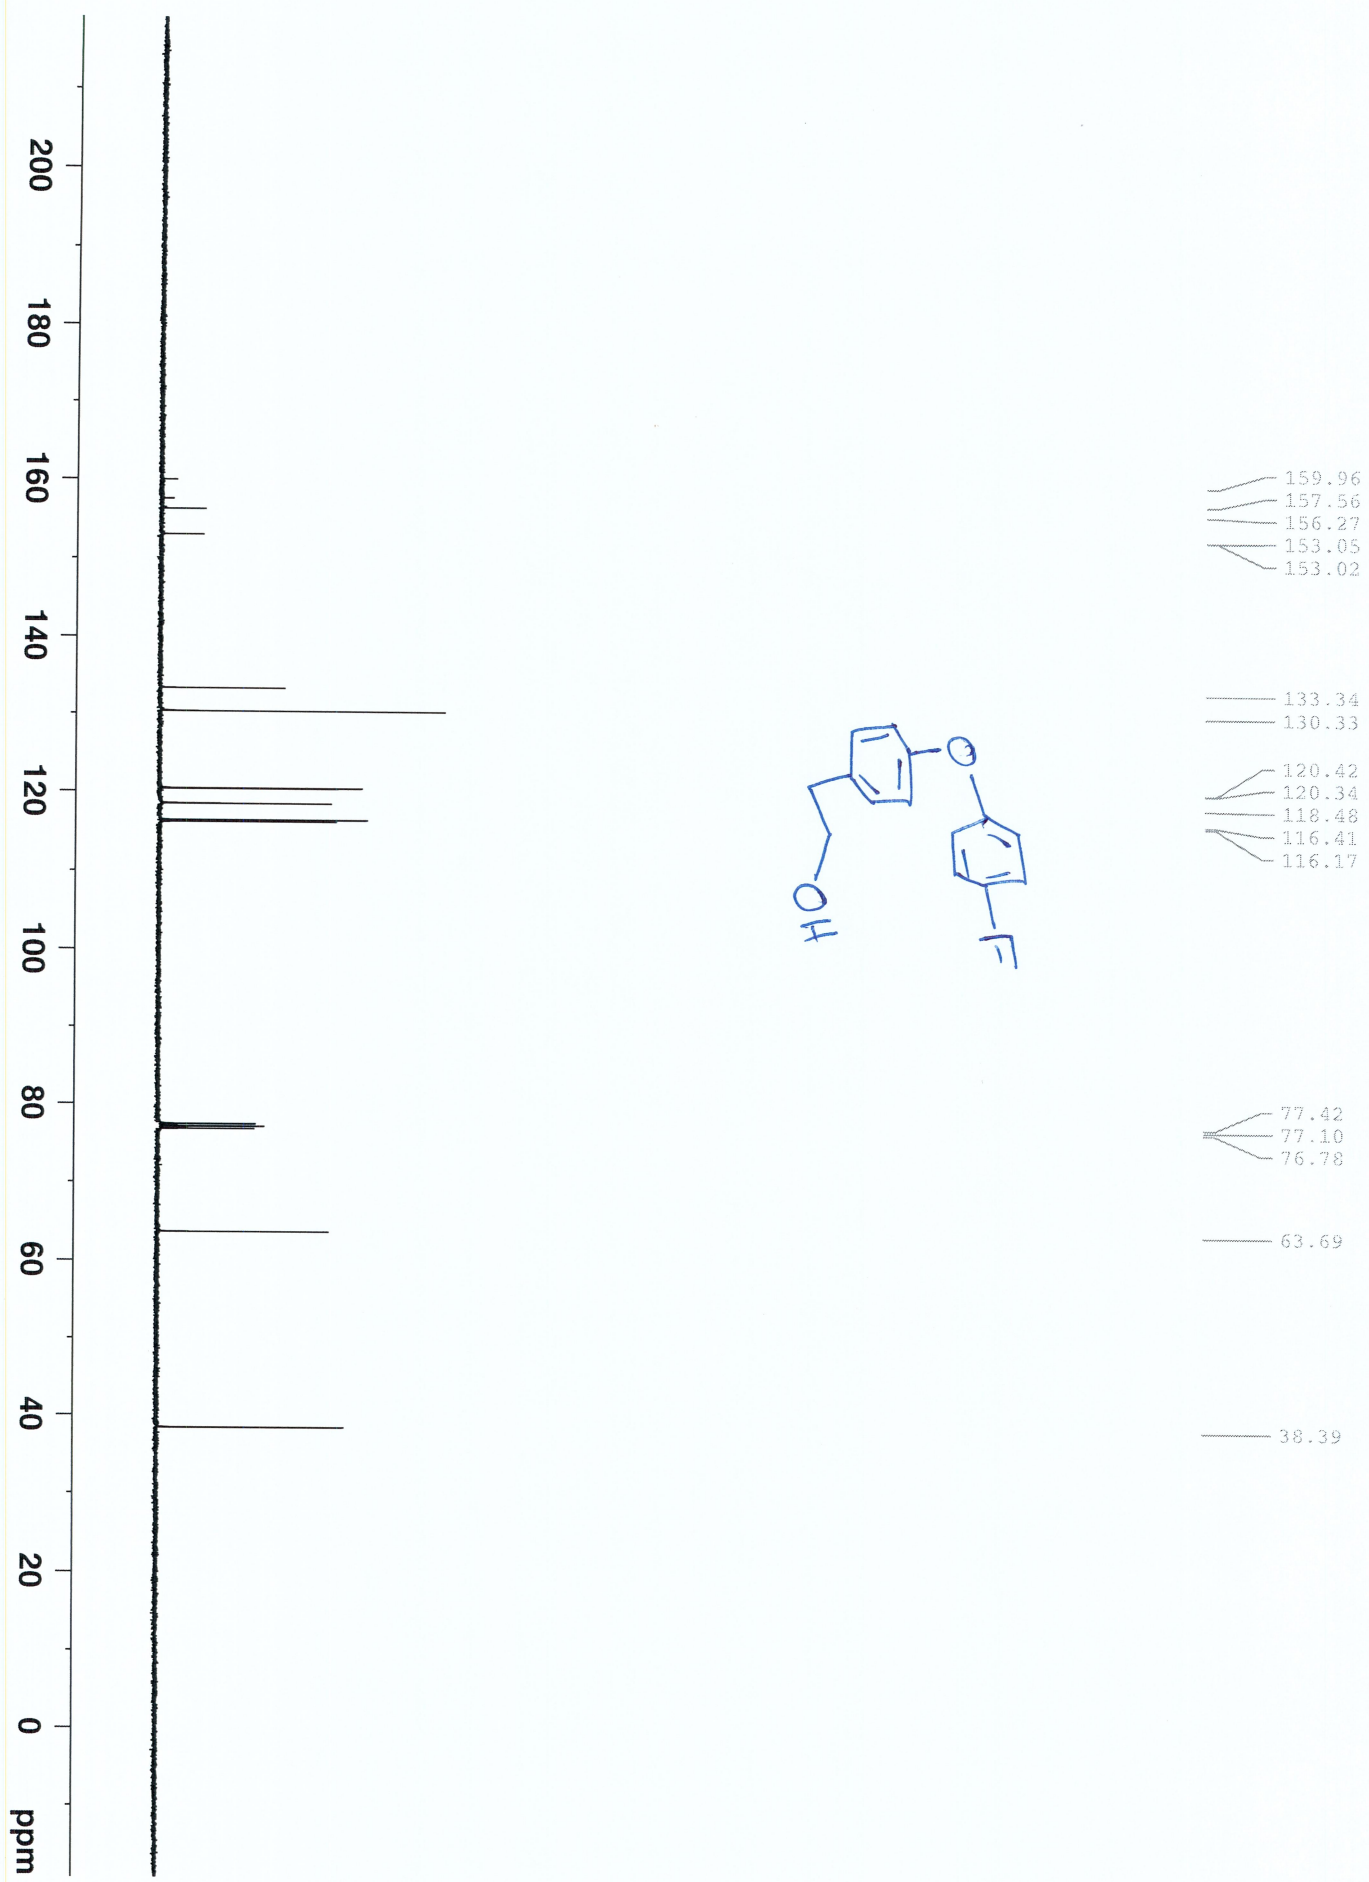

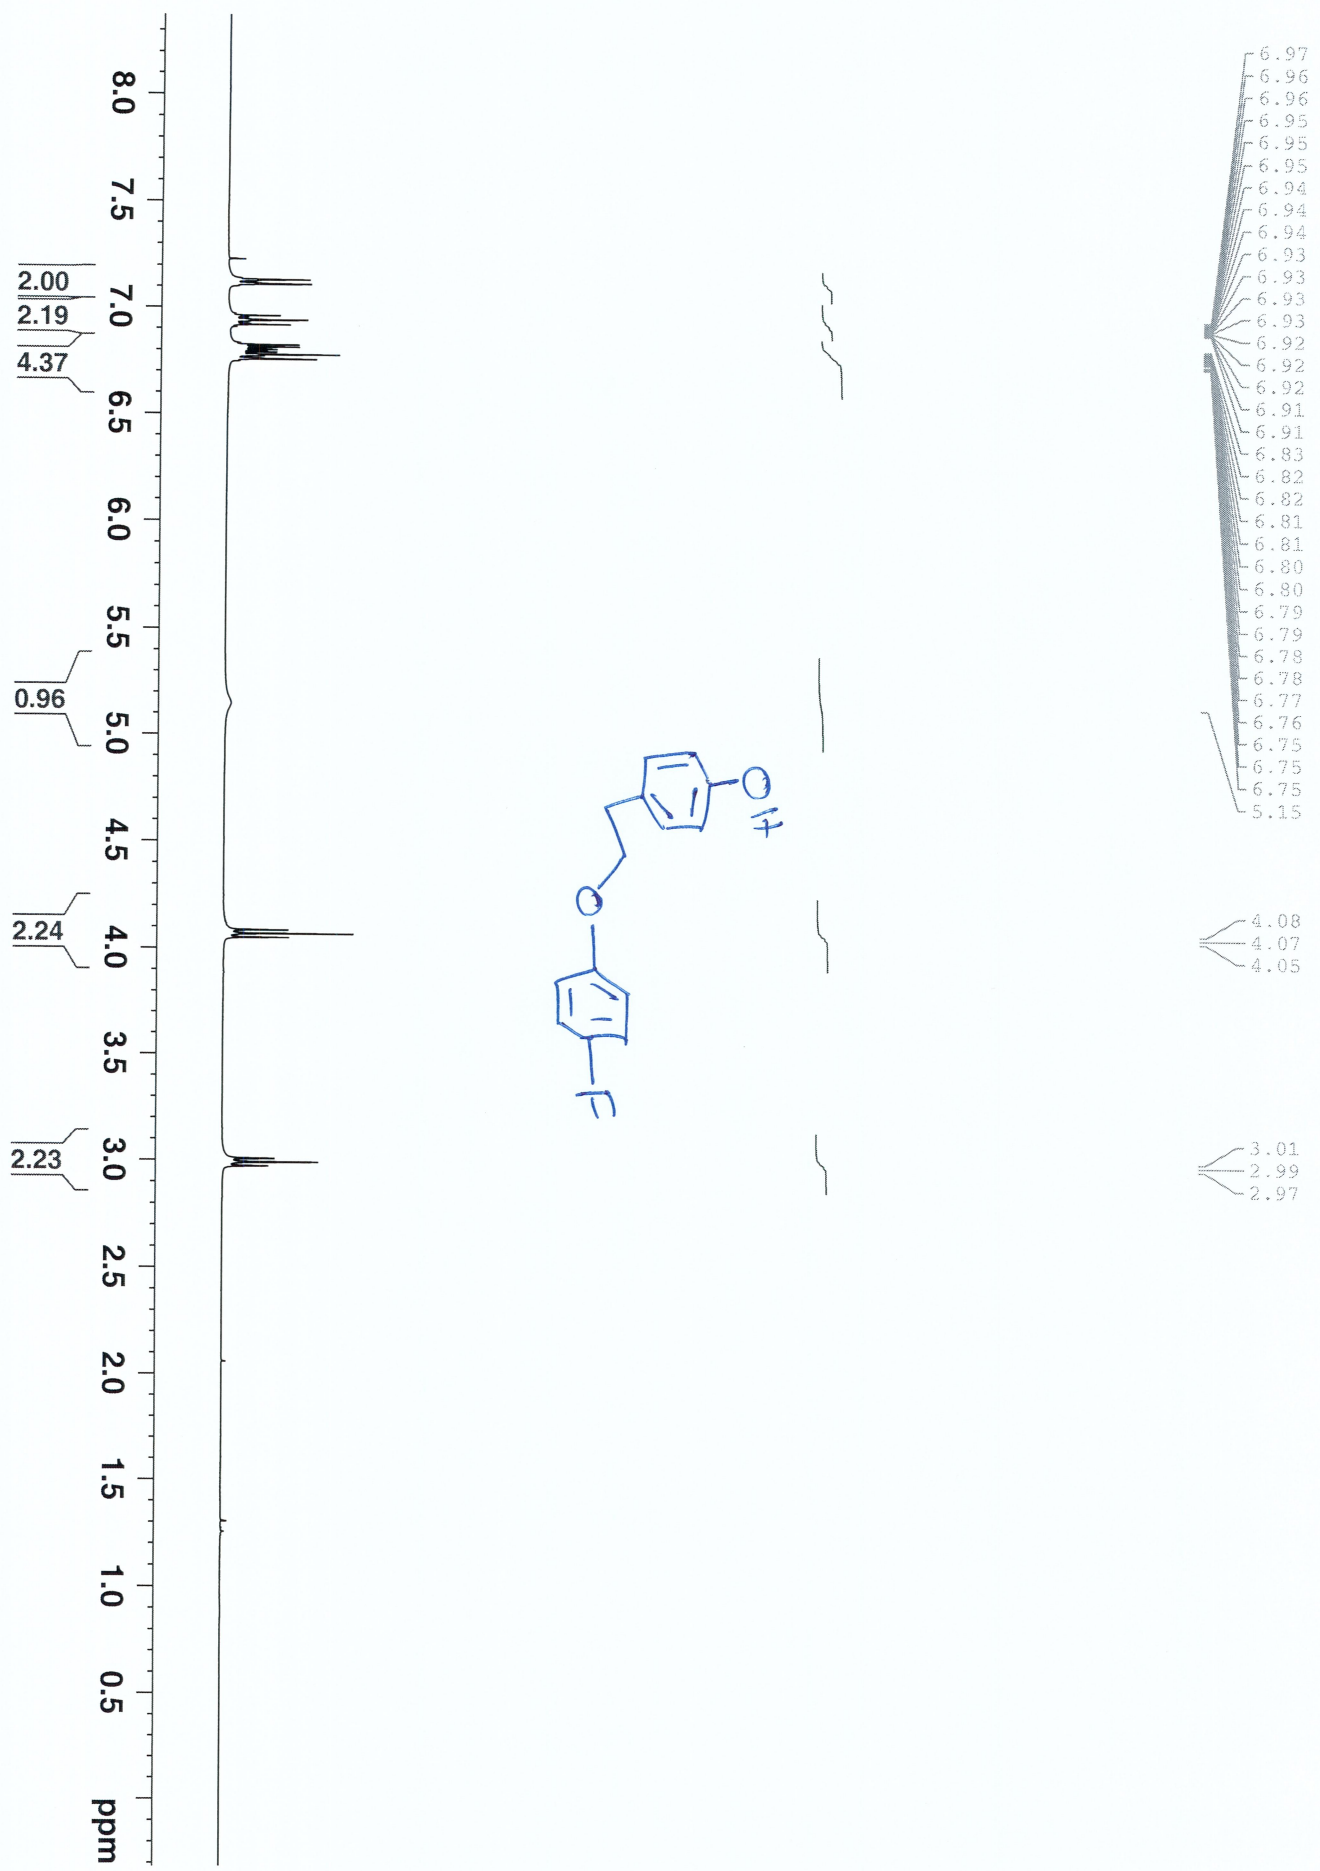



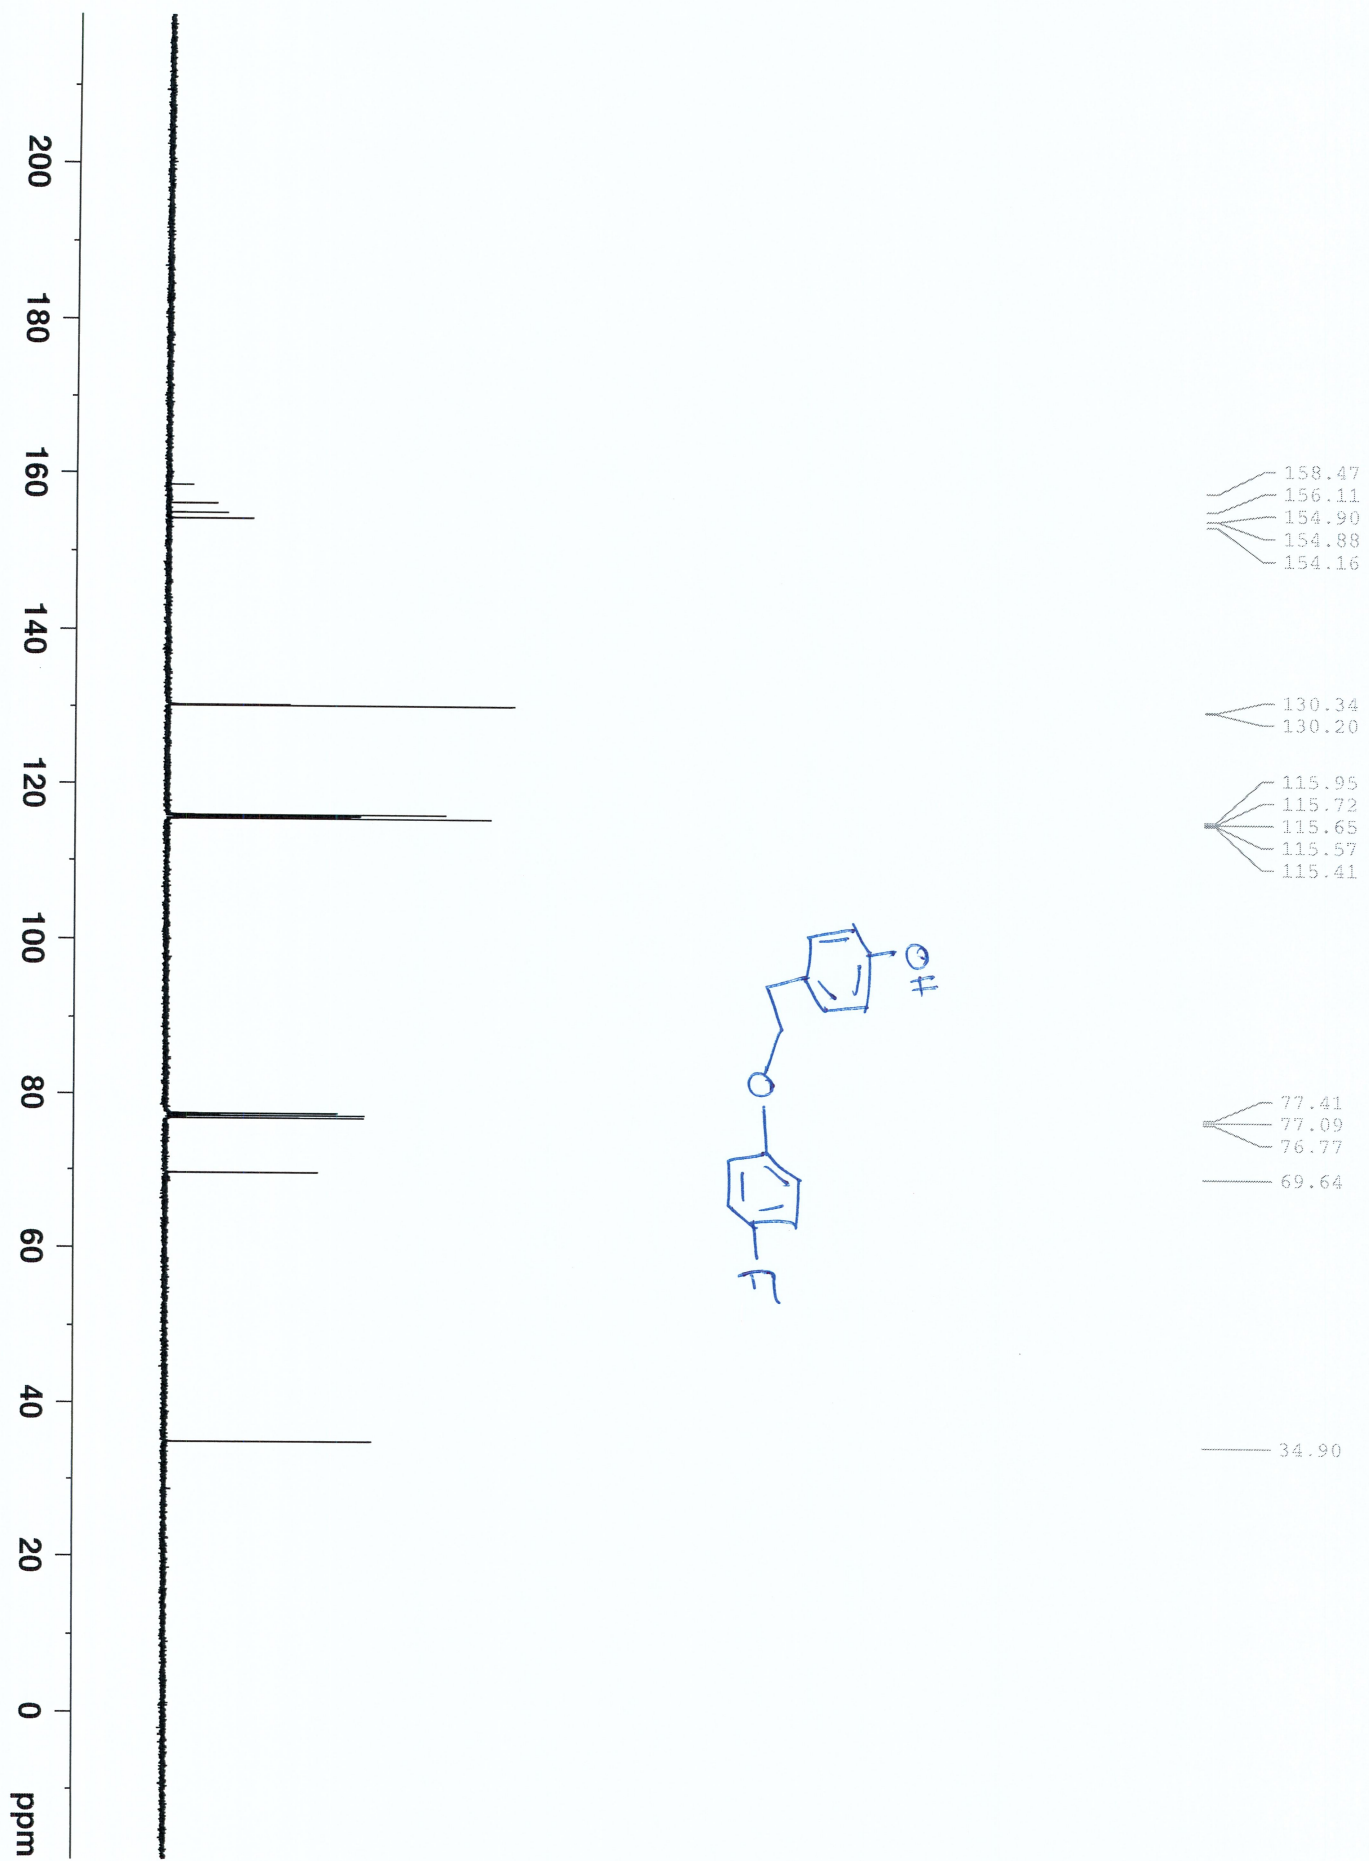

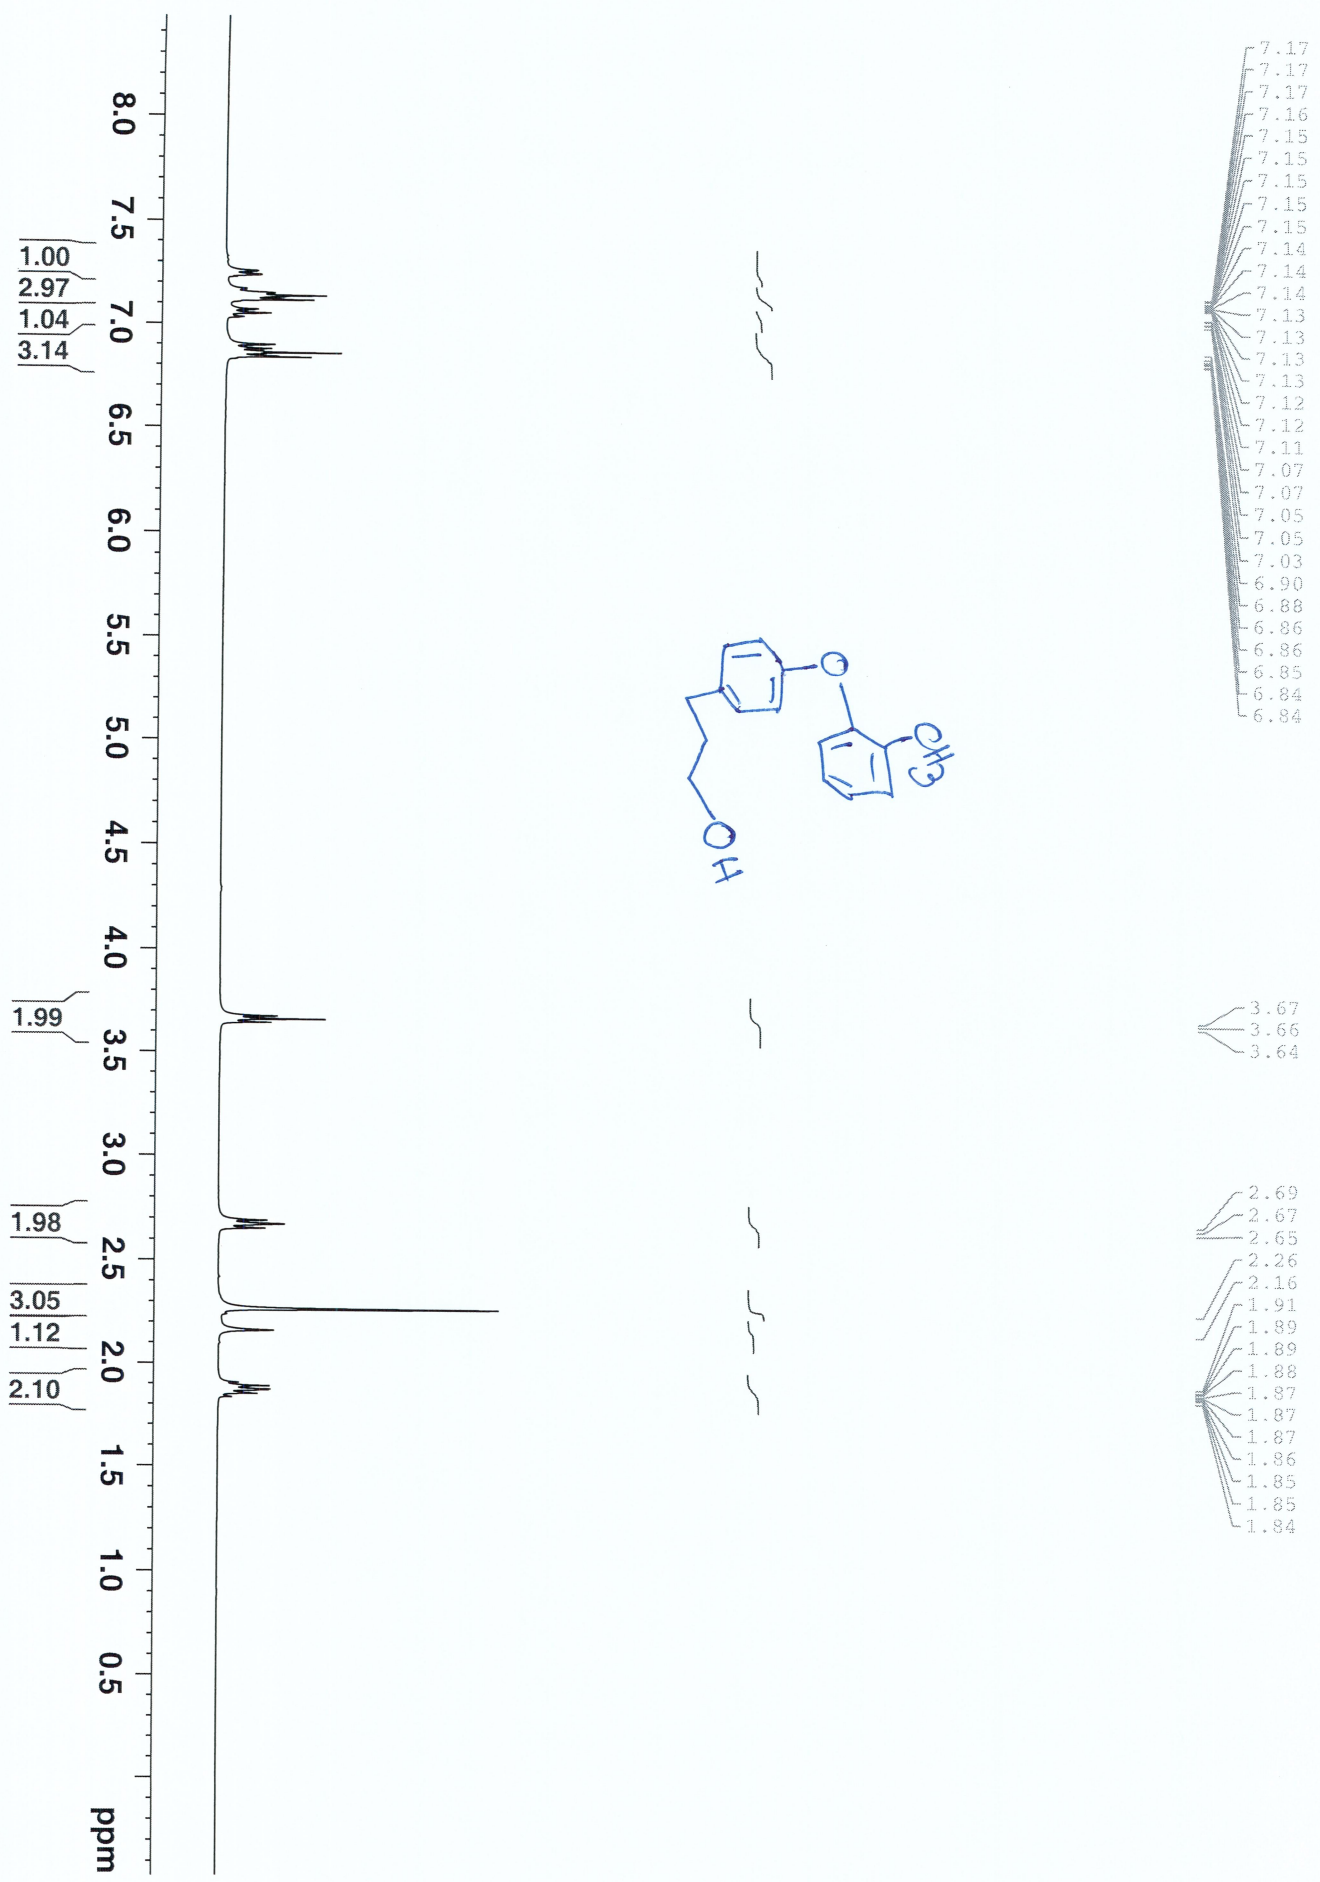

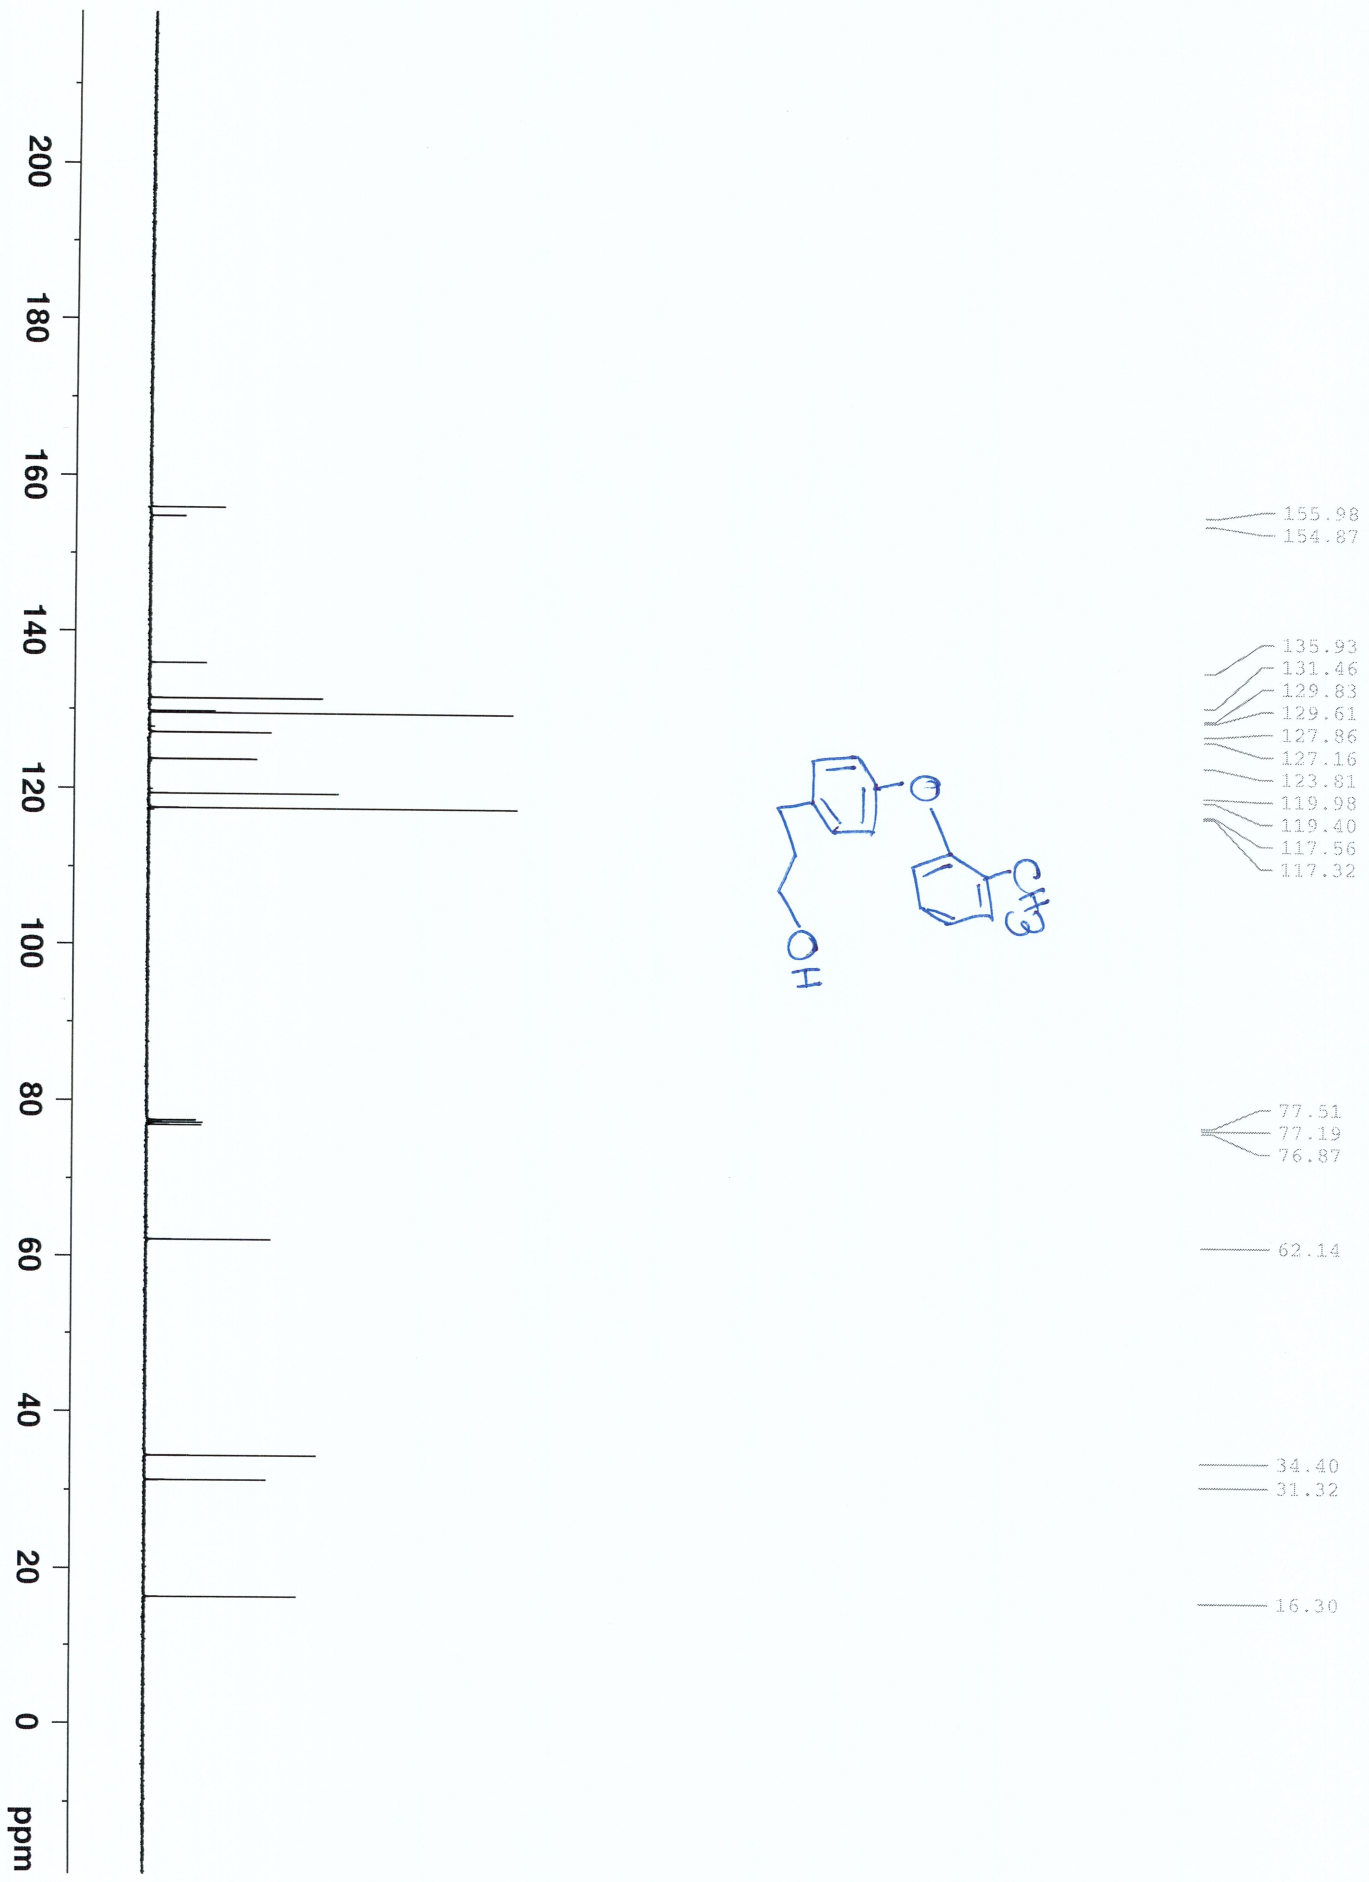



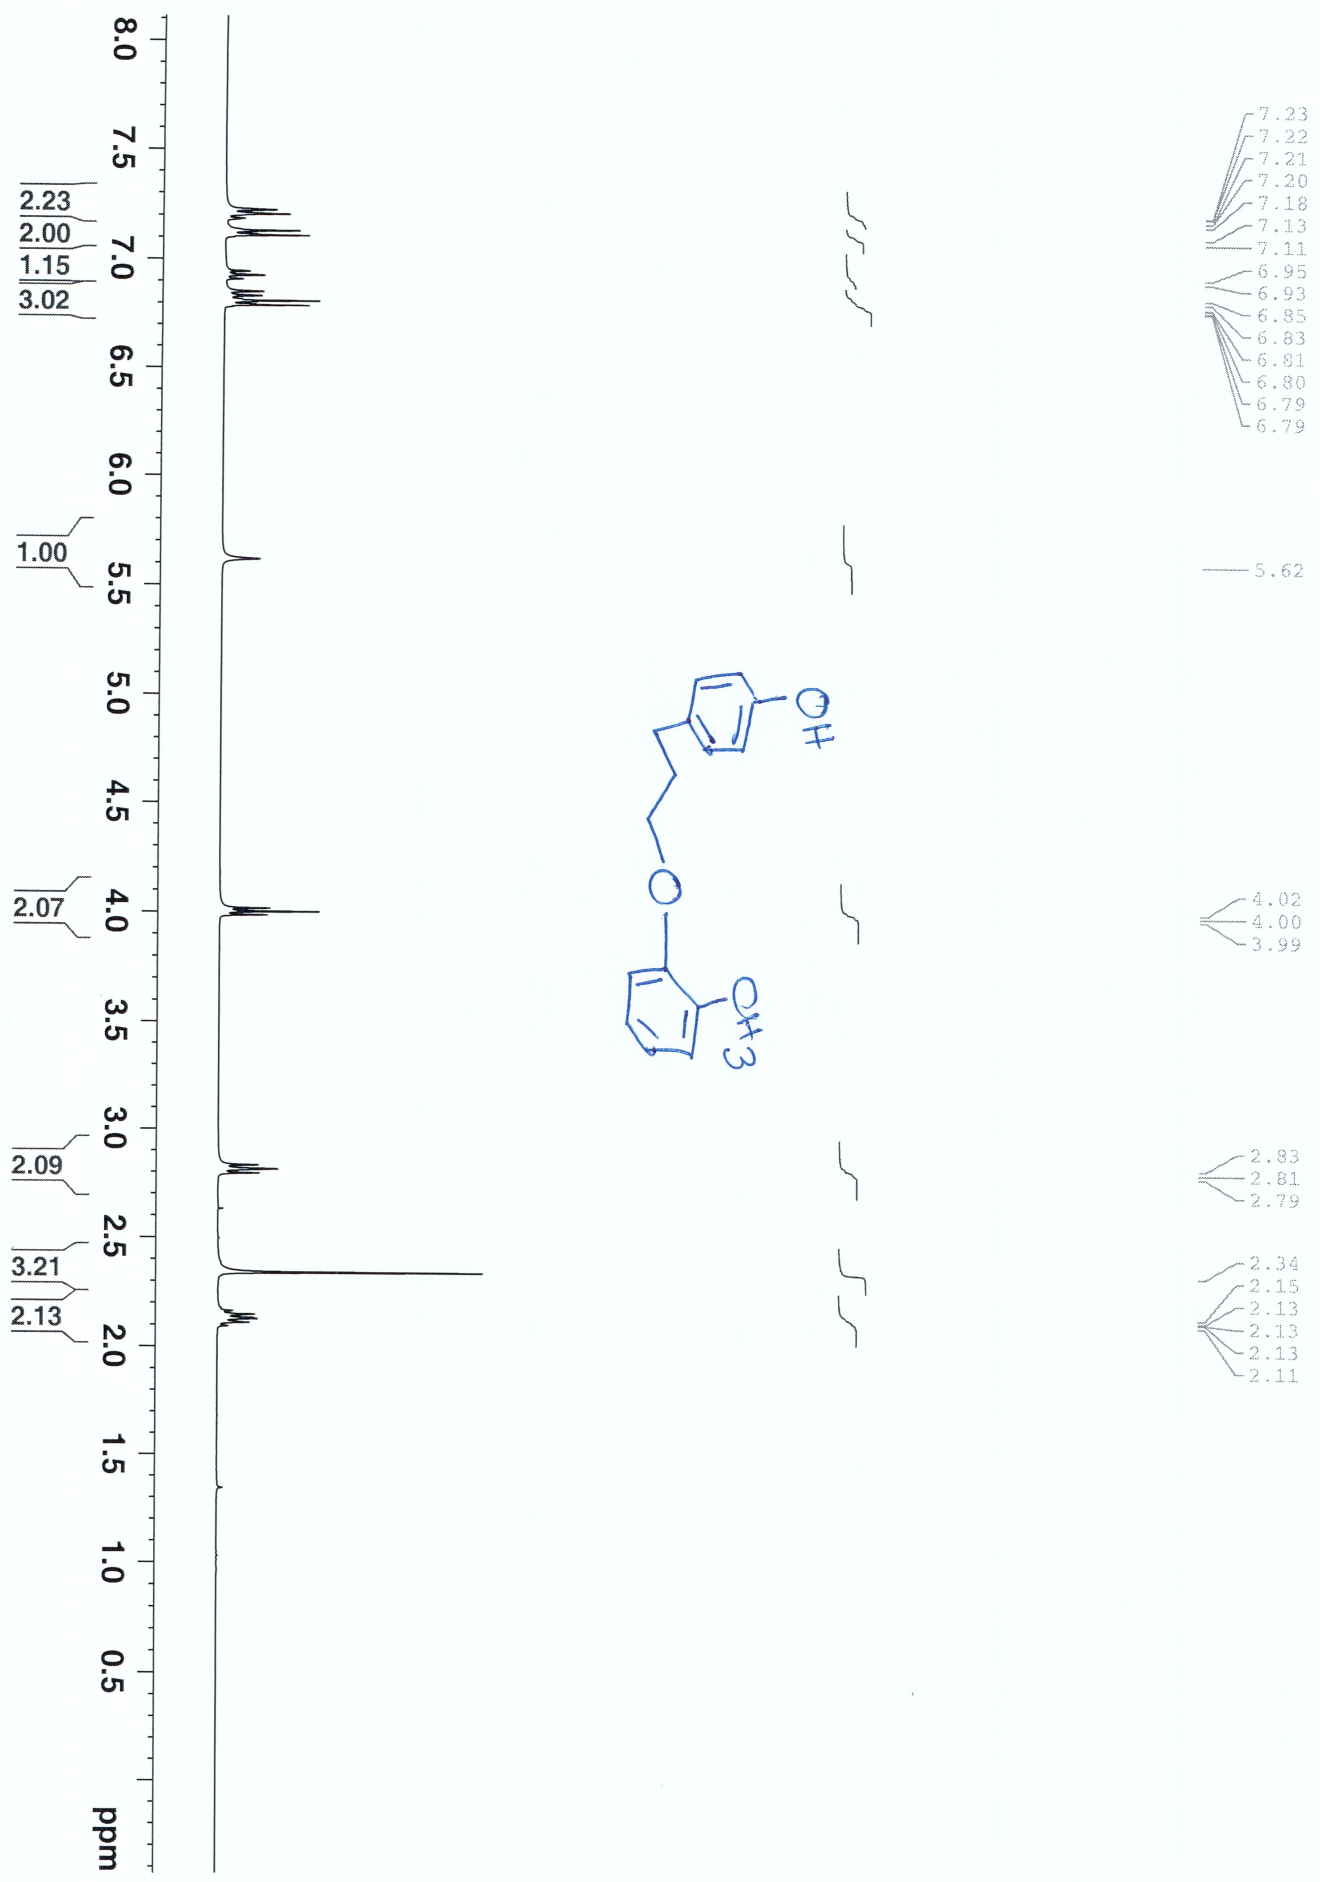

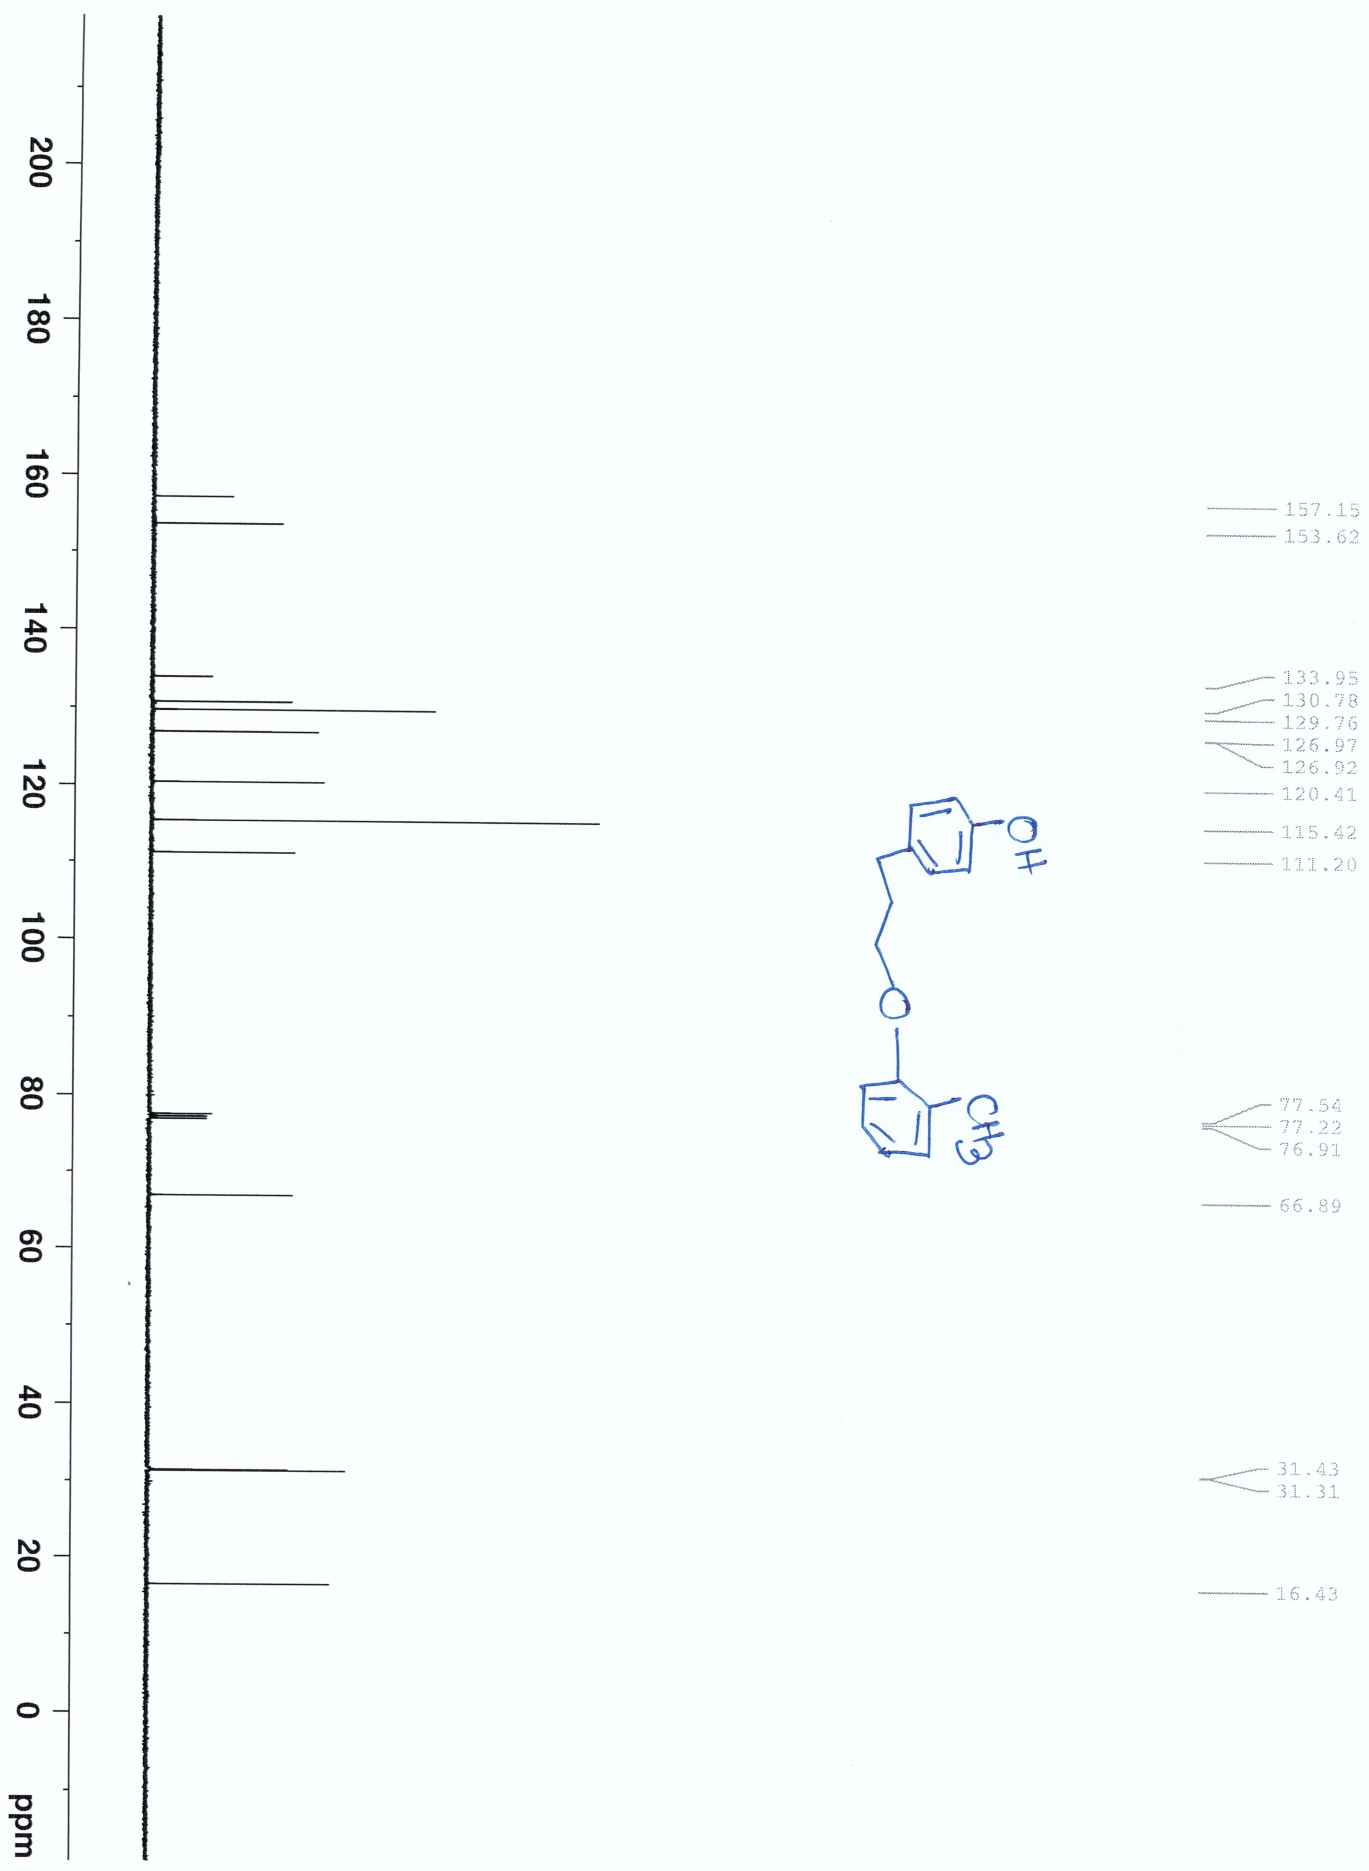

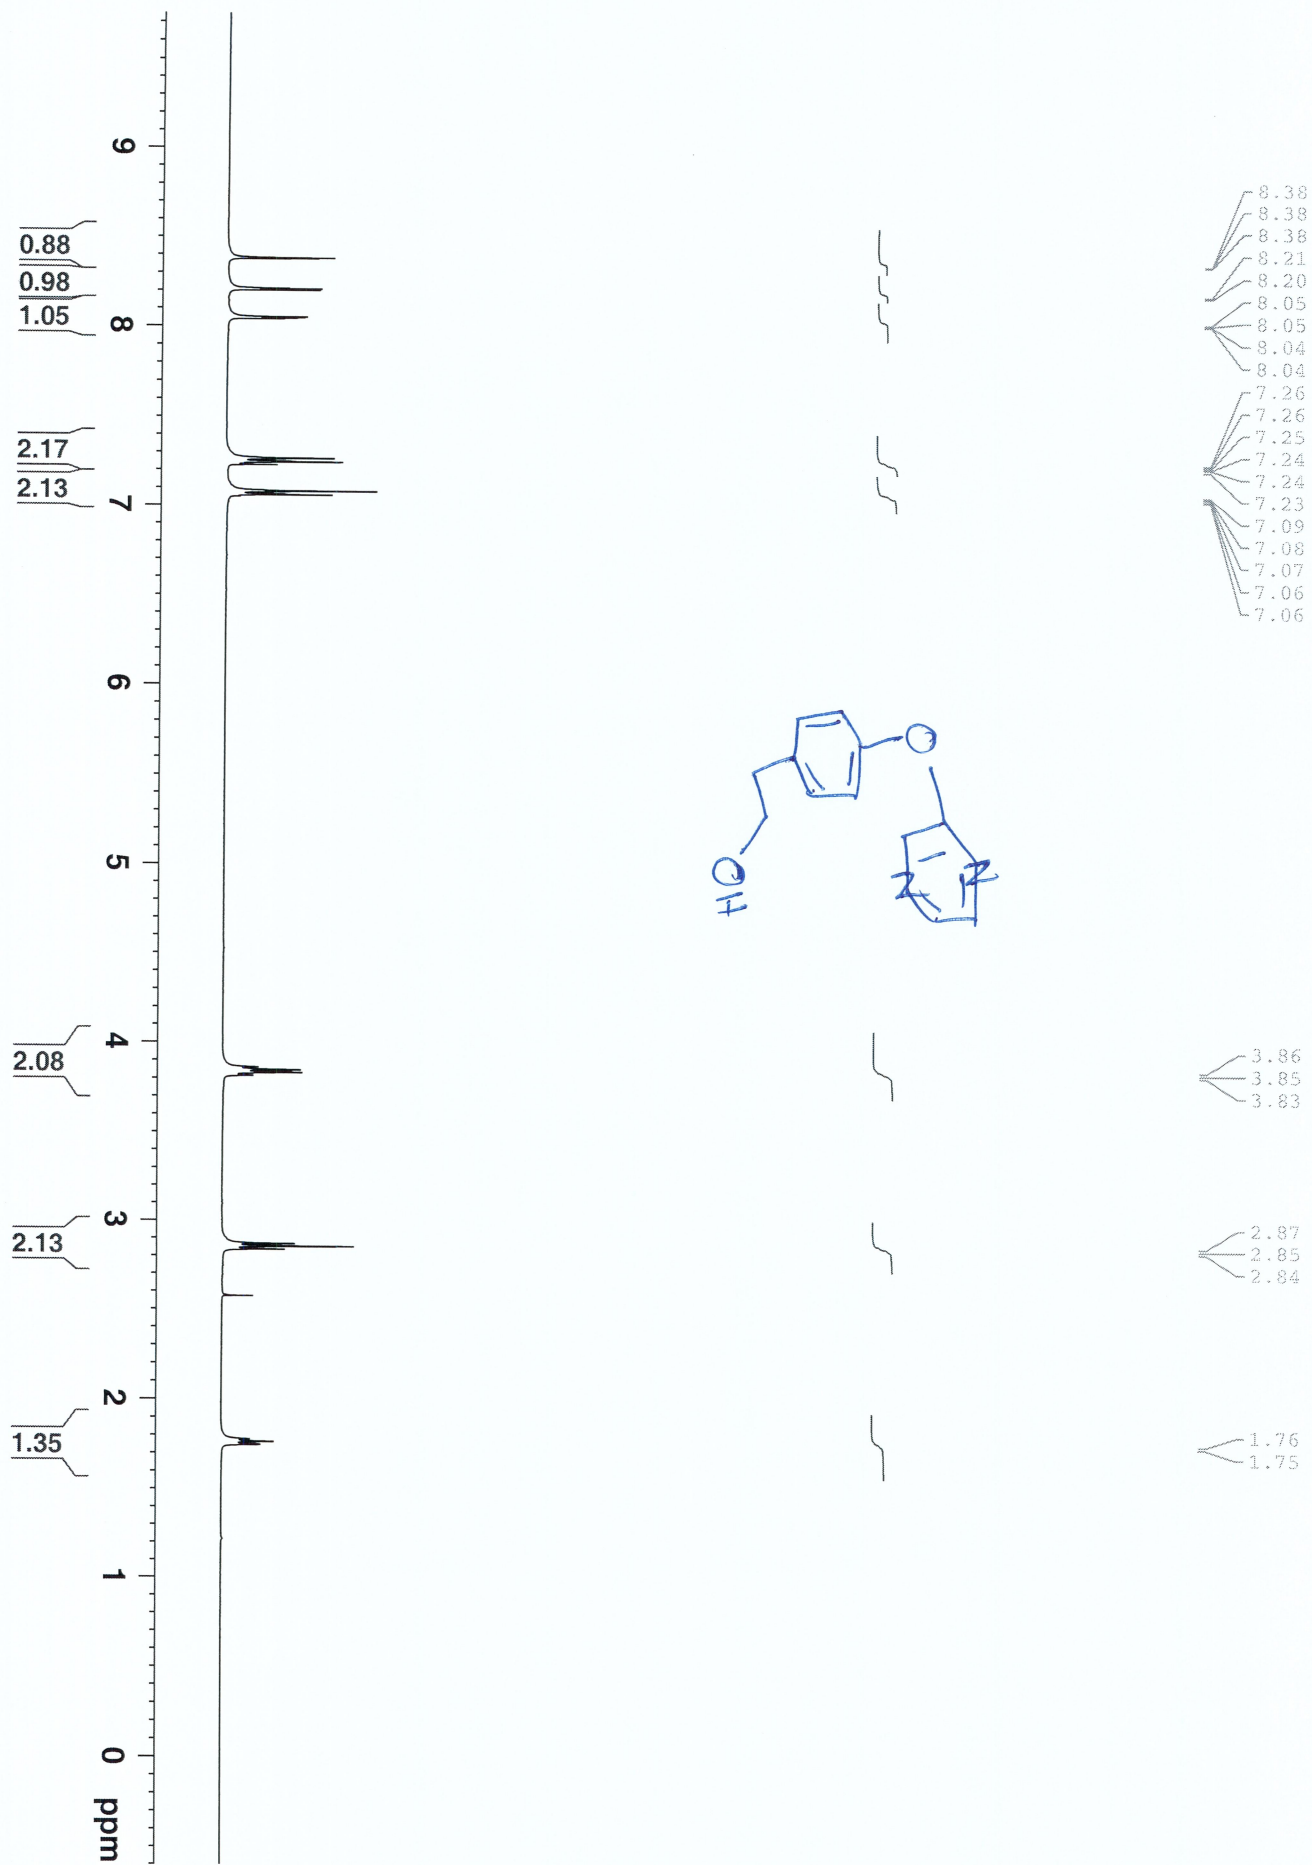



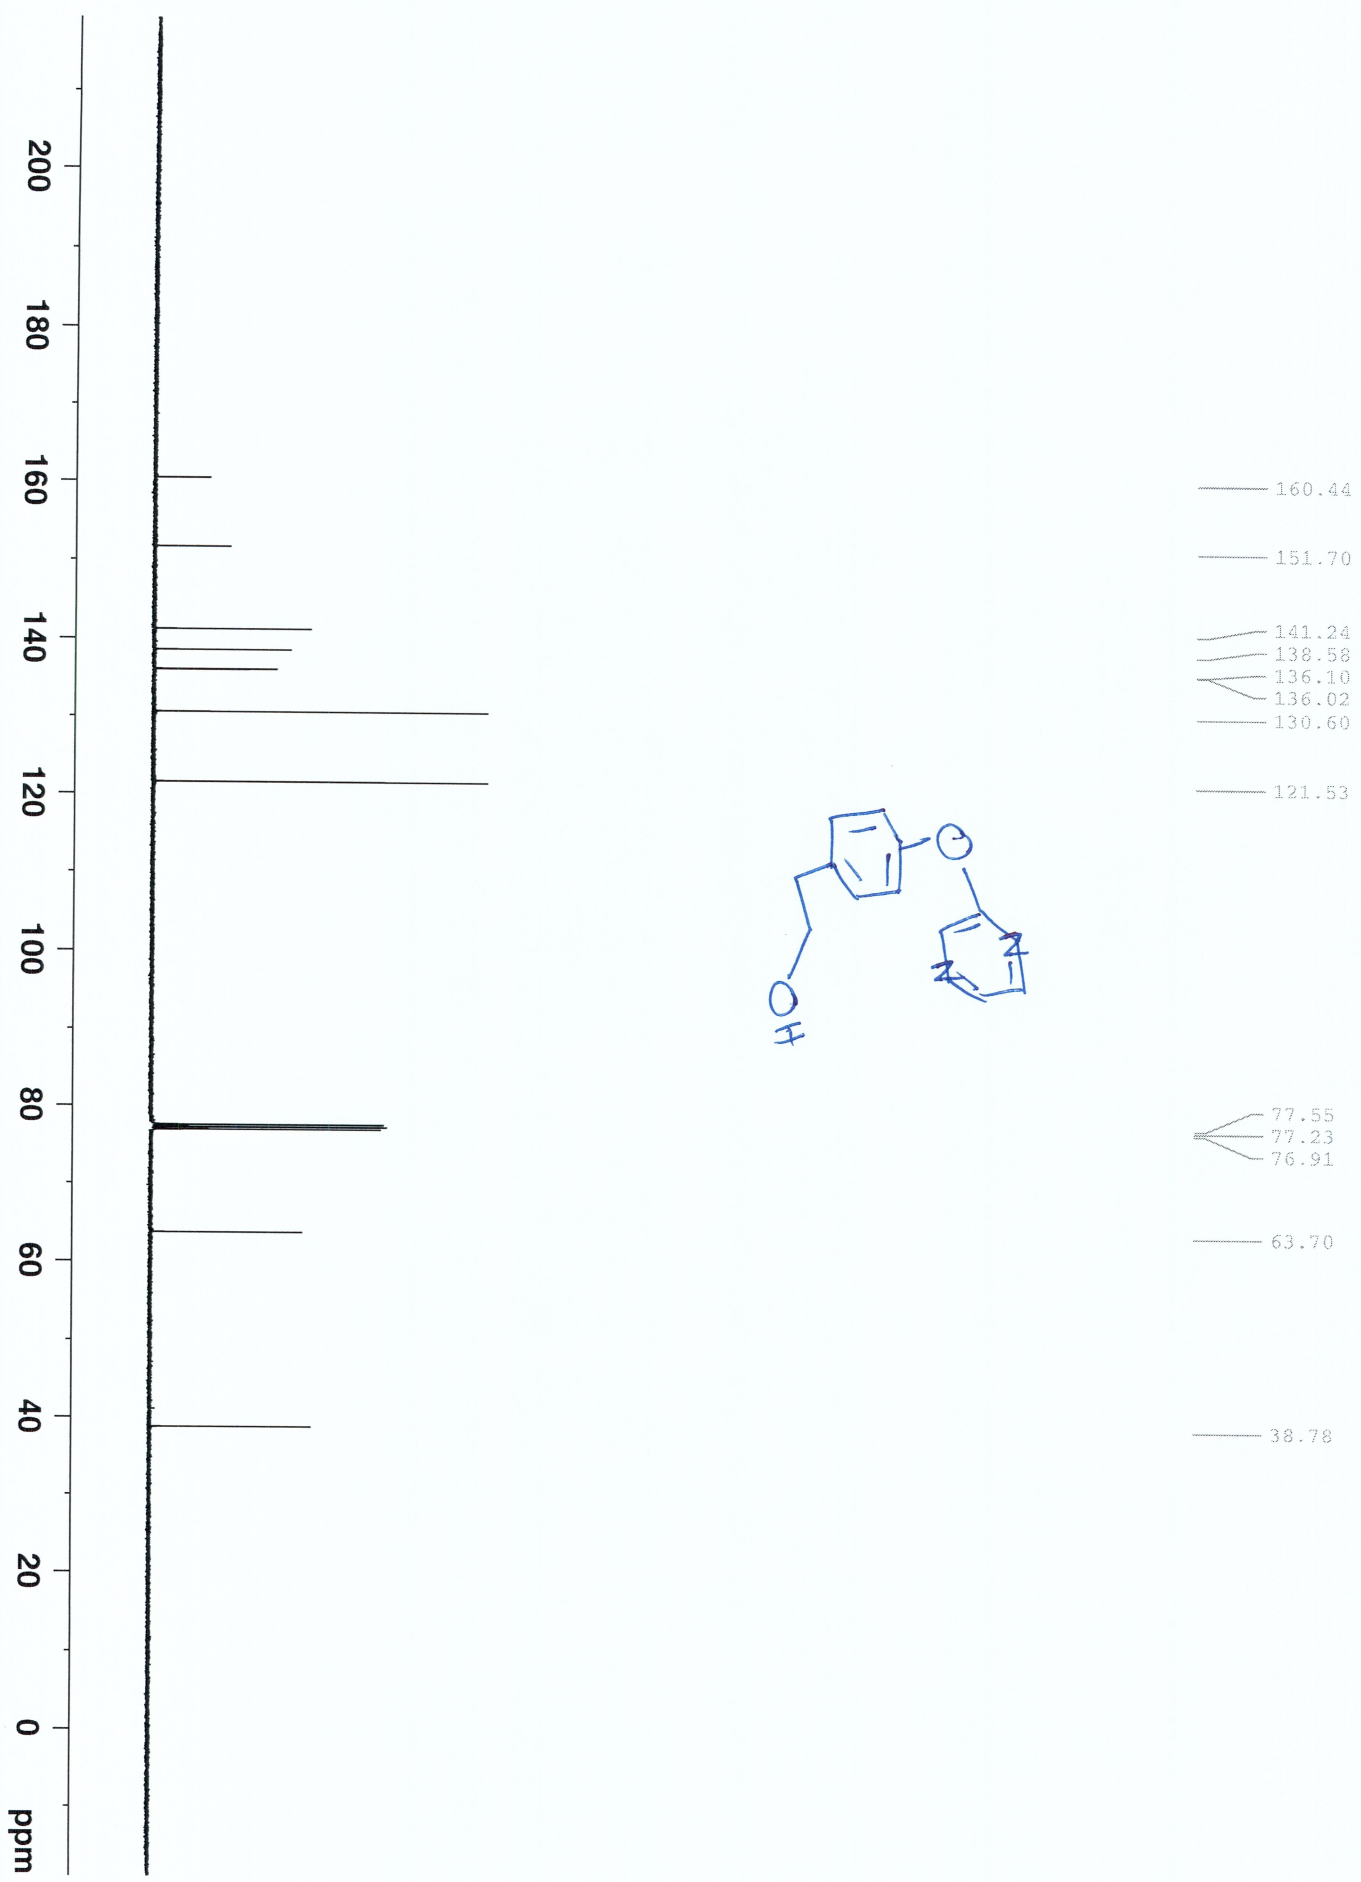

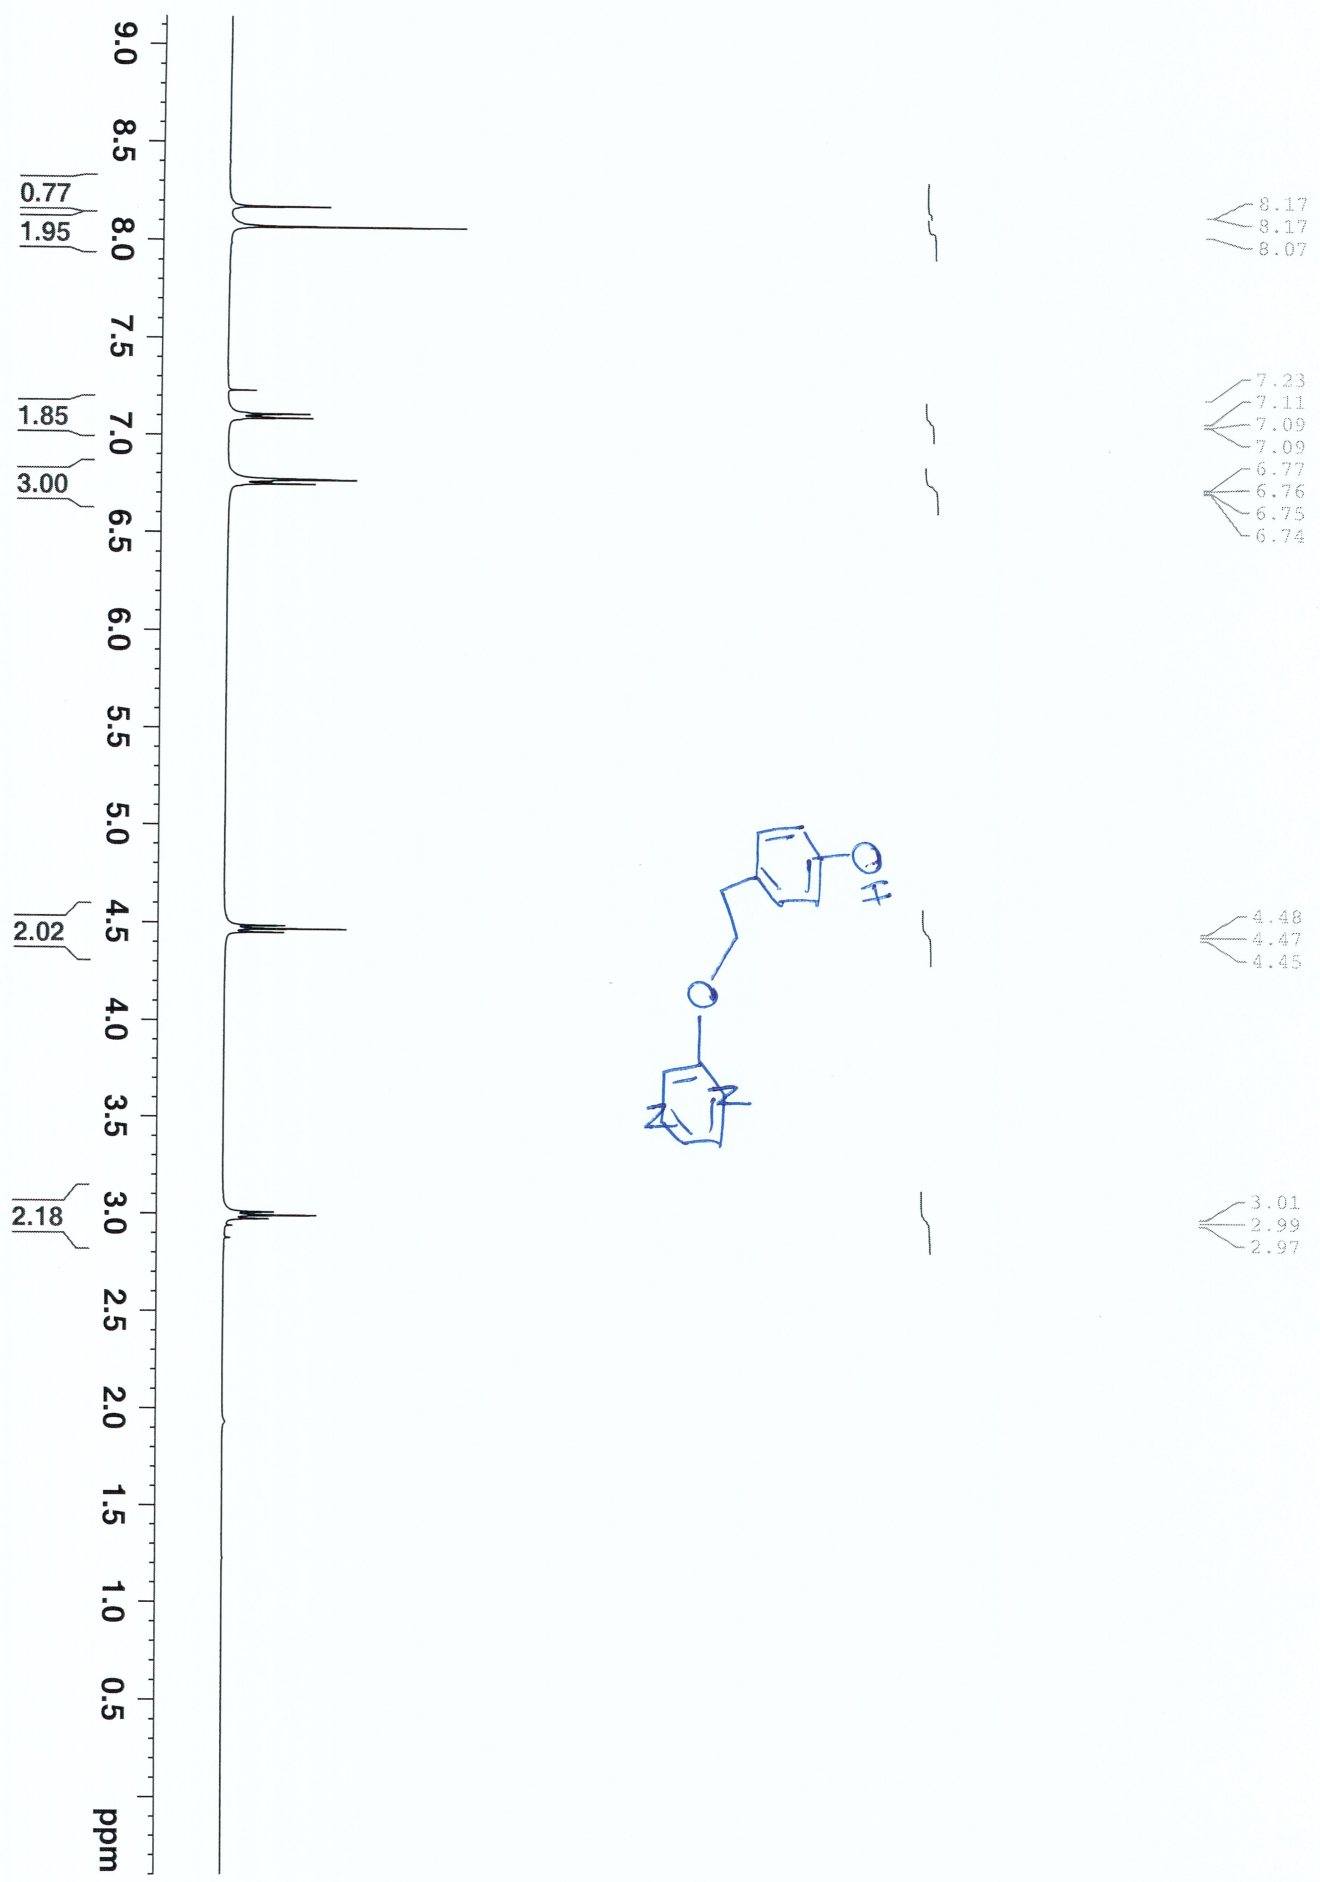

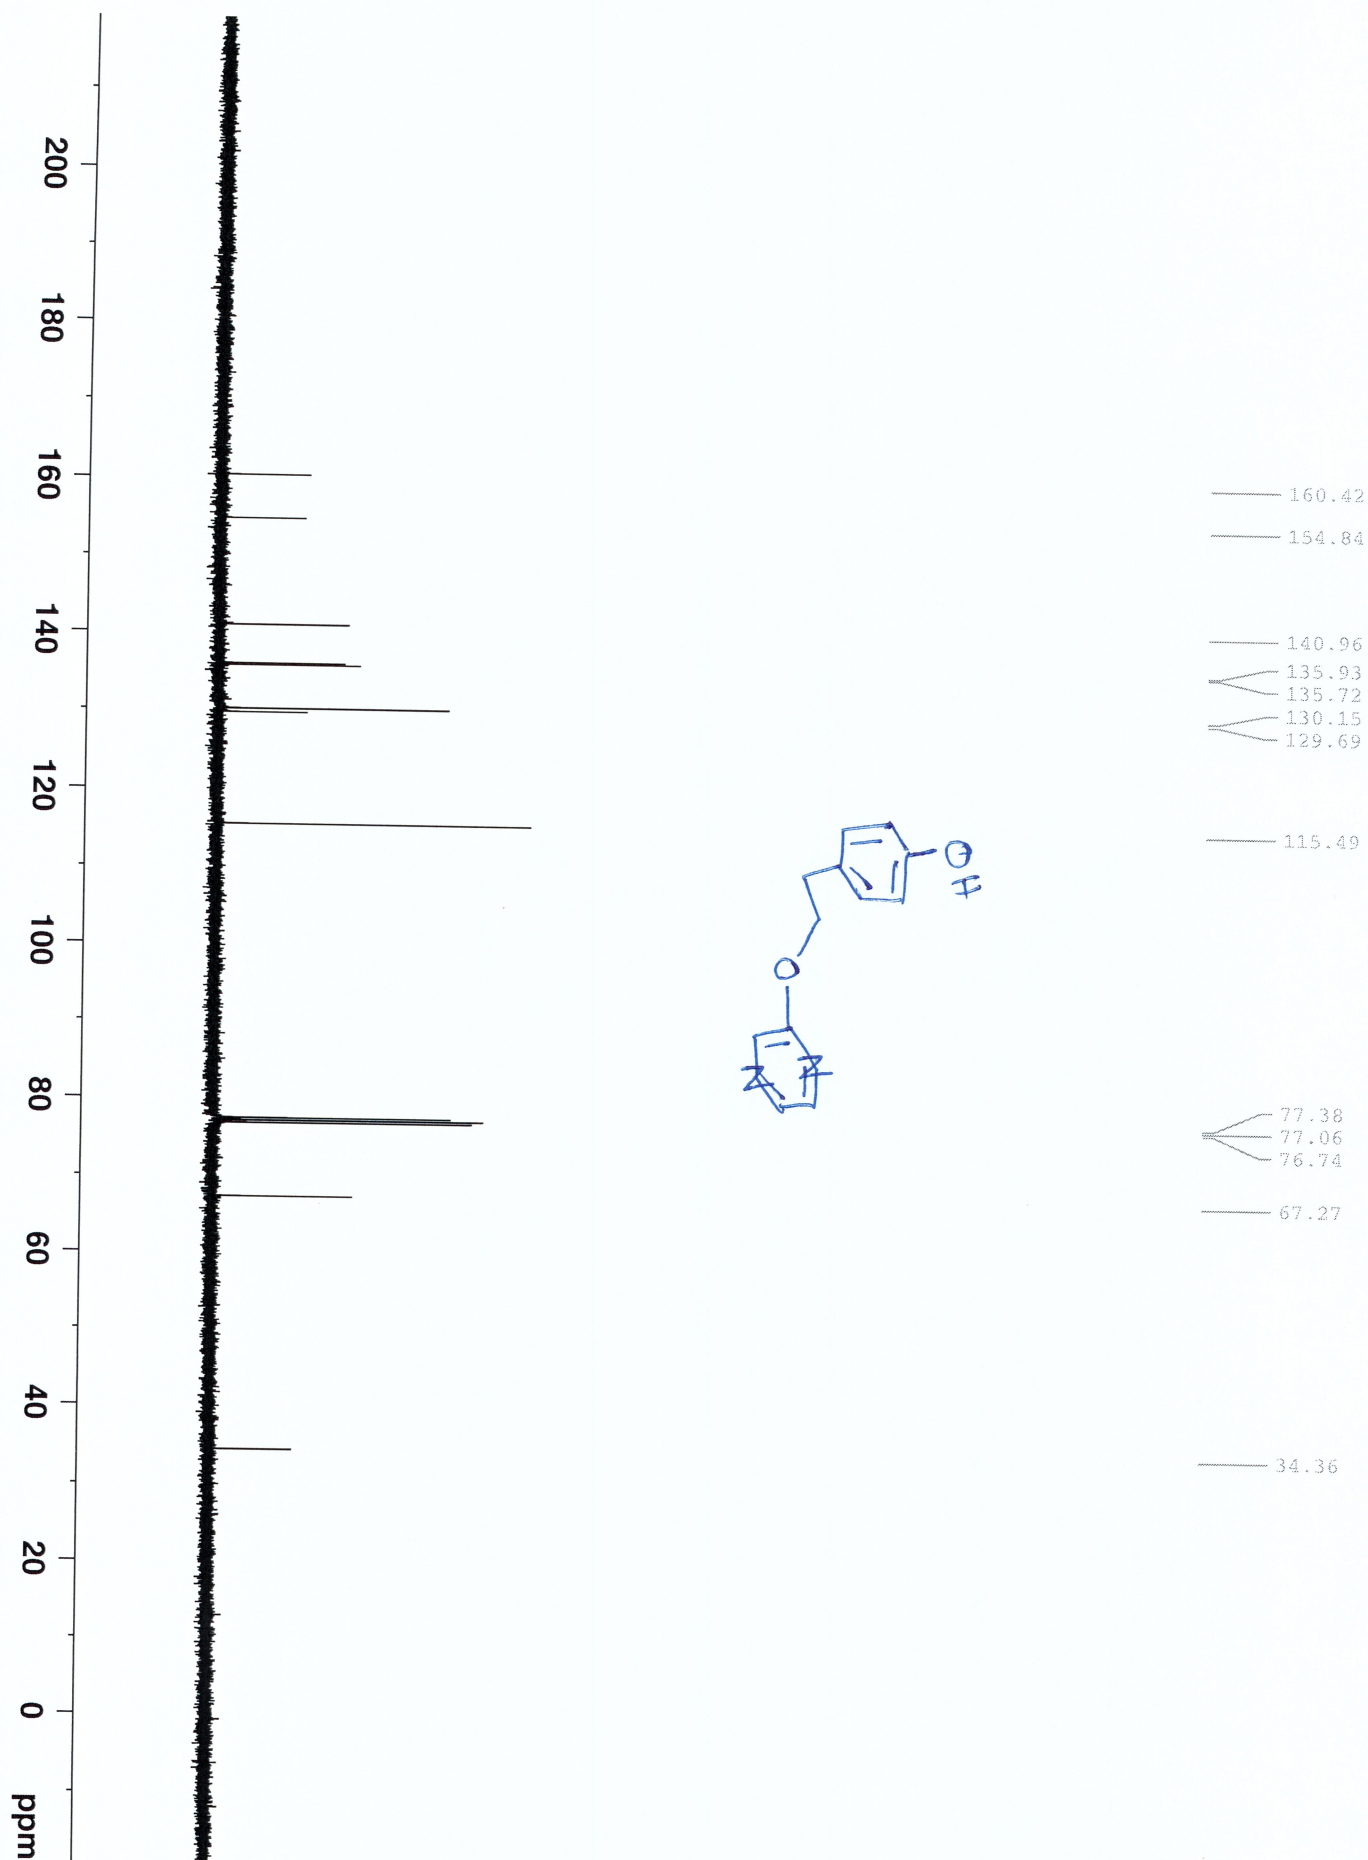



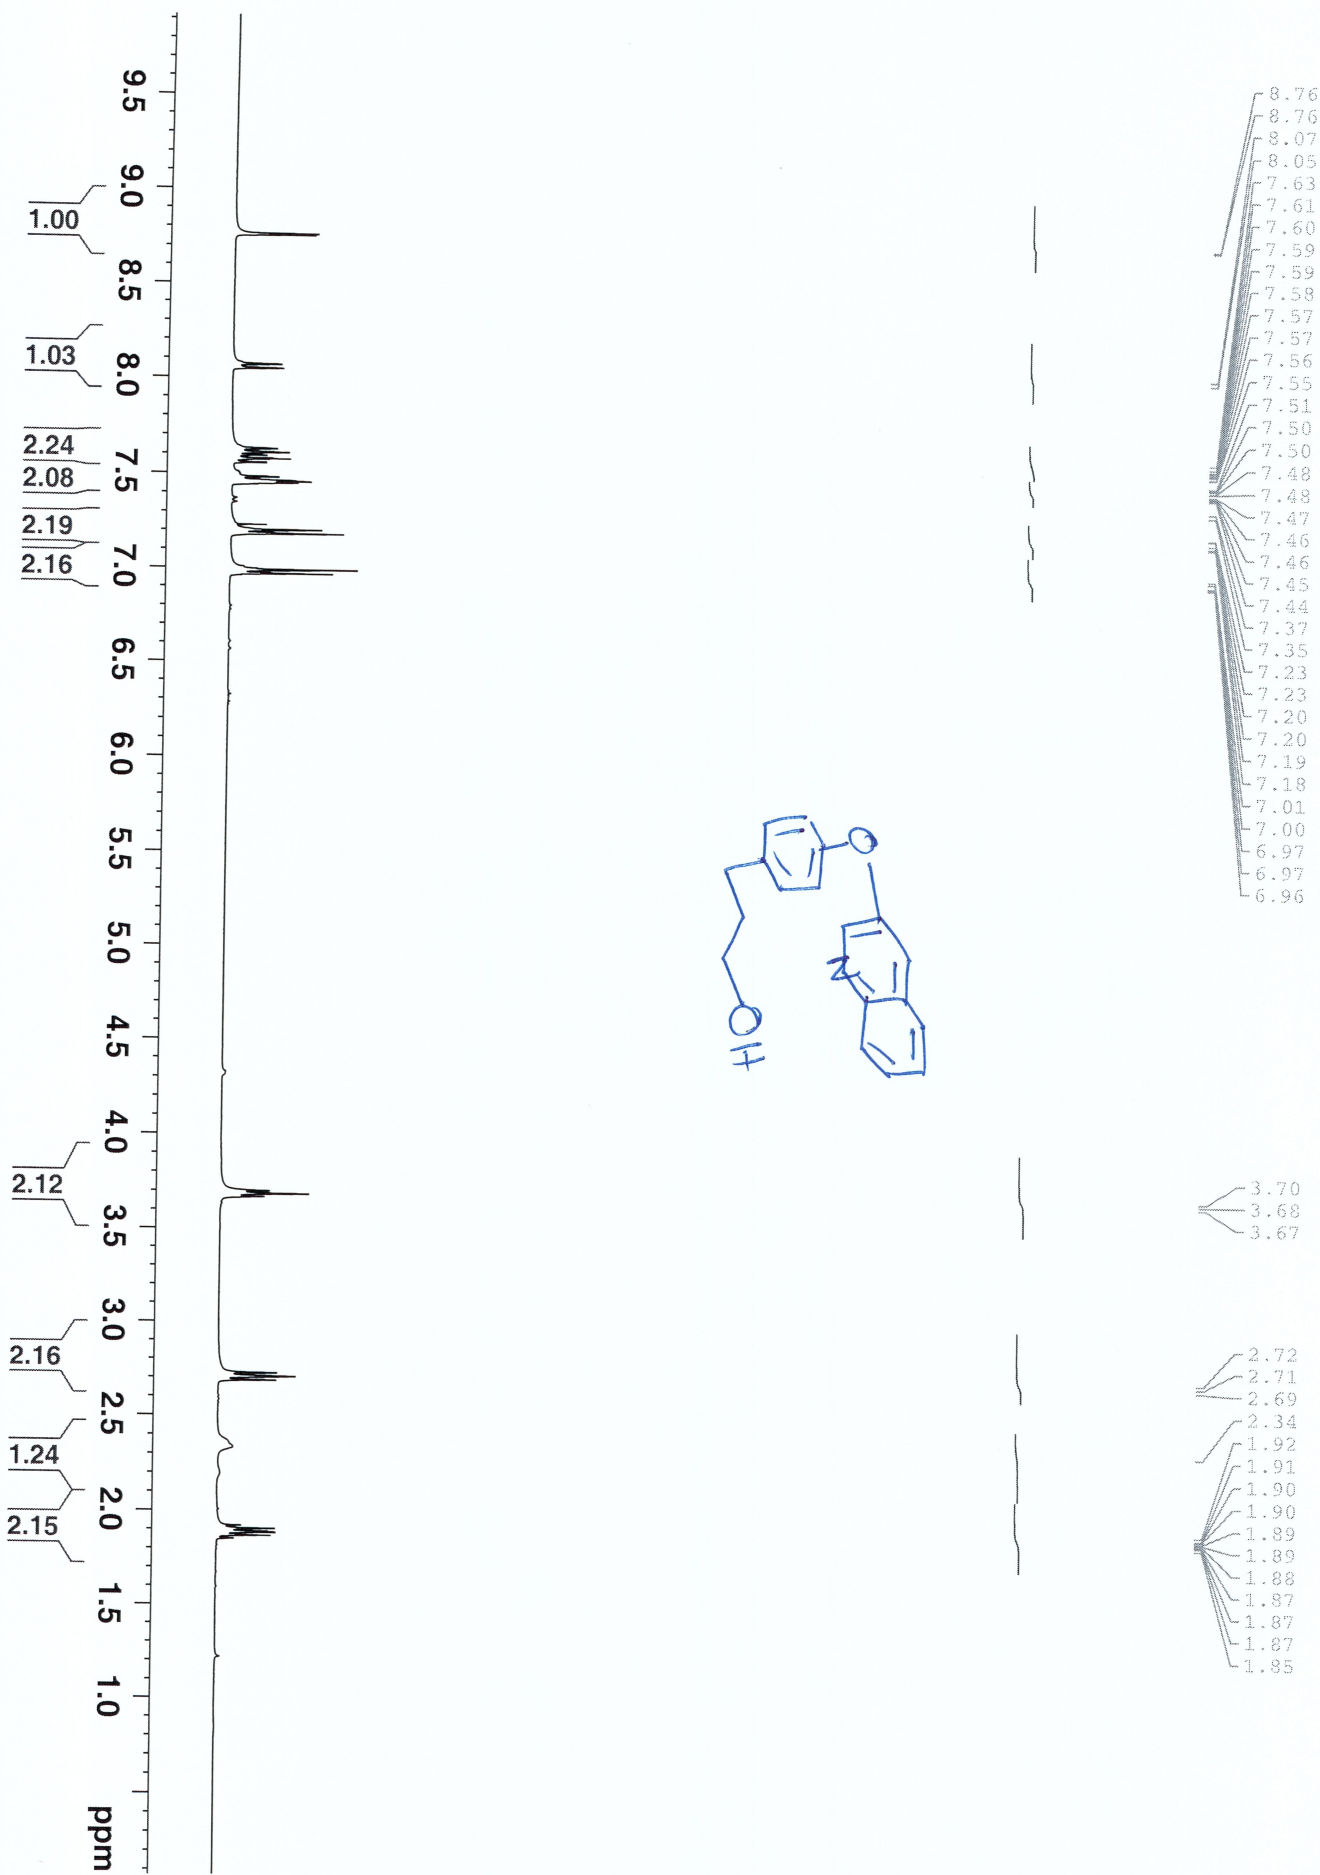

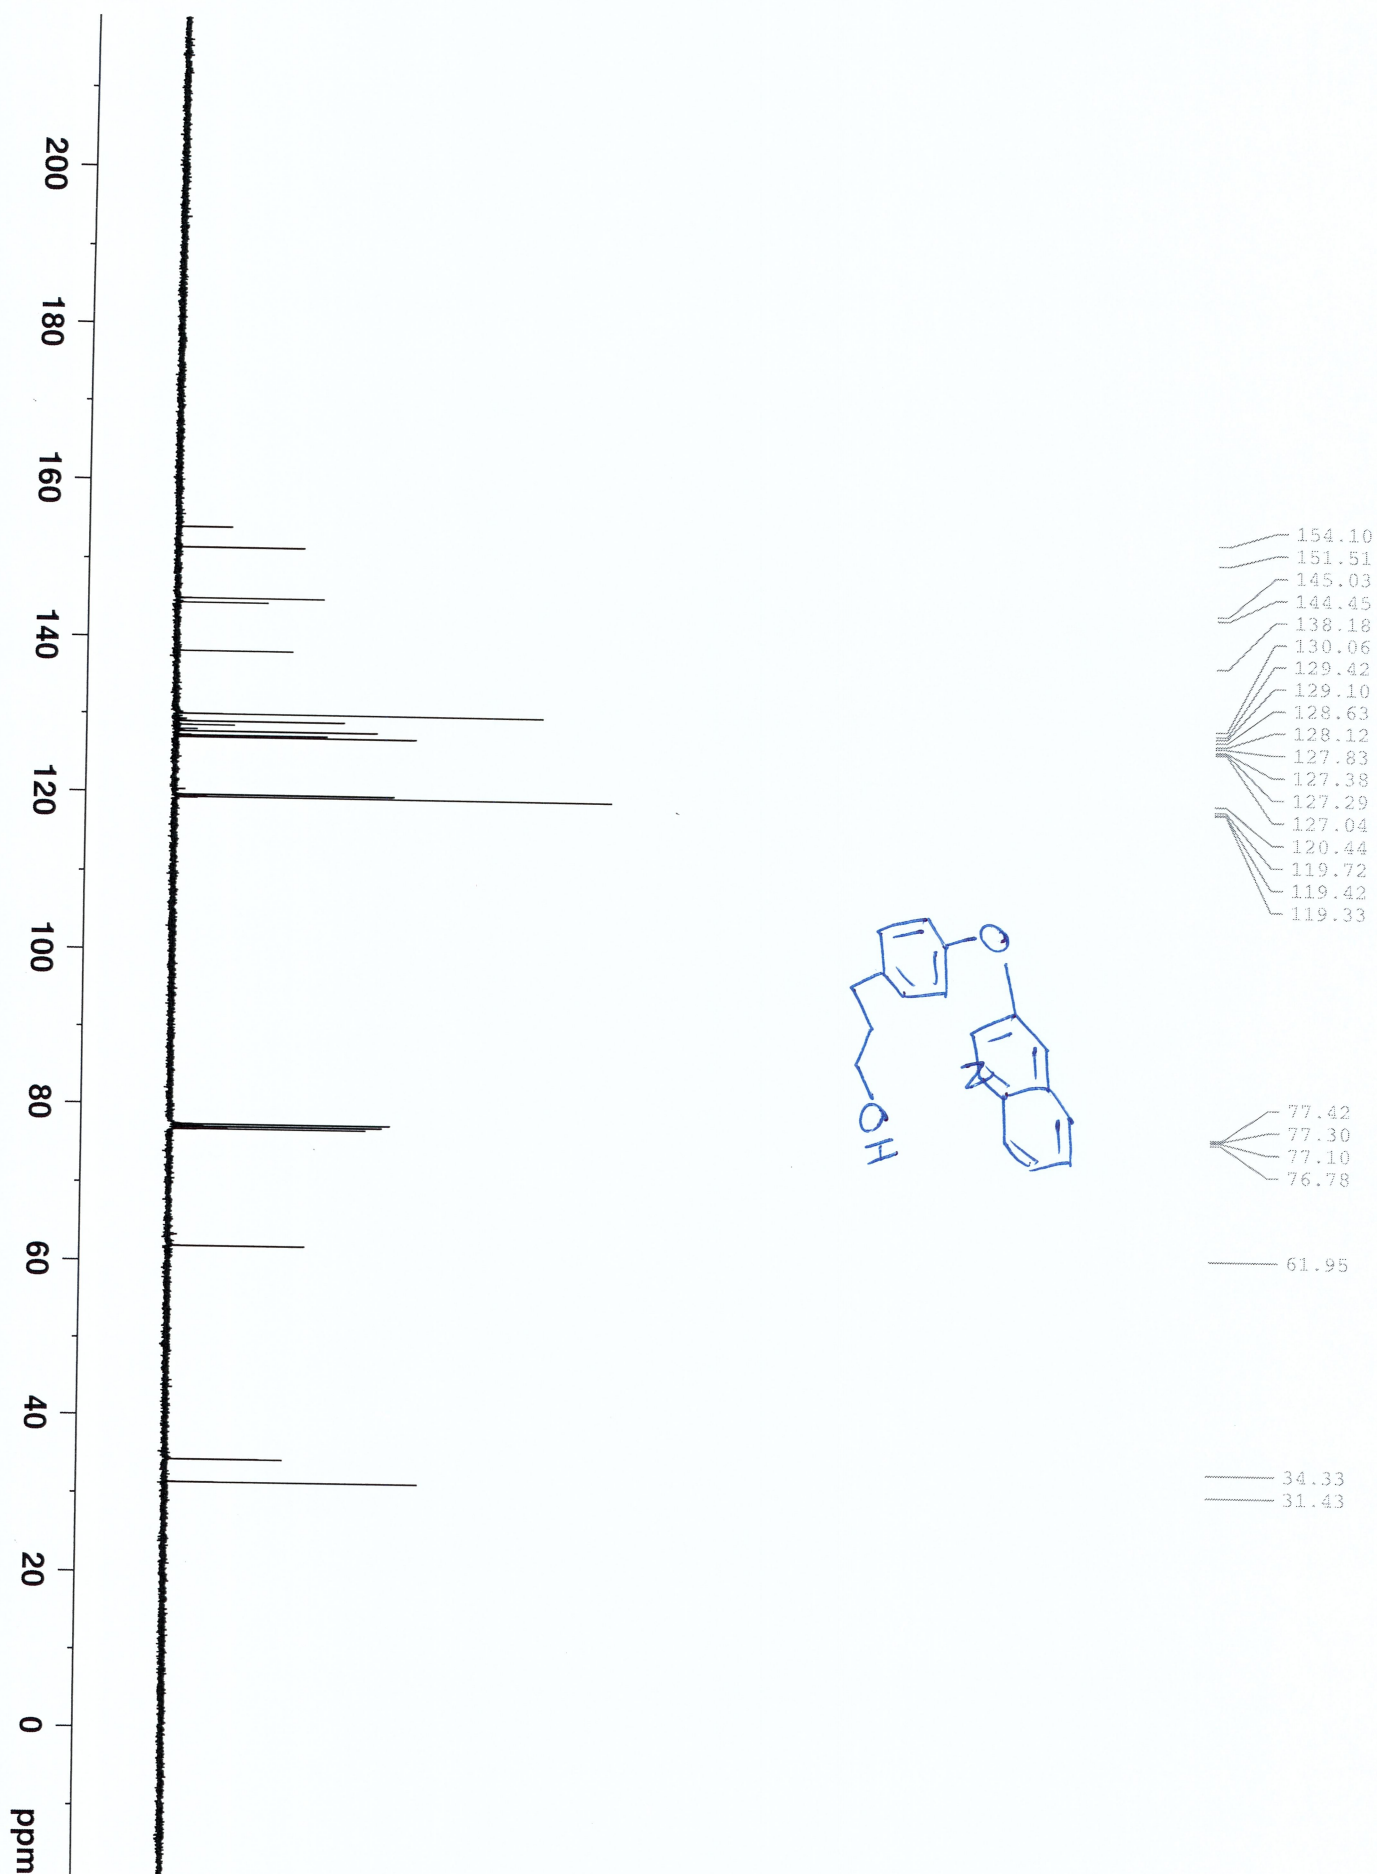

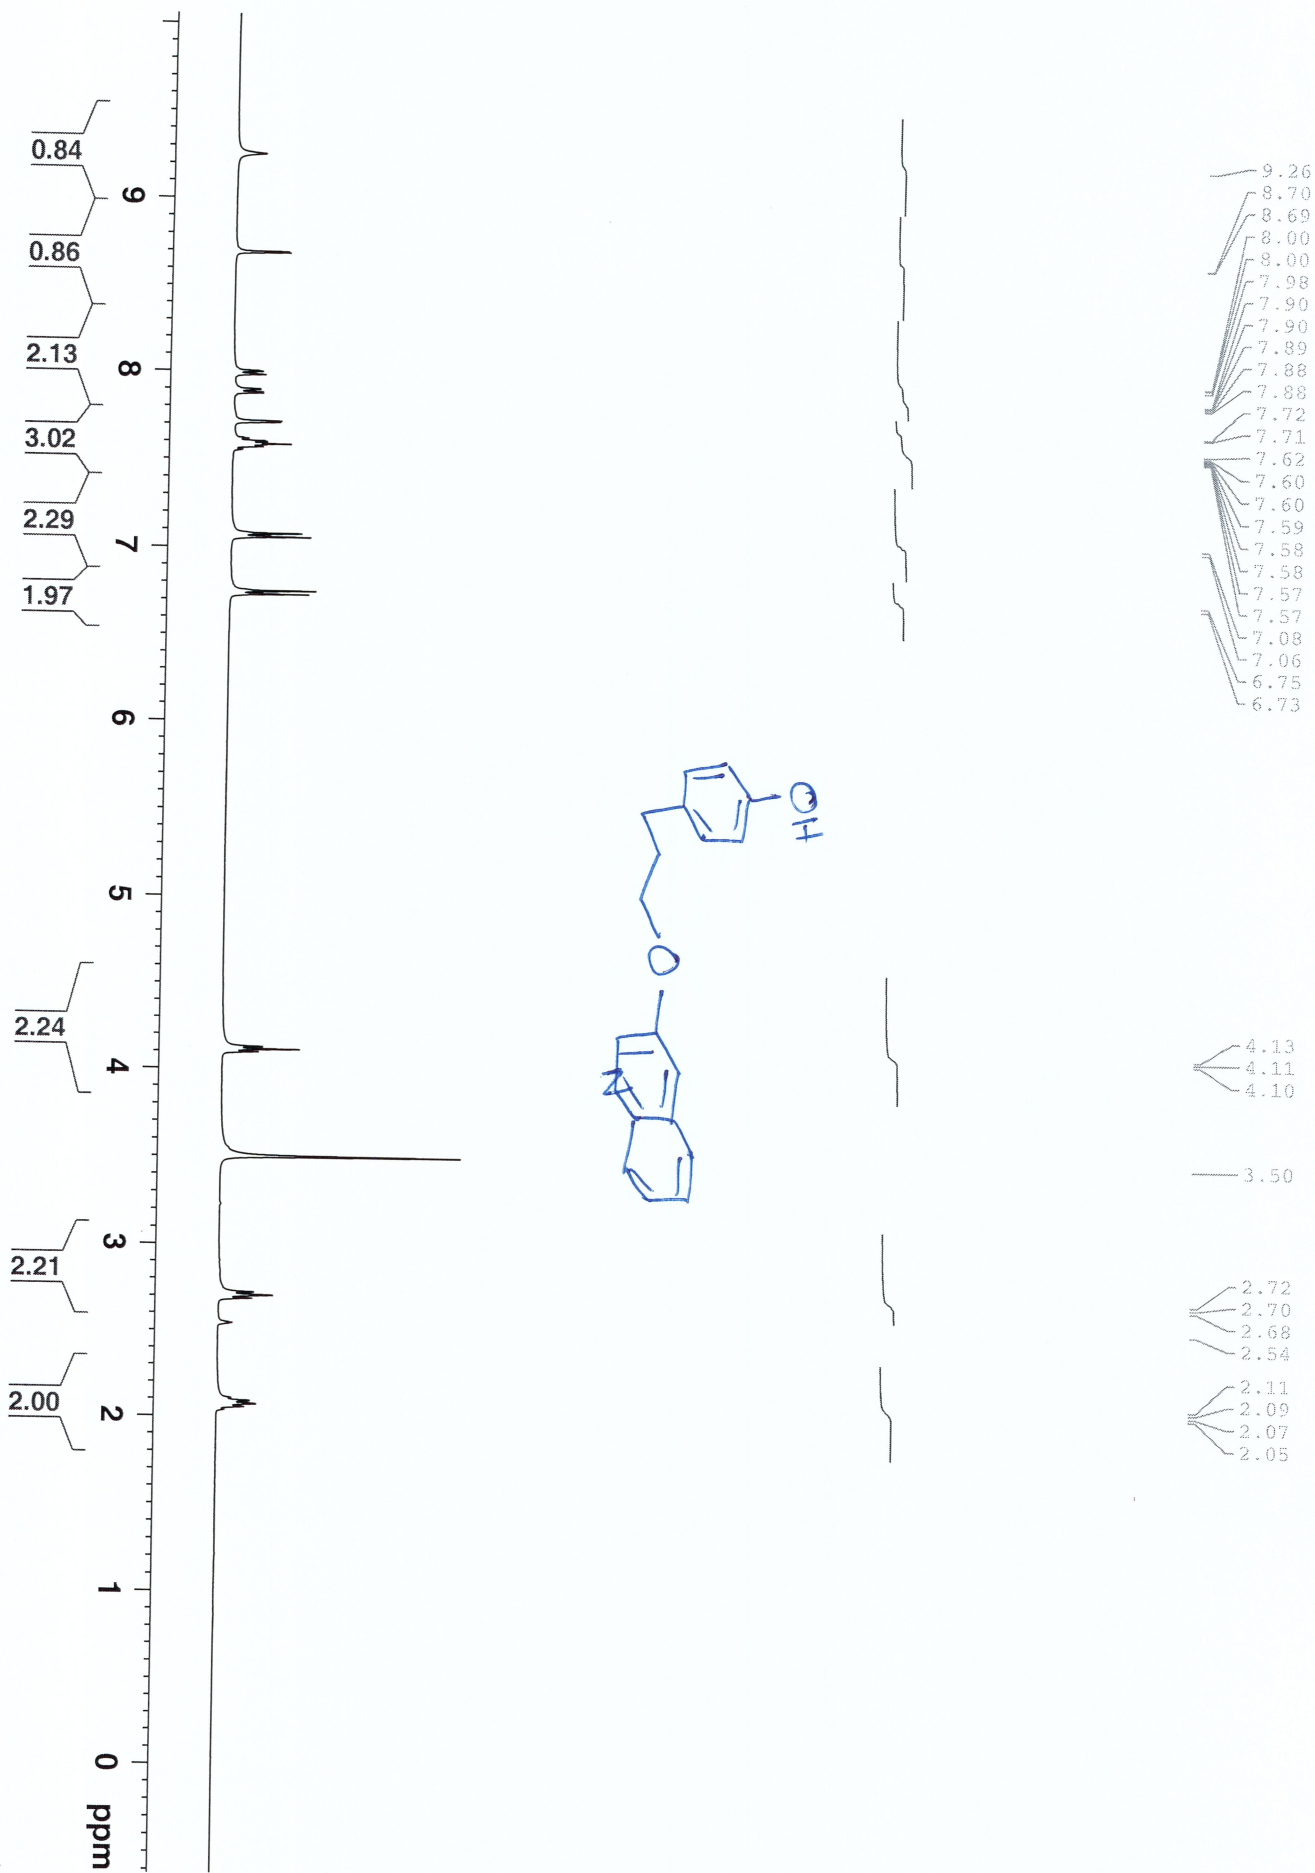



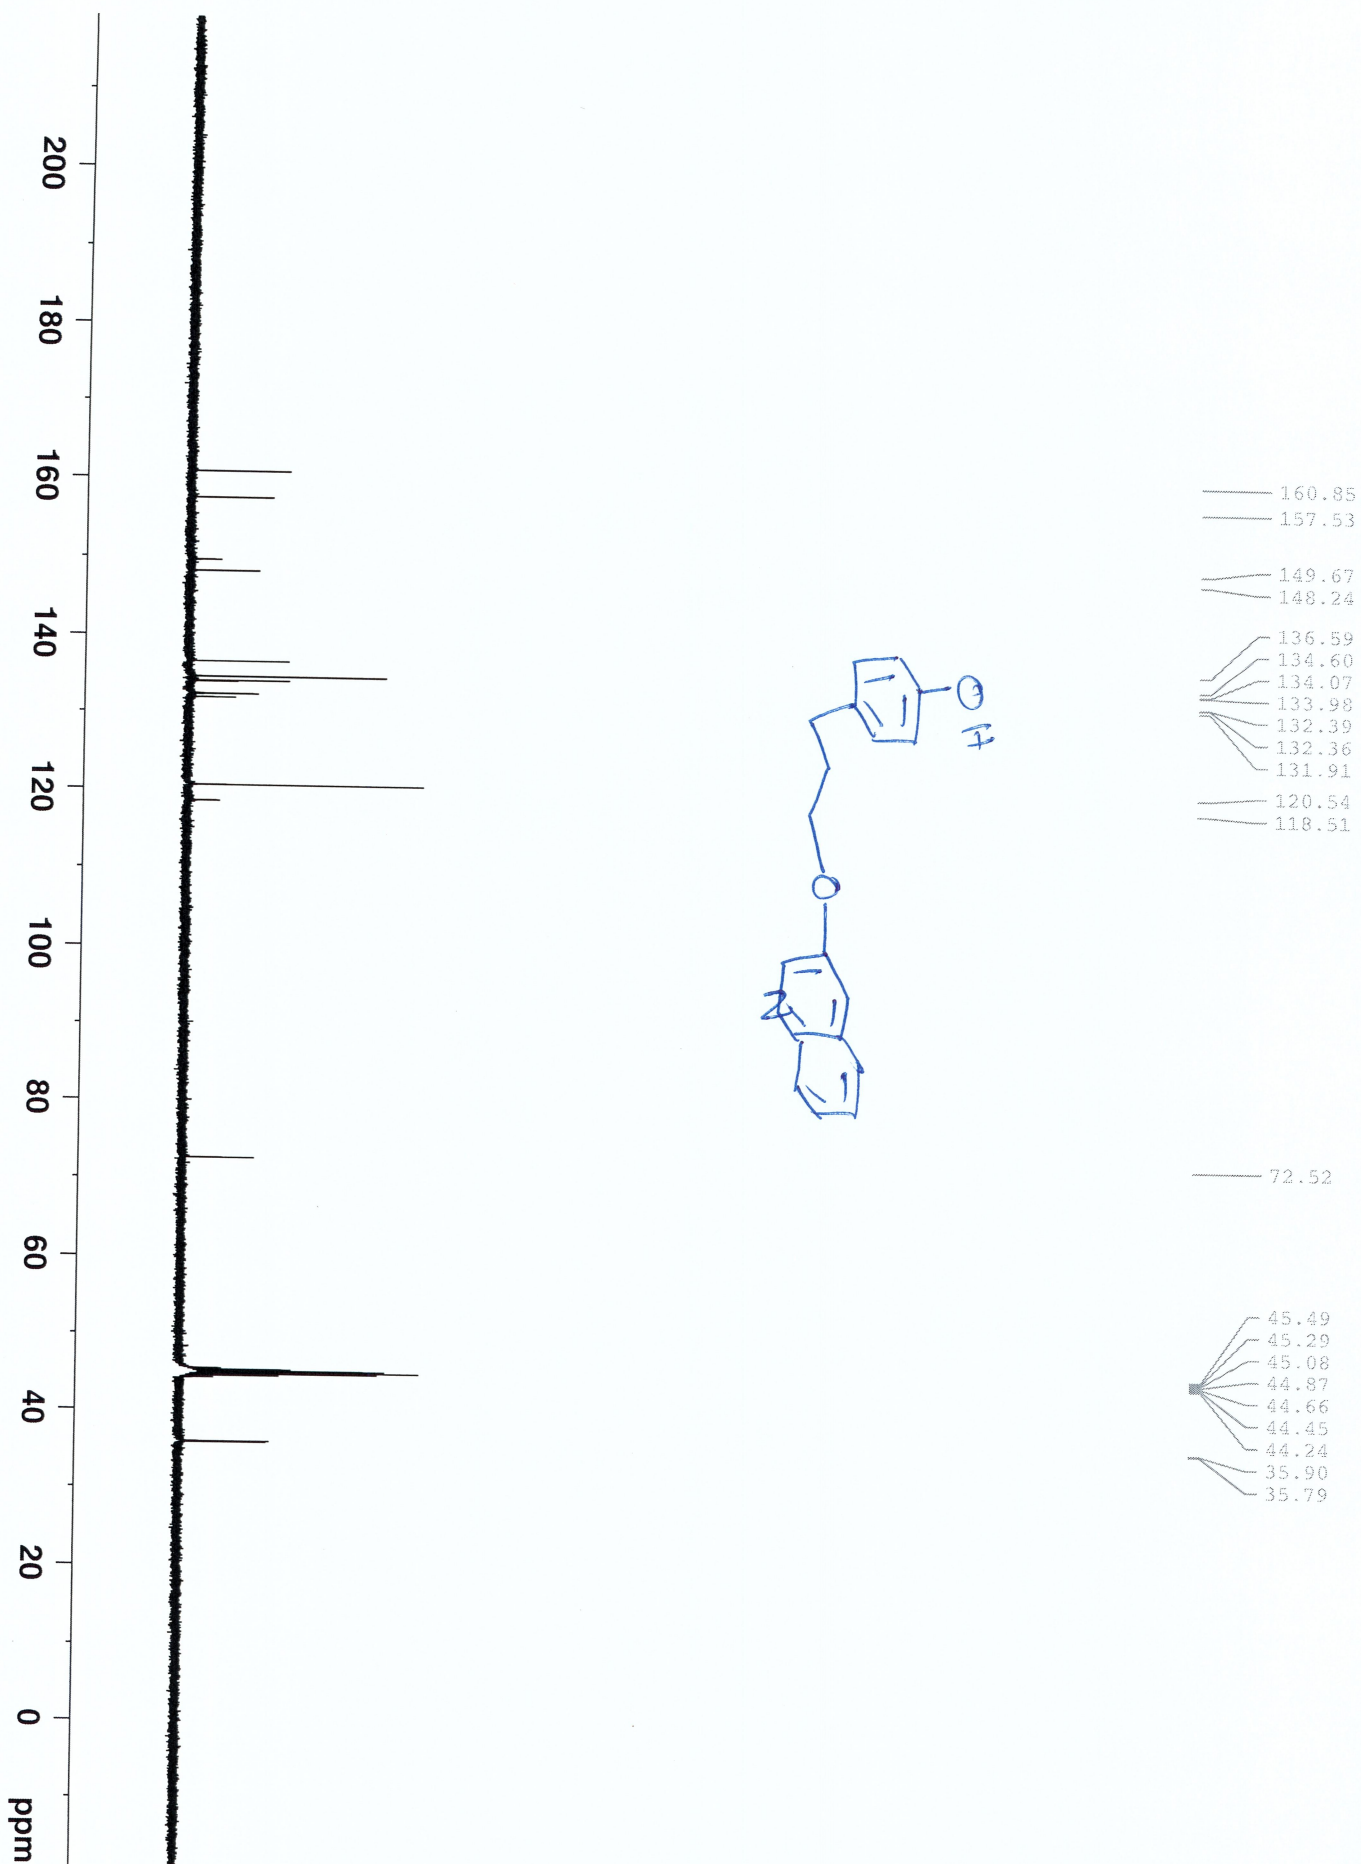

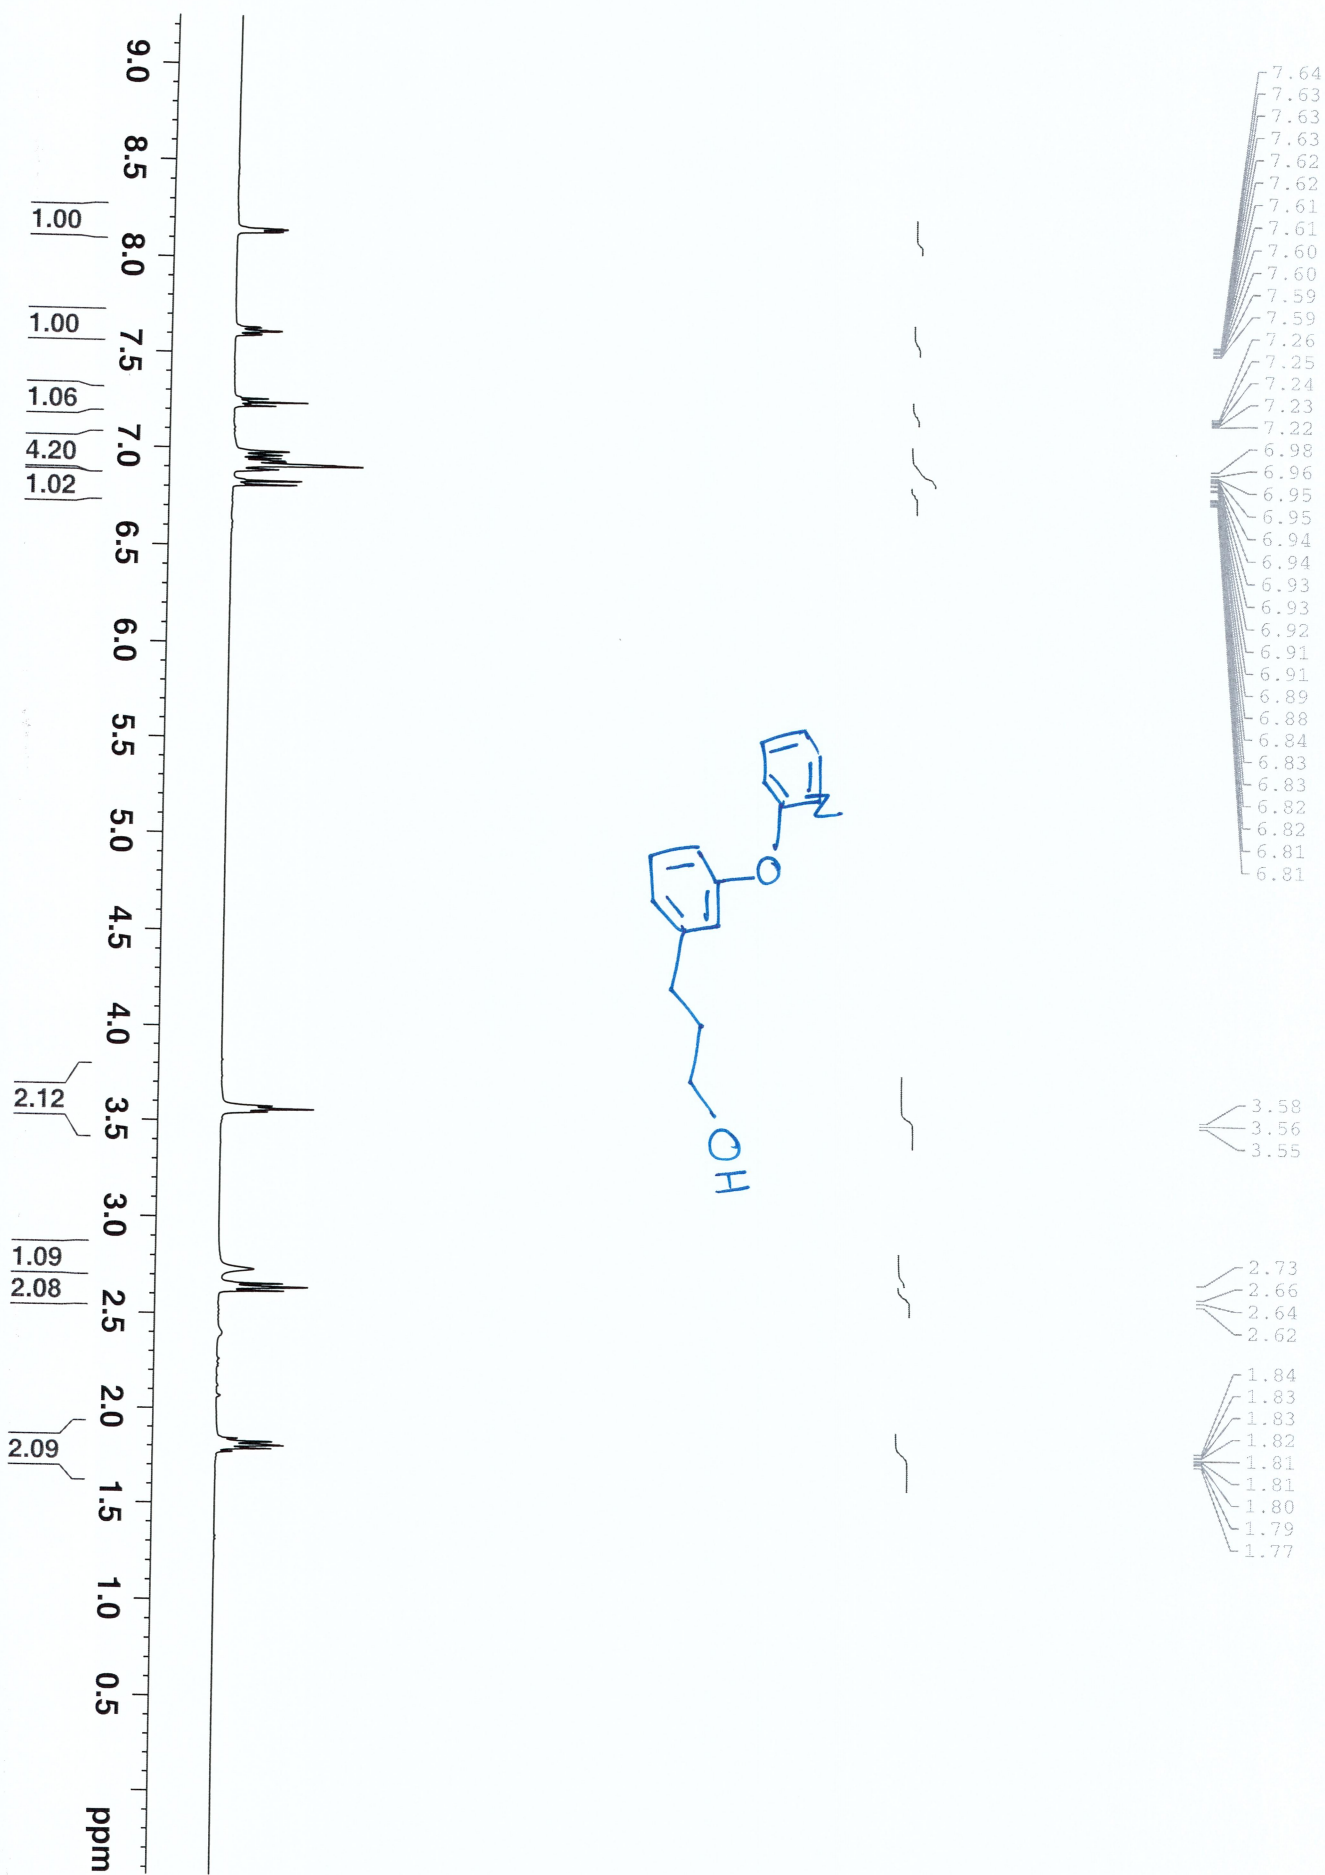

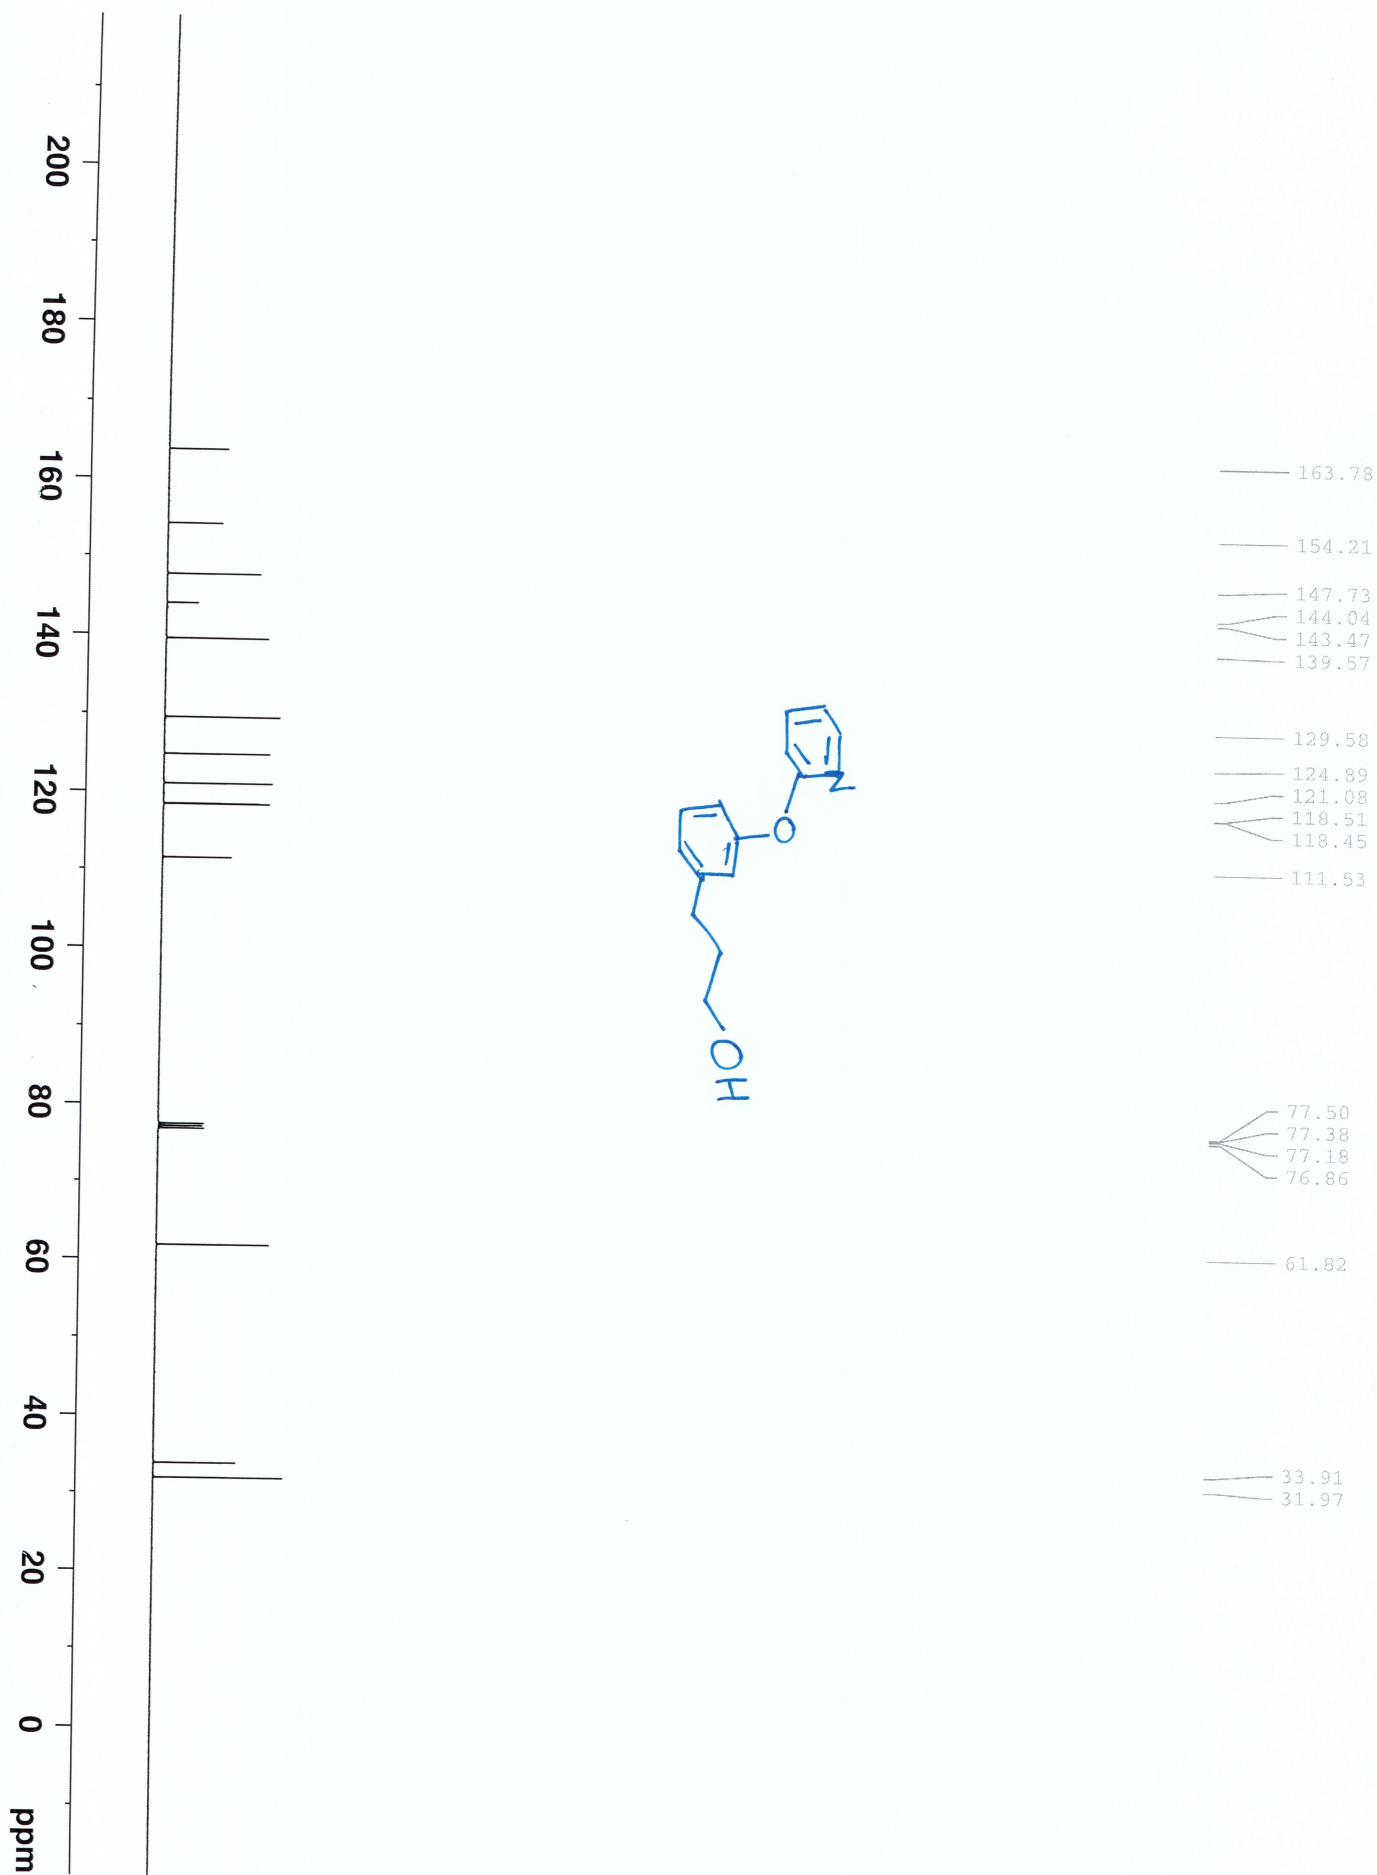



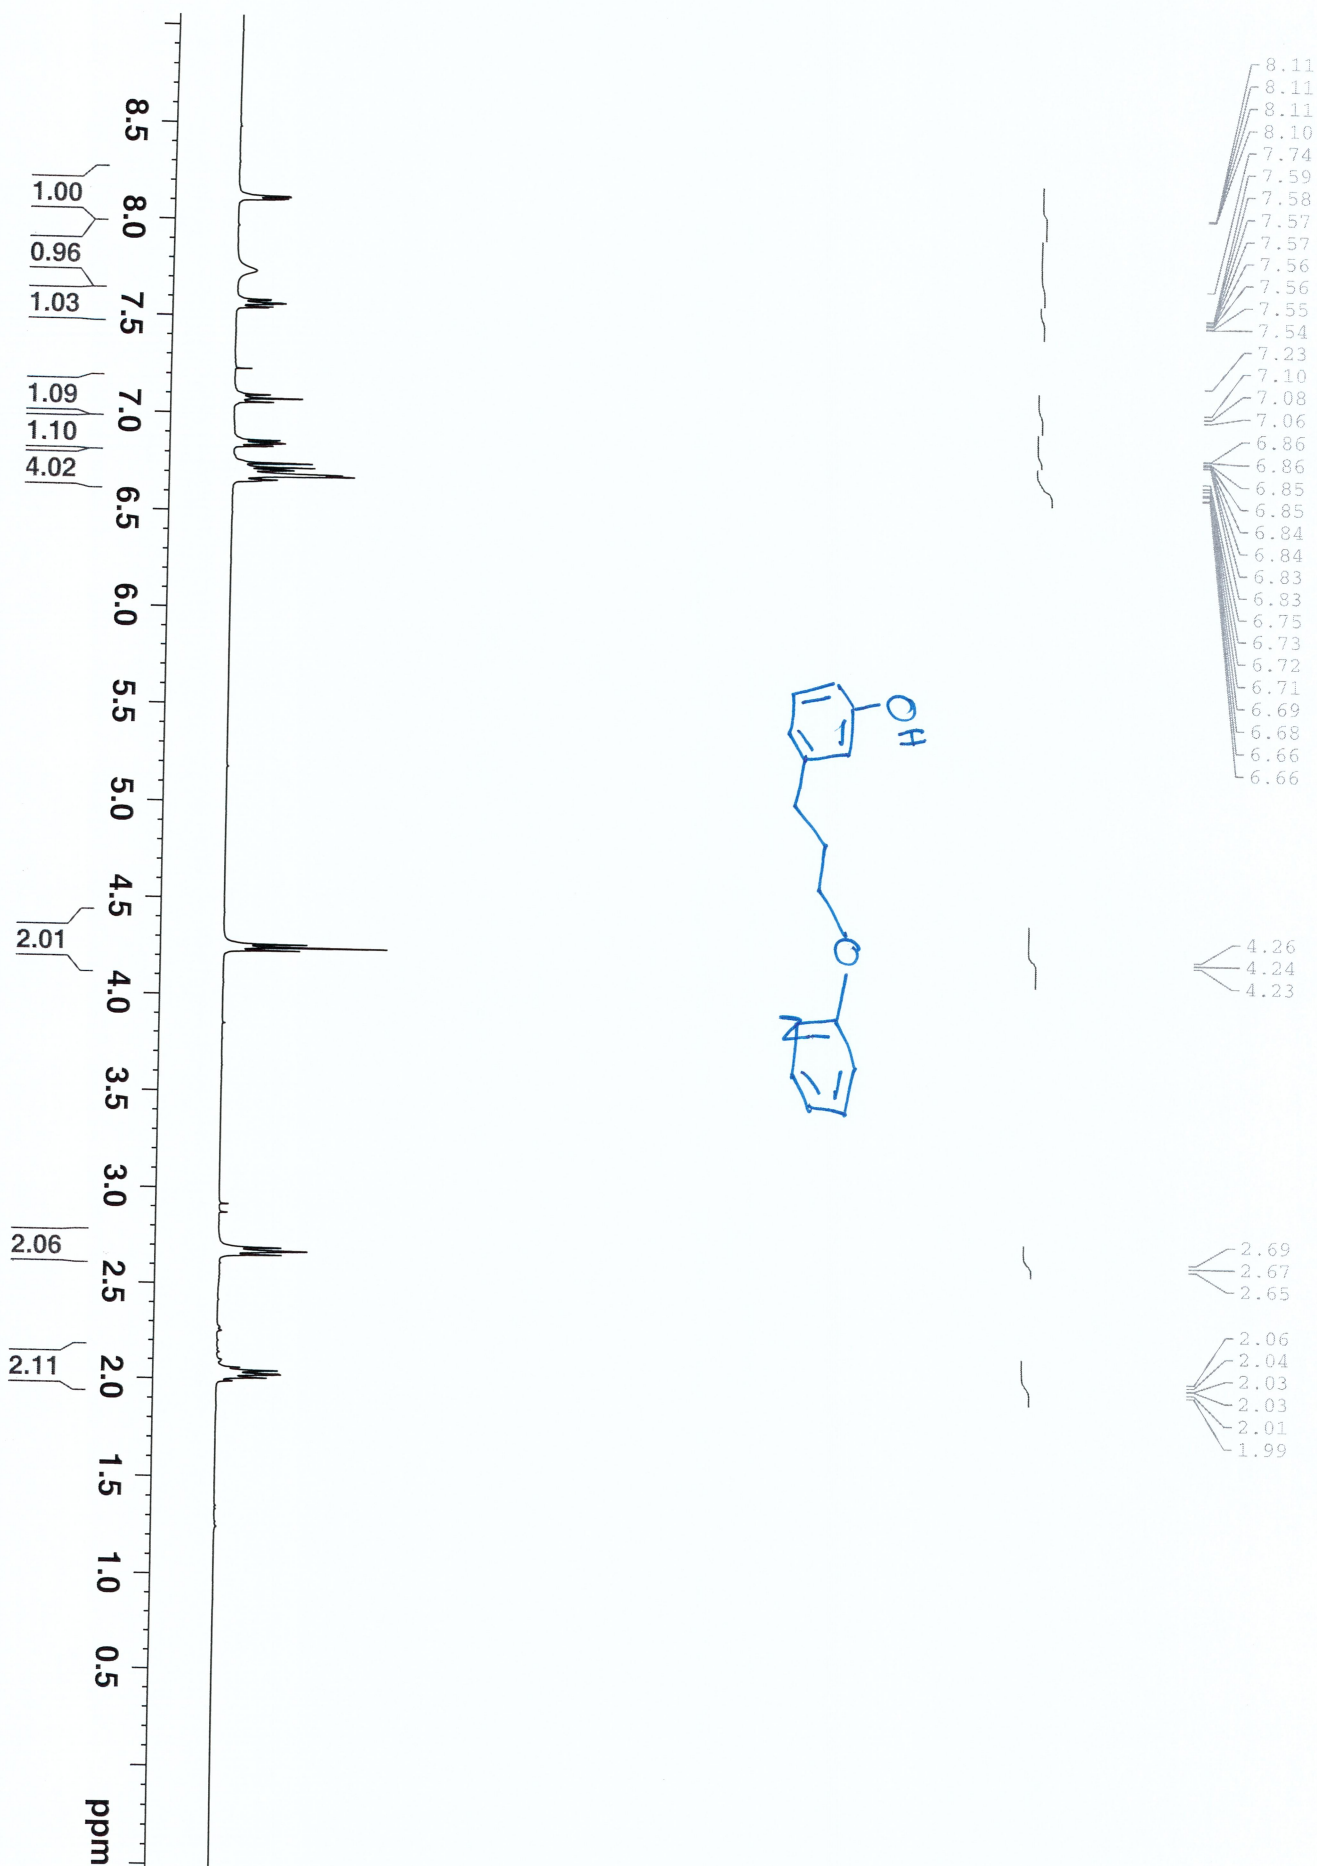

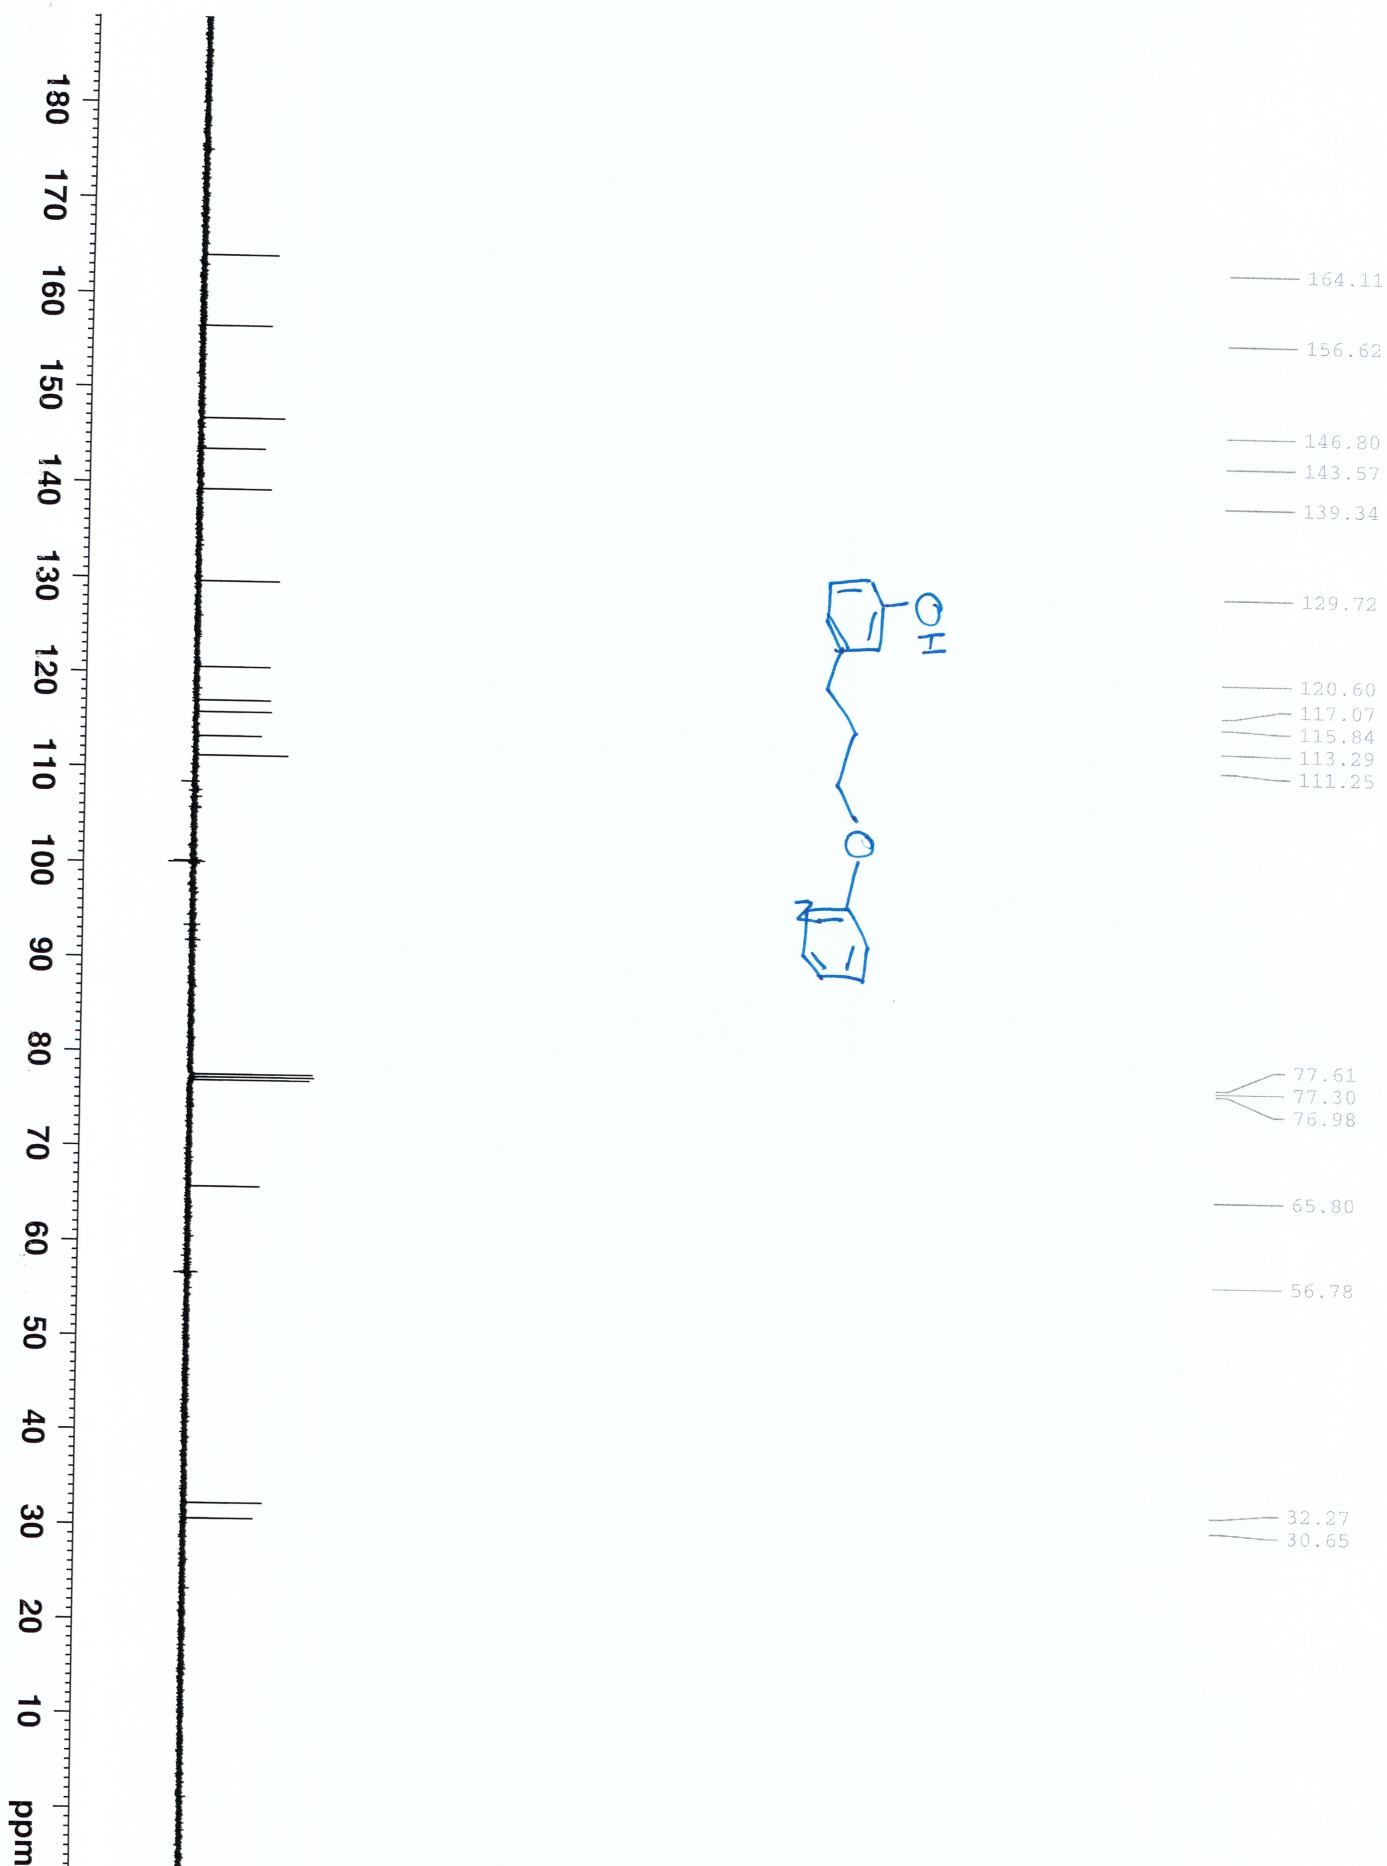

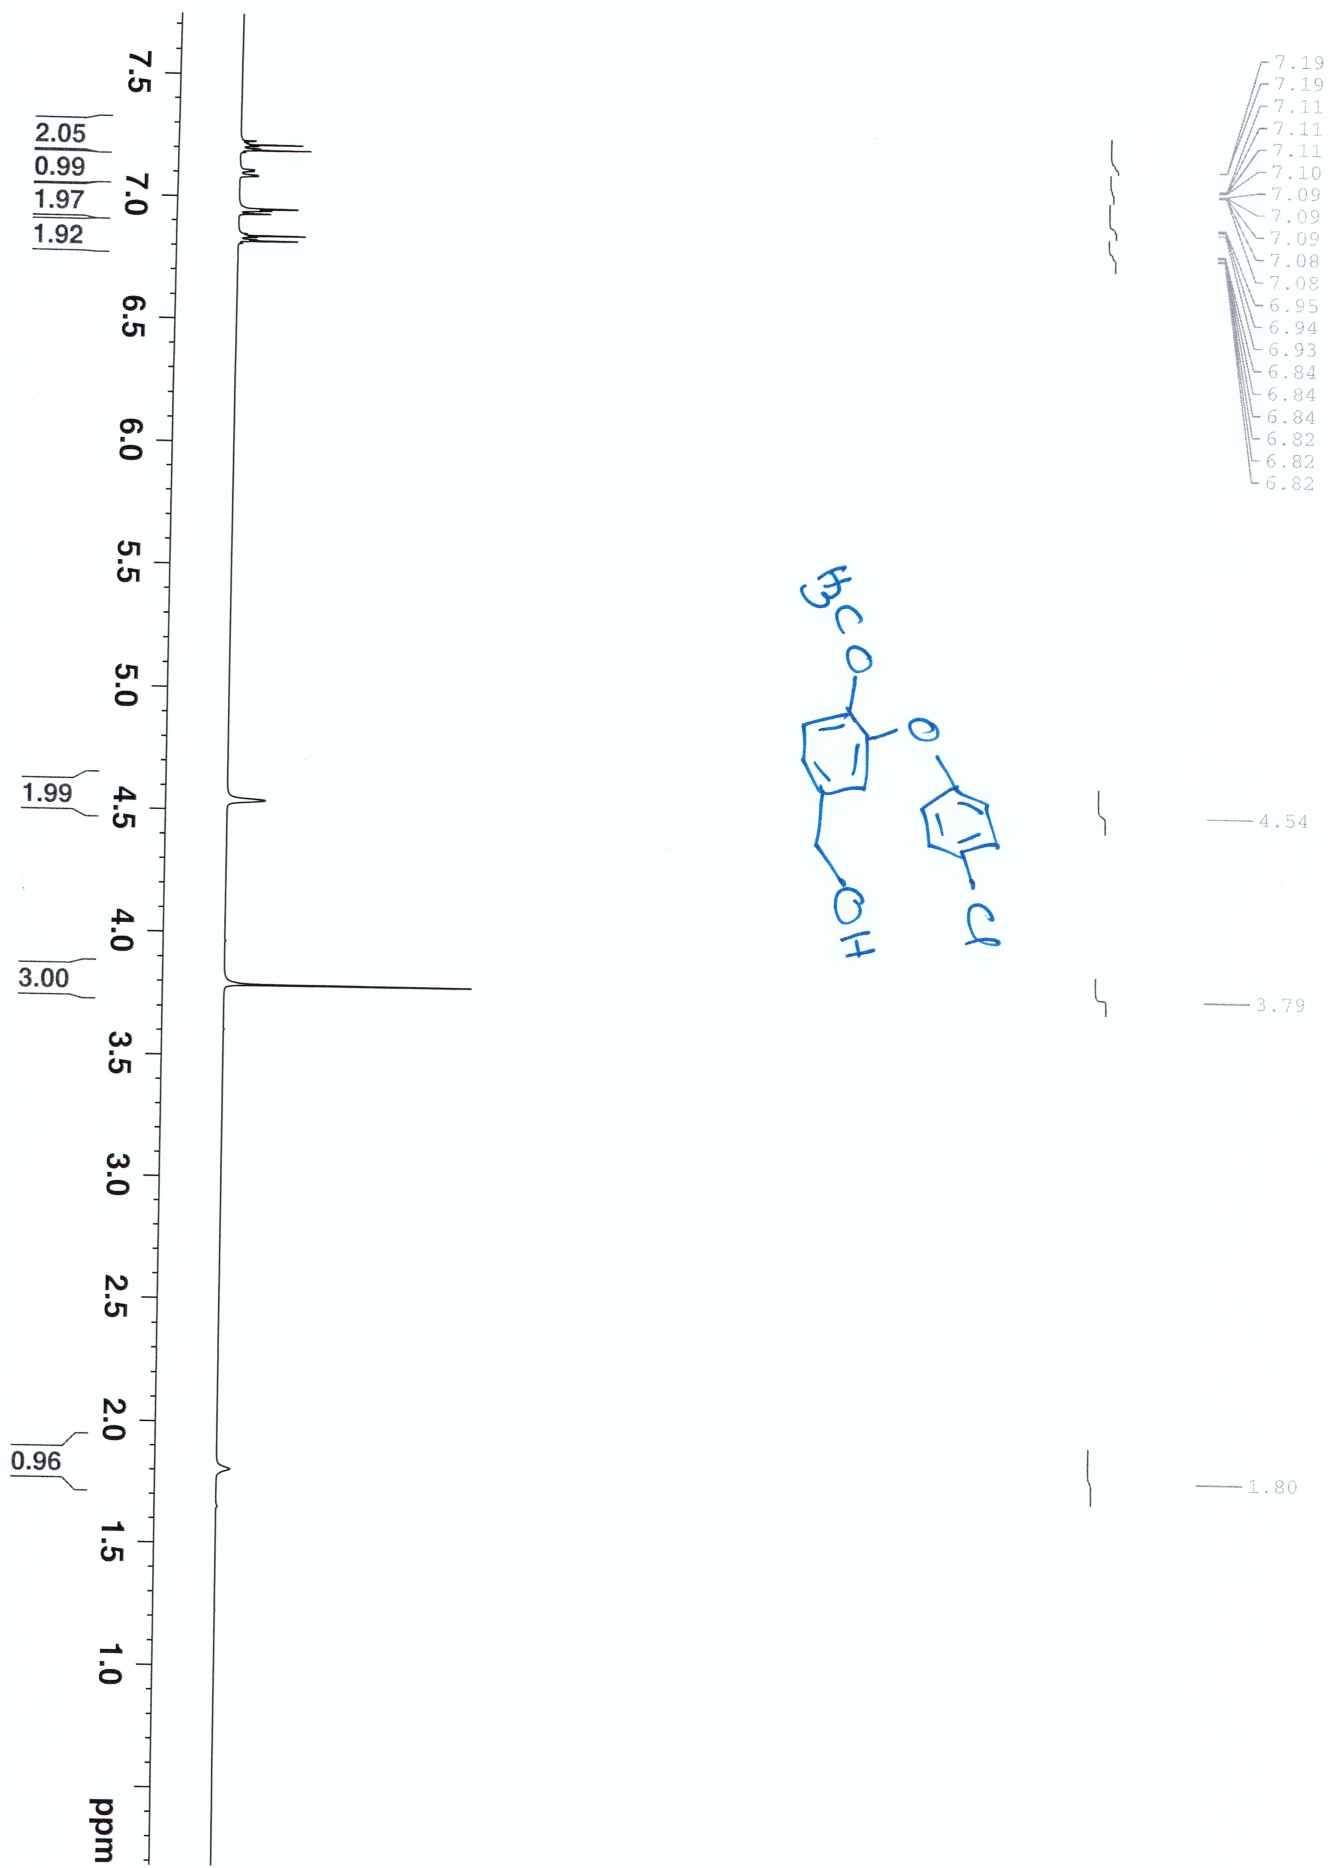



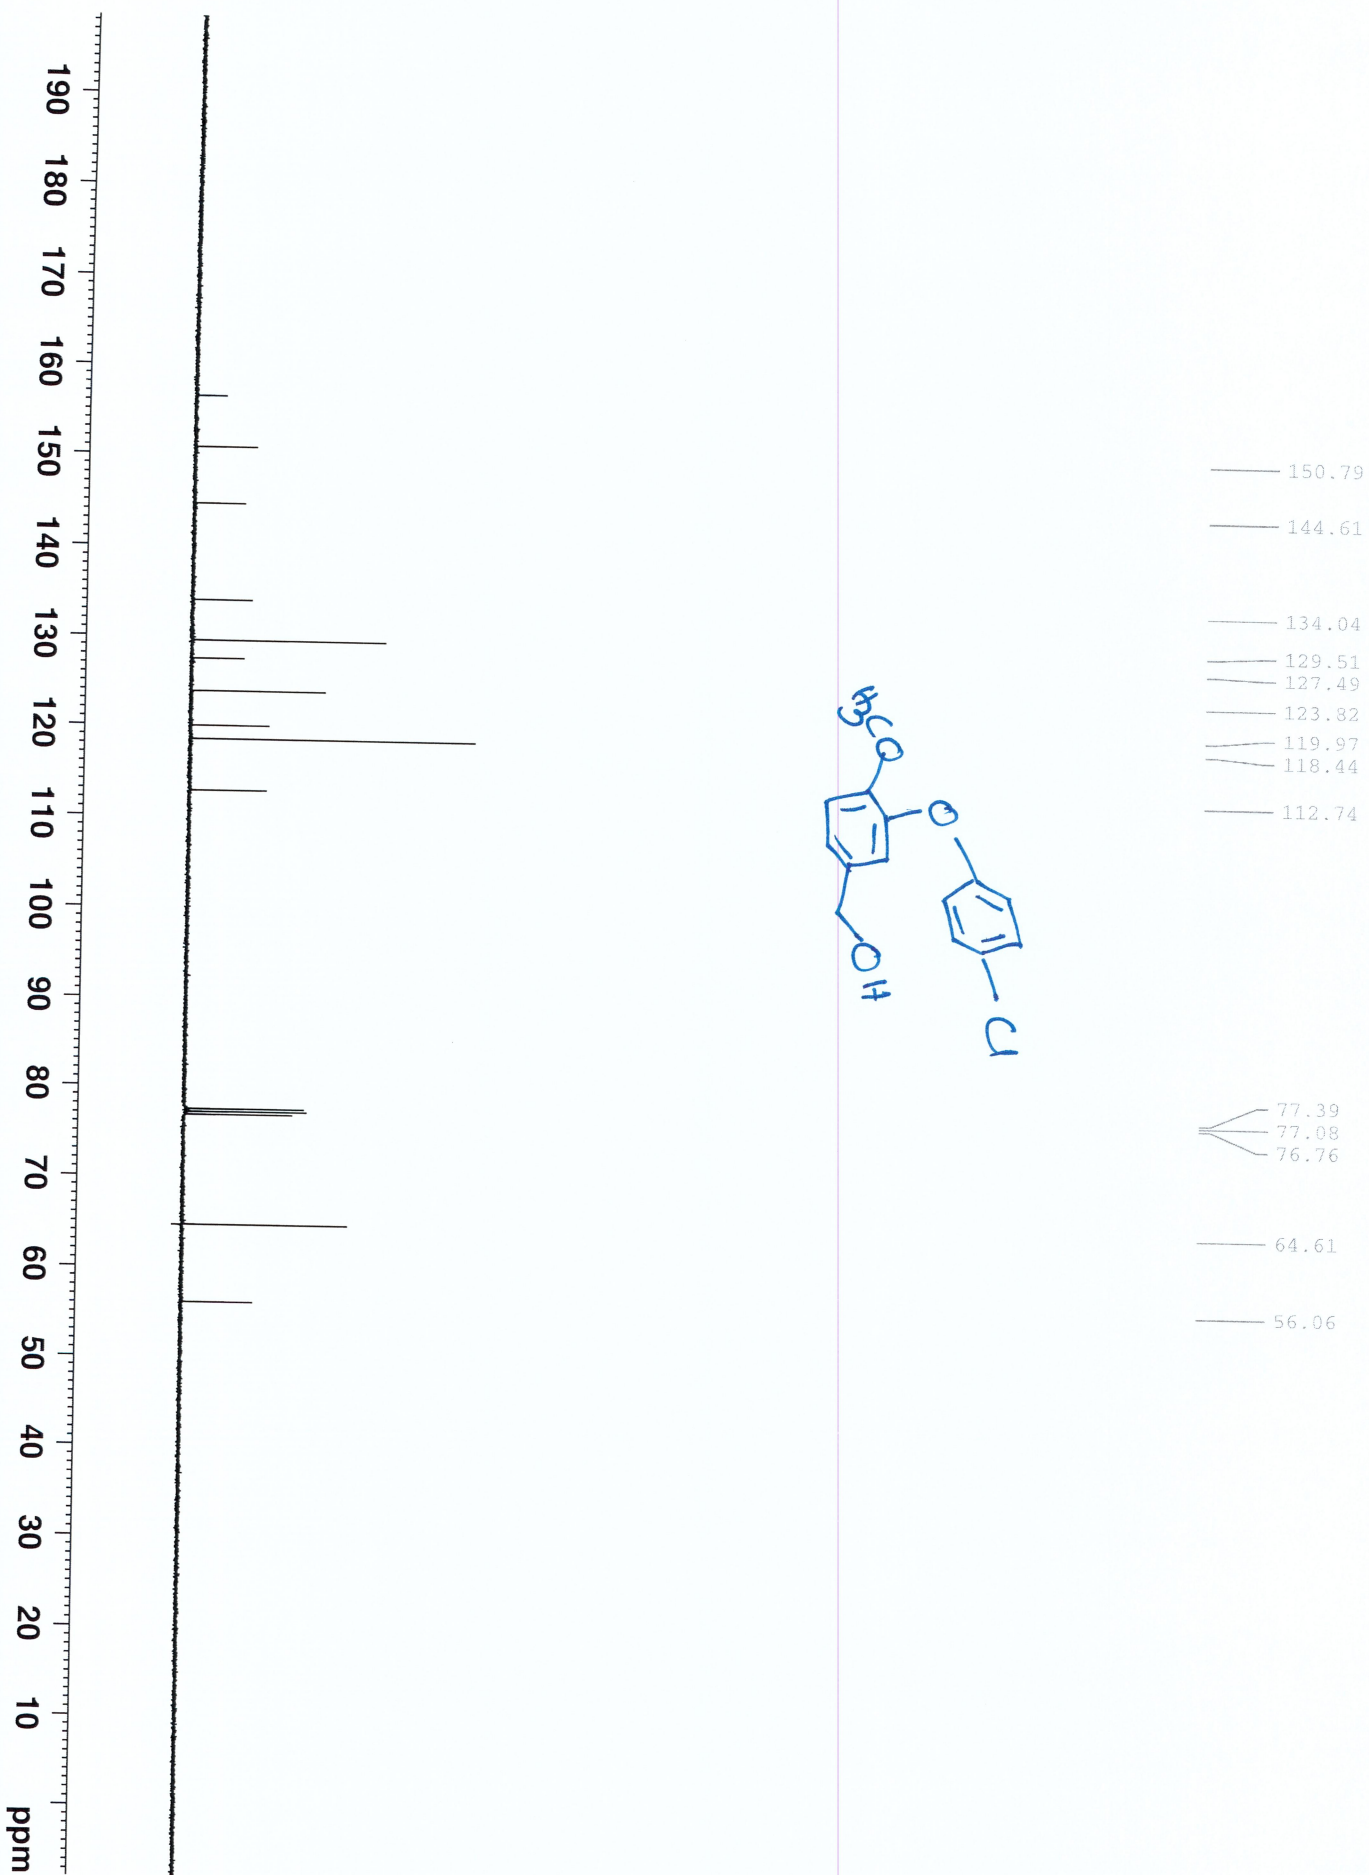

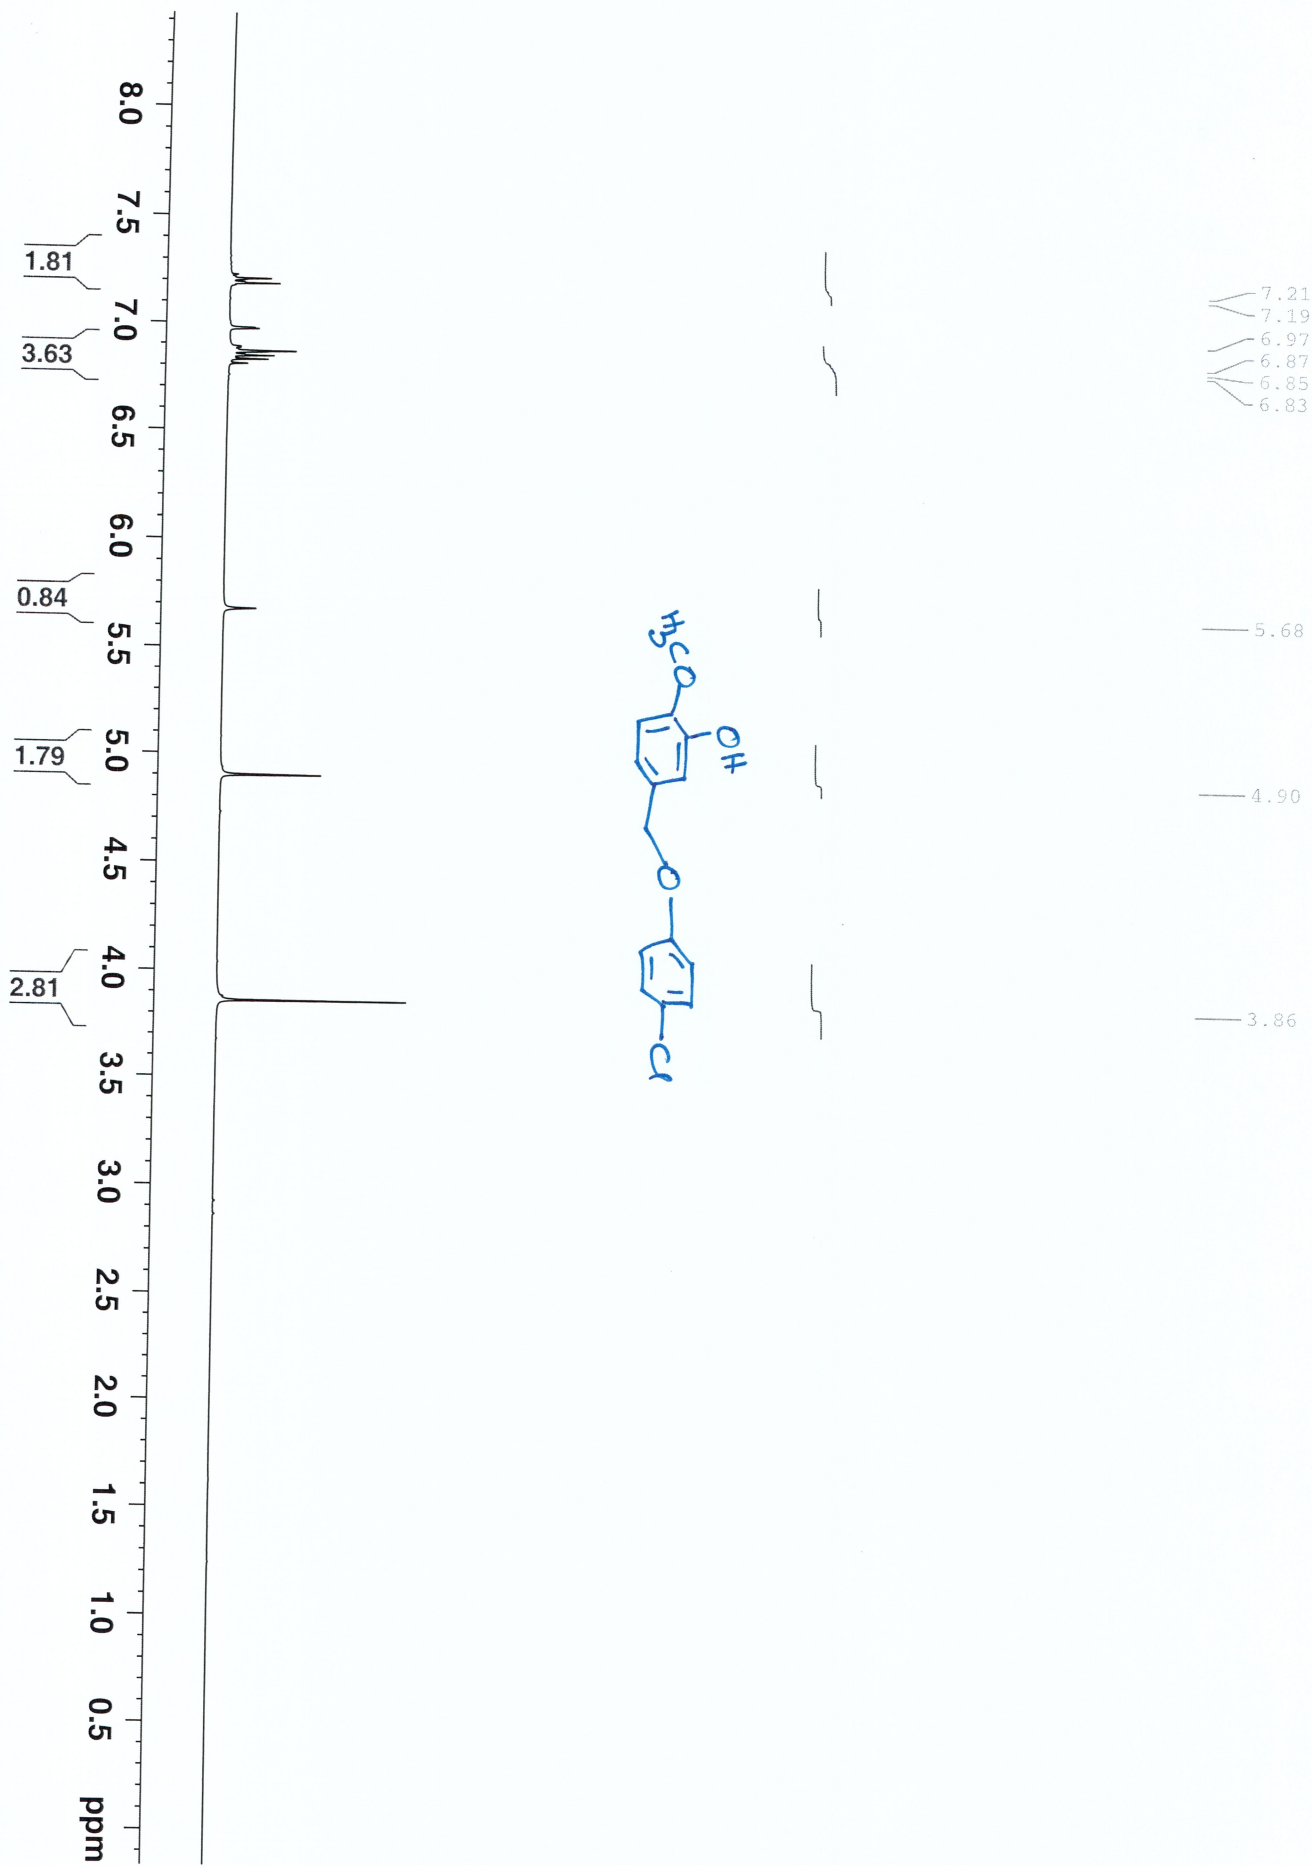

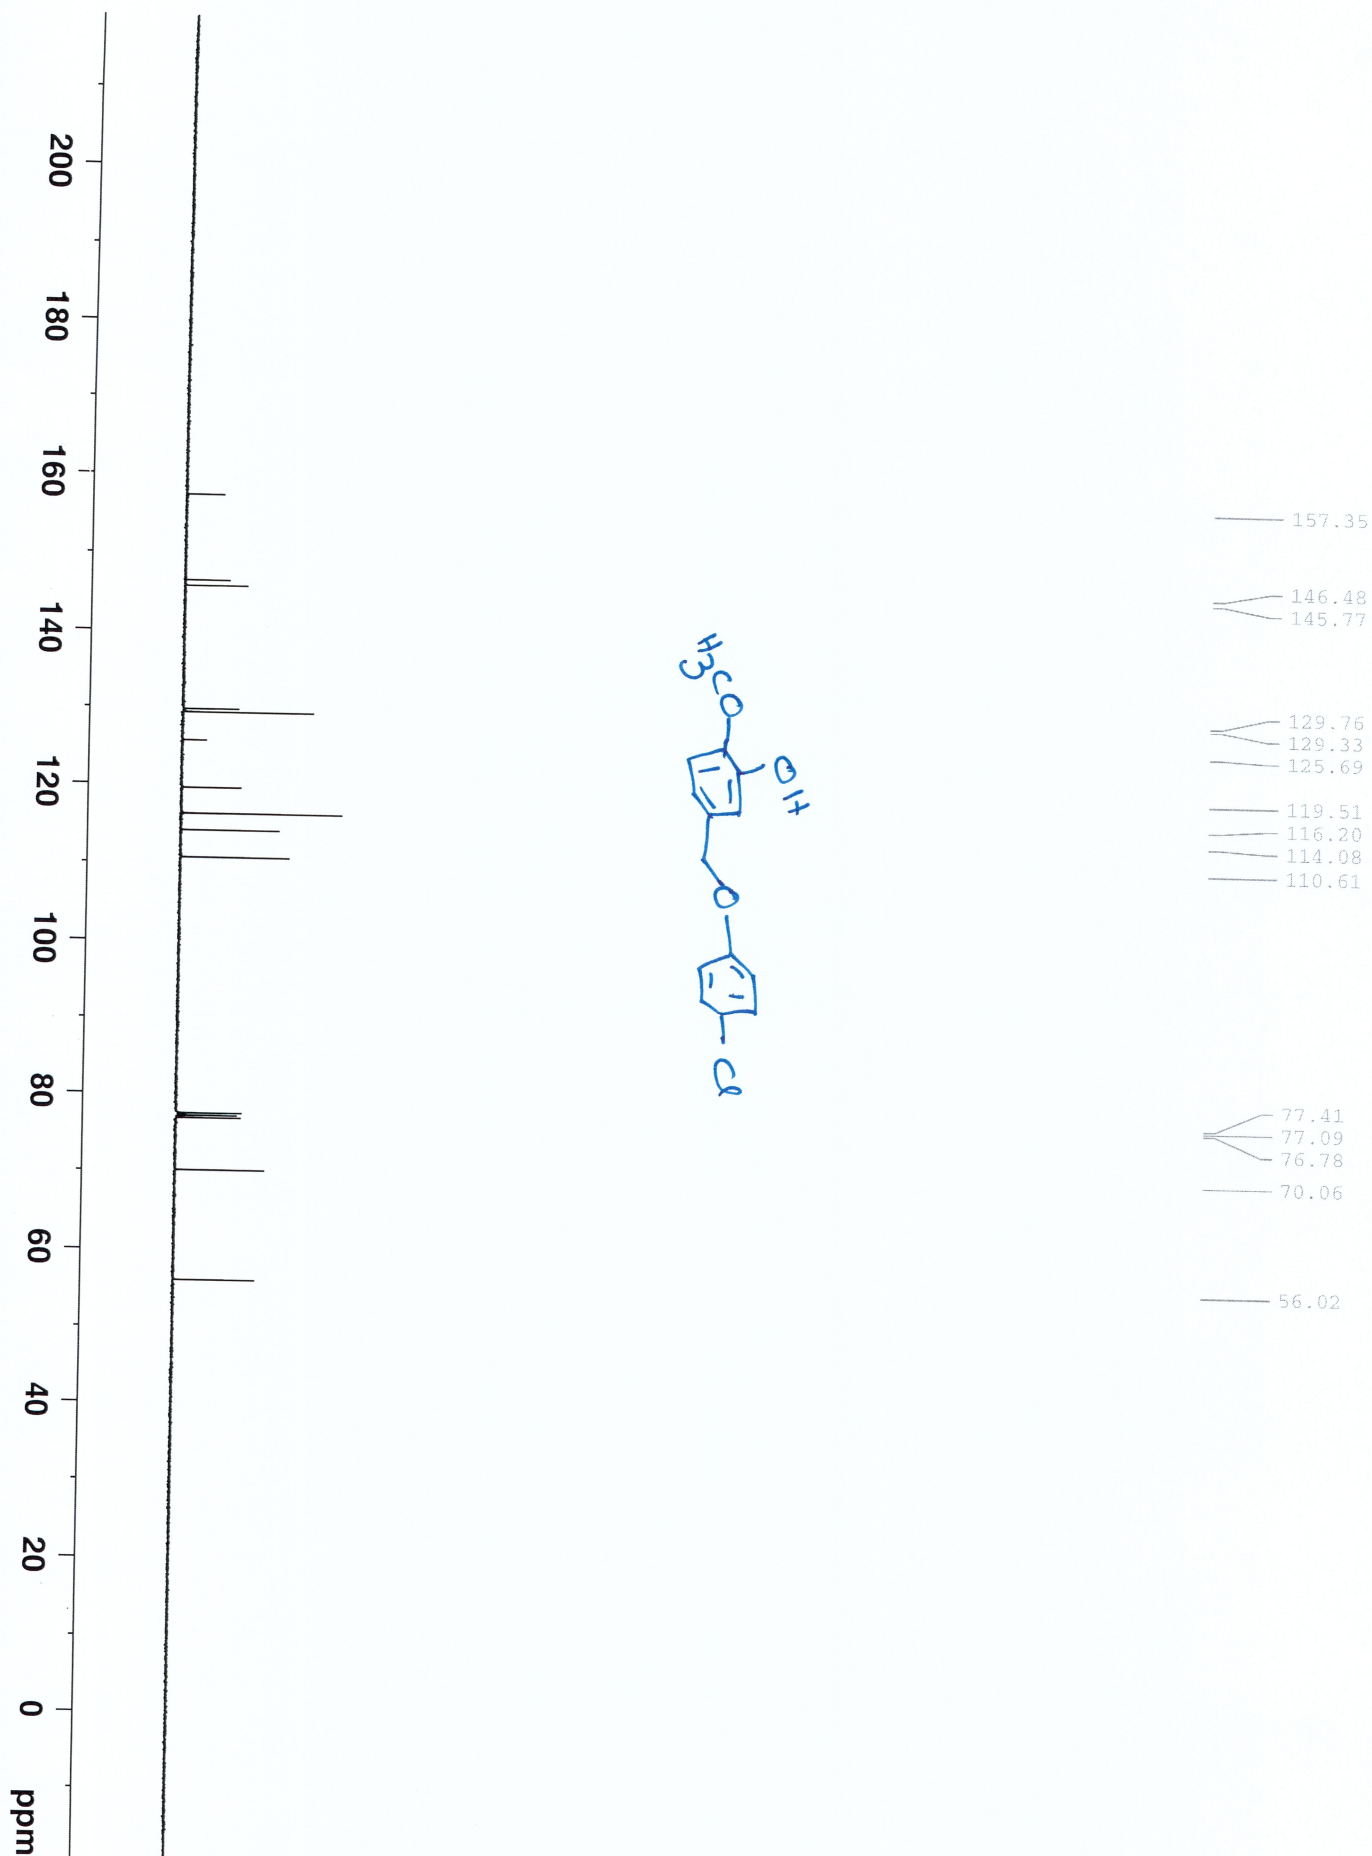



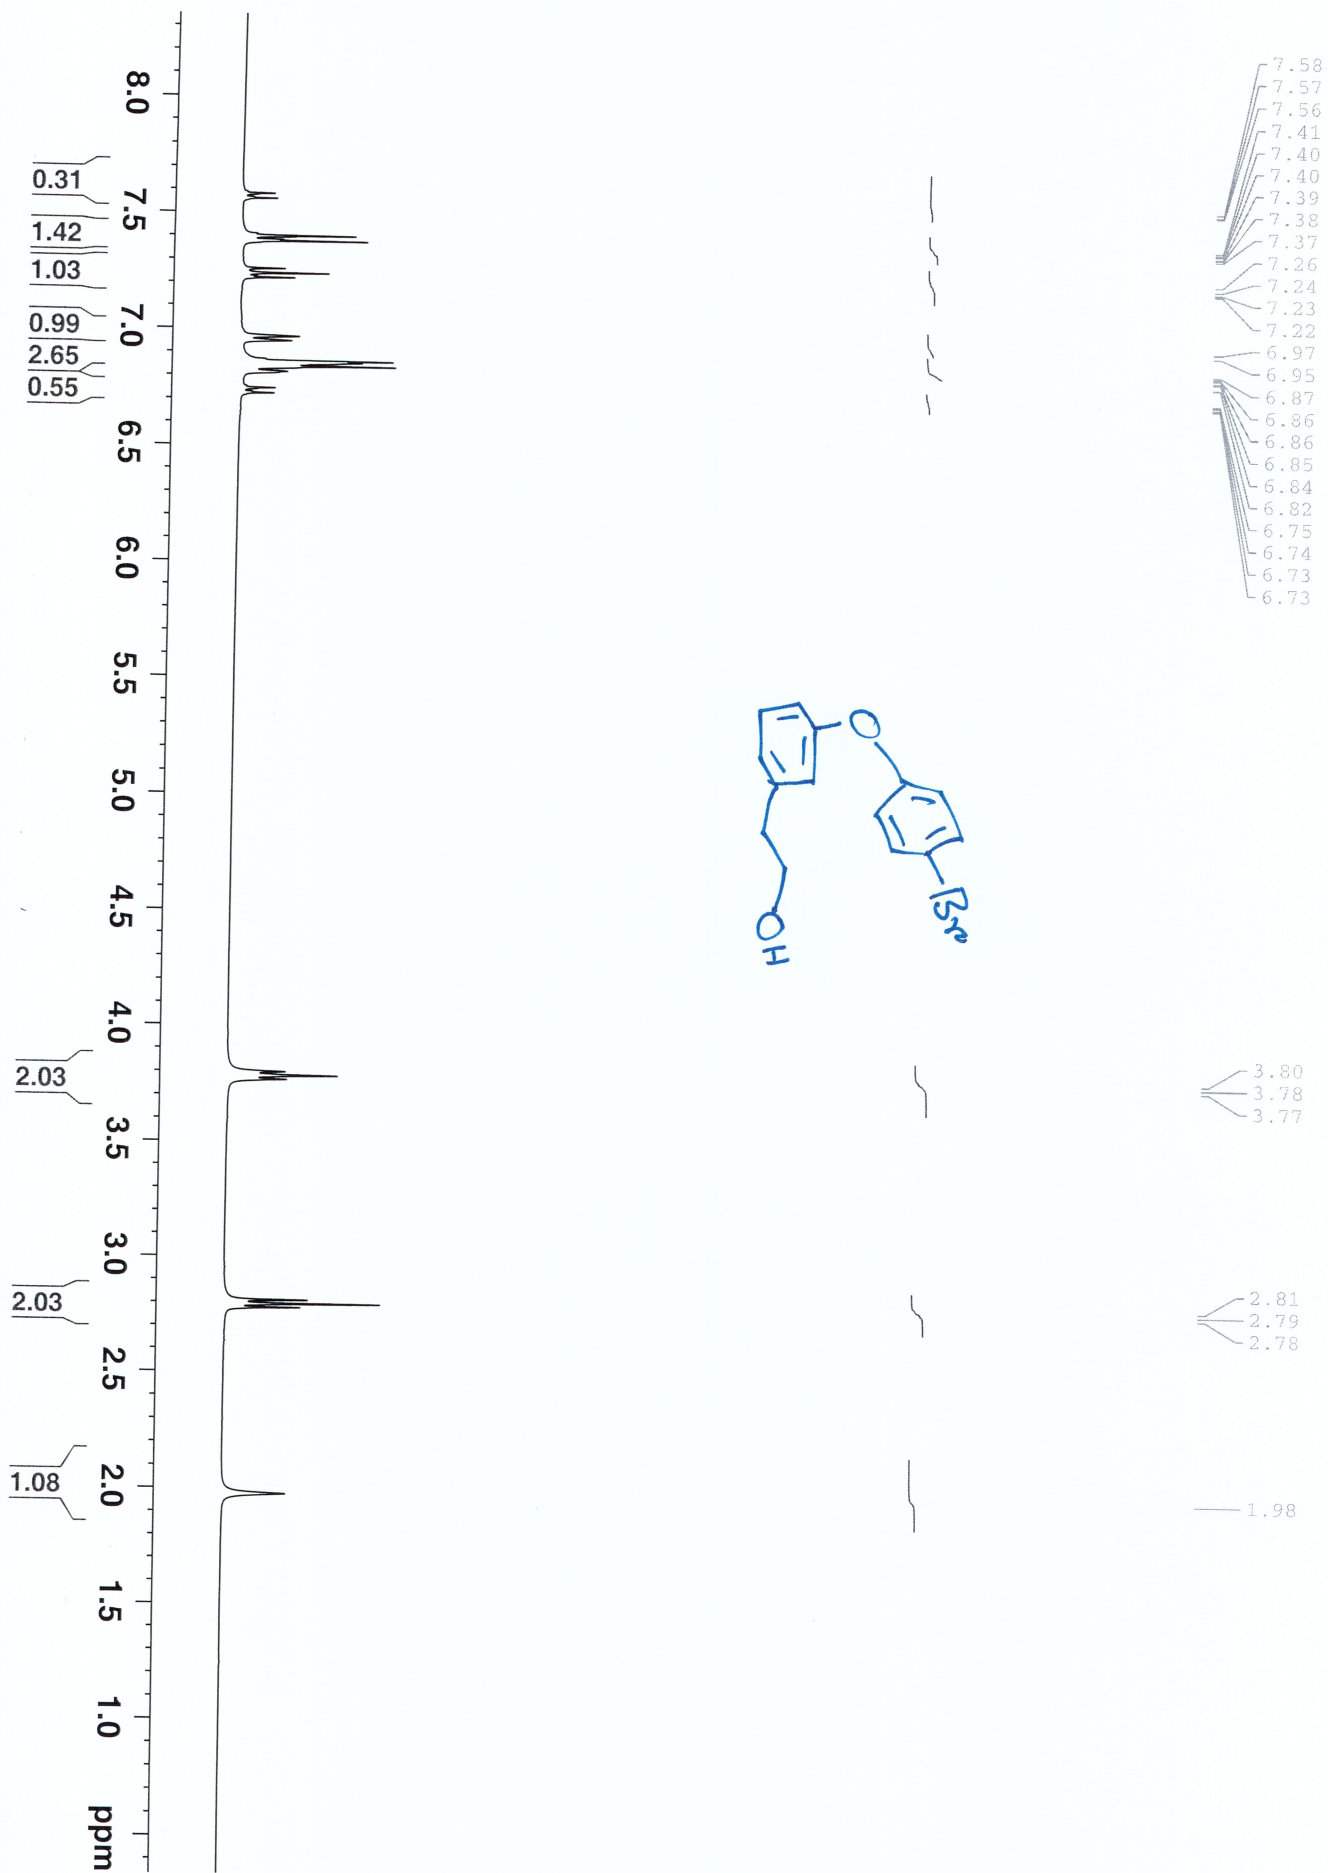

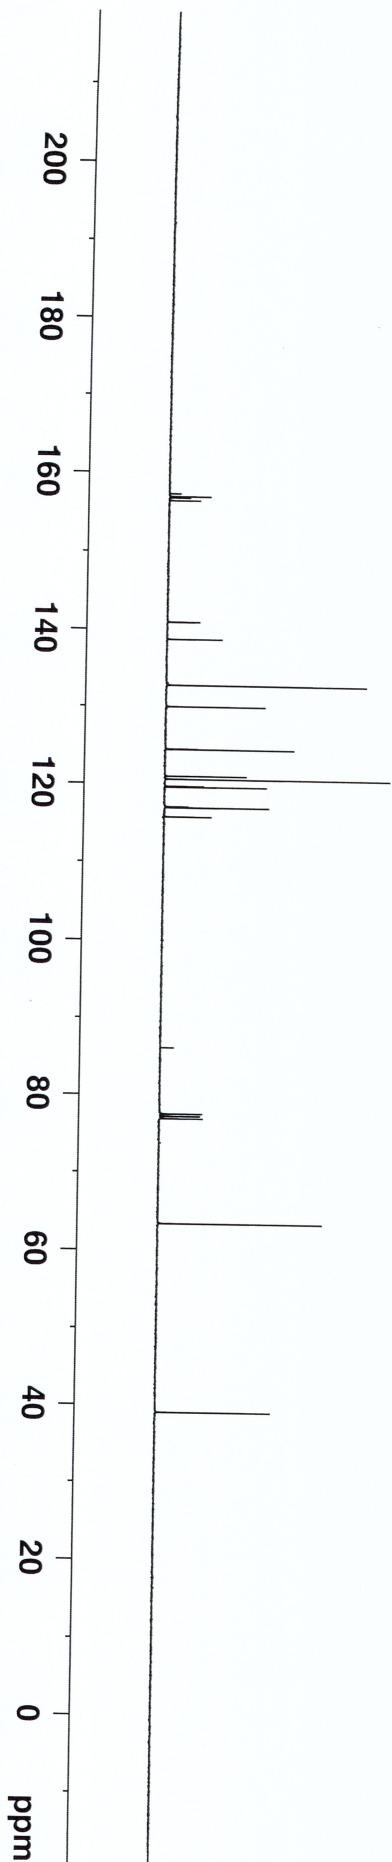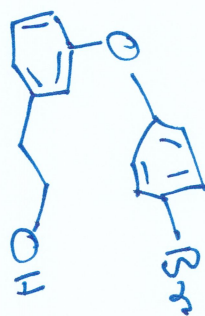

157.31  
156.95  
156.78  
156.42

140.94  
138.70  
132.74  
129.96  
124.48  
124.41  
120.96  
120.56  
119.66  
119.56  
117.02  
116.91  
115.73

86.08

77.49  
77.17  
76.86

63.39

39.01

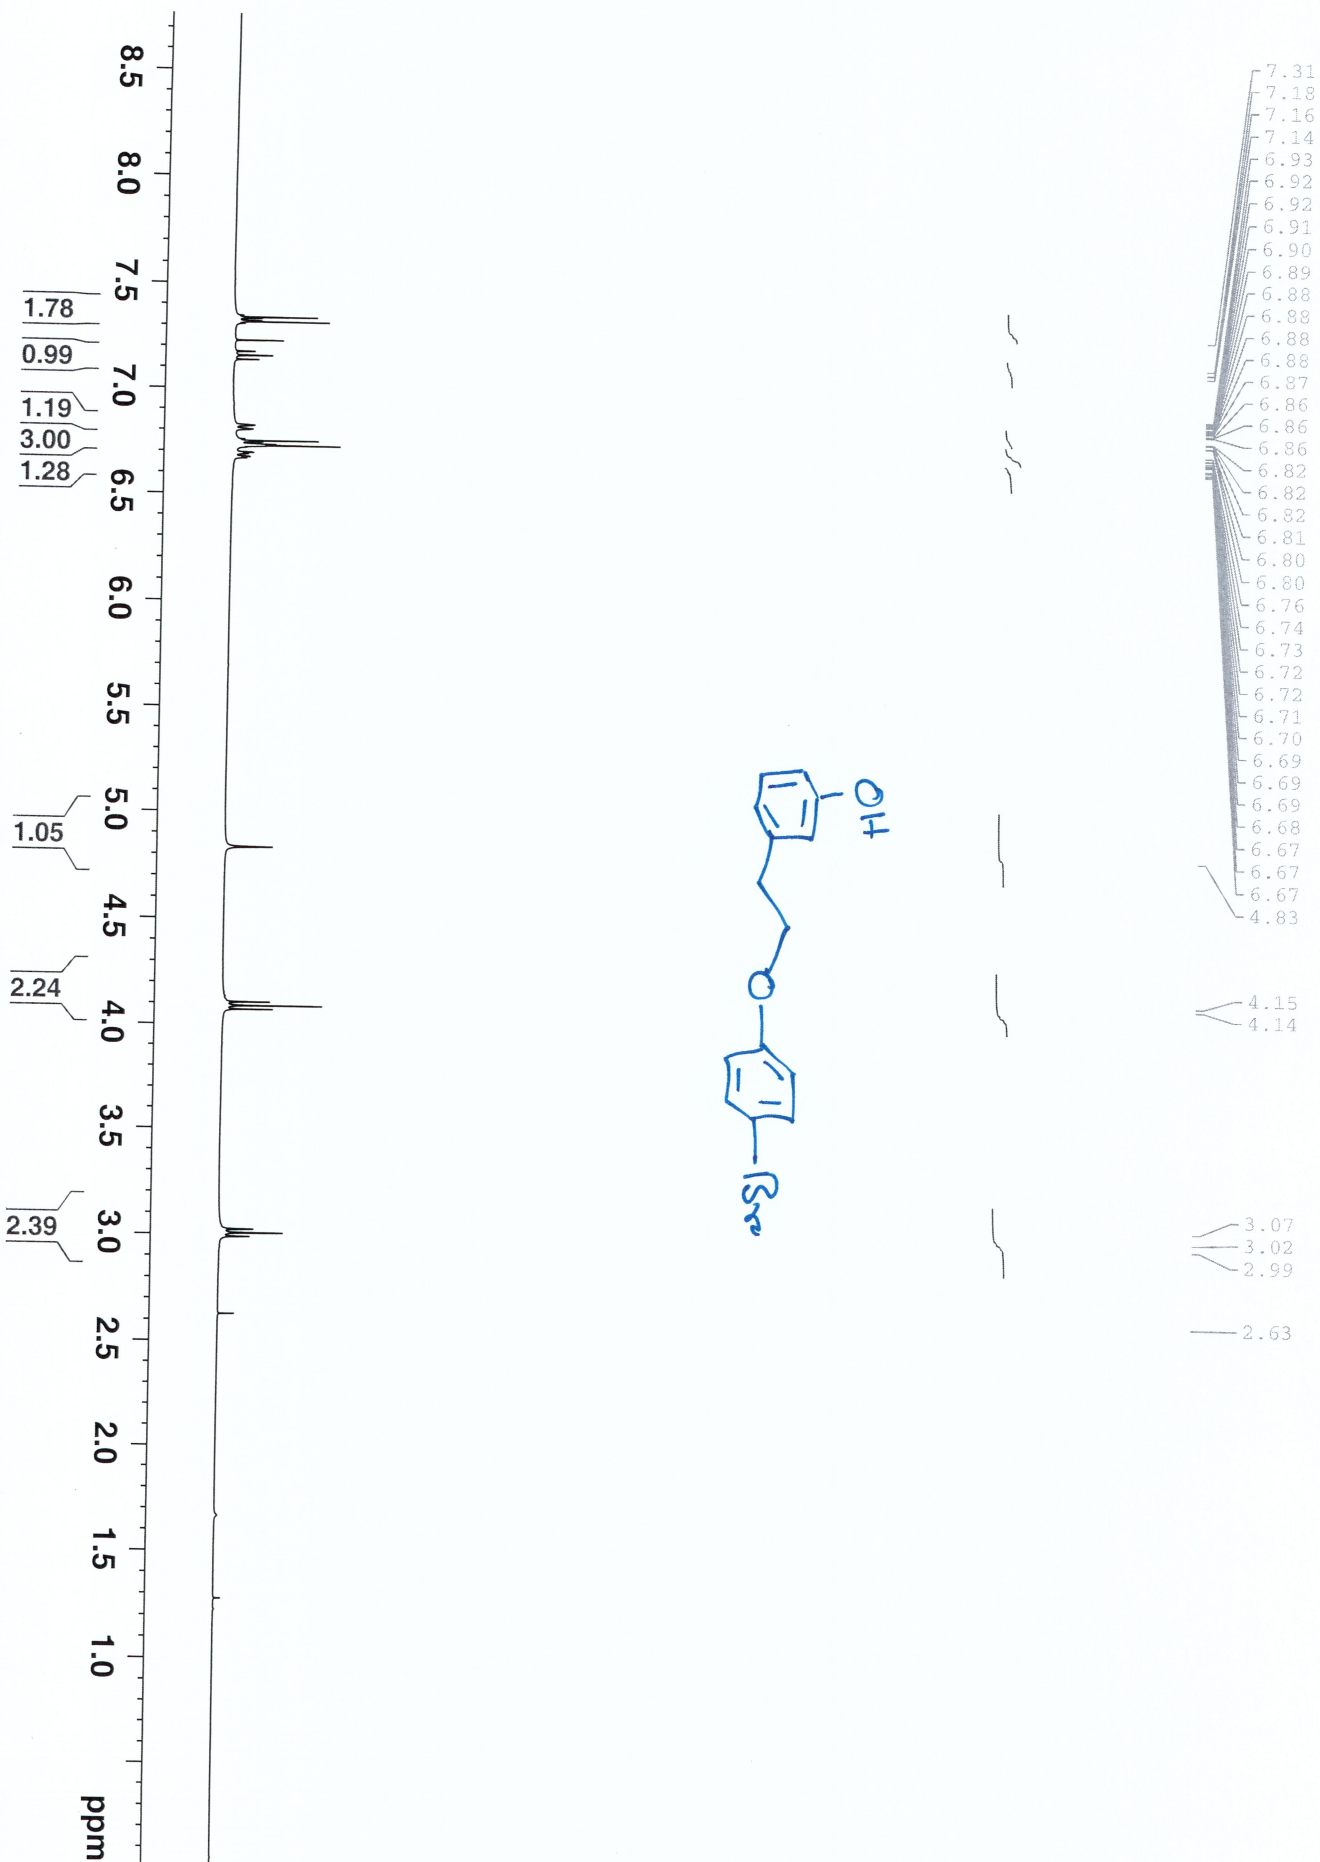



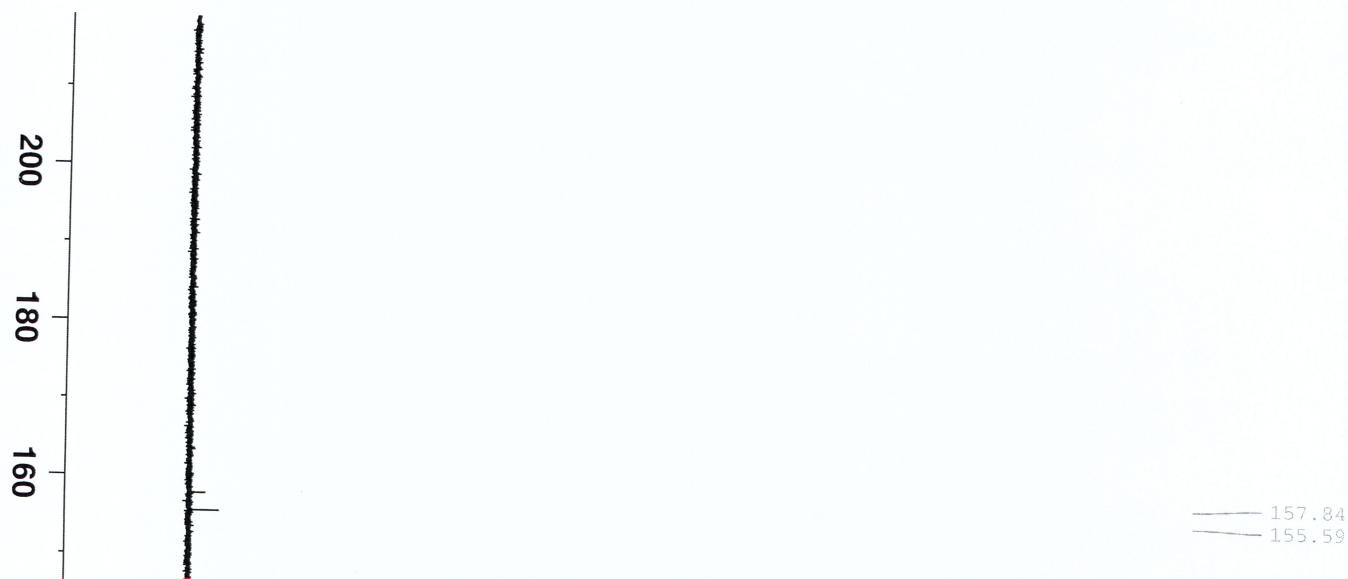

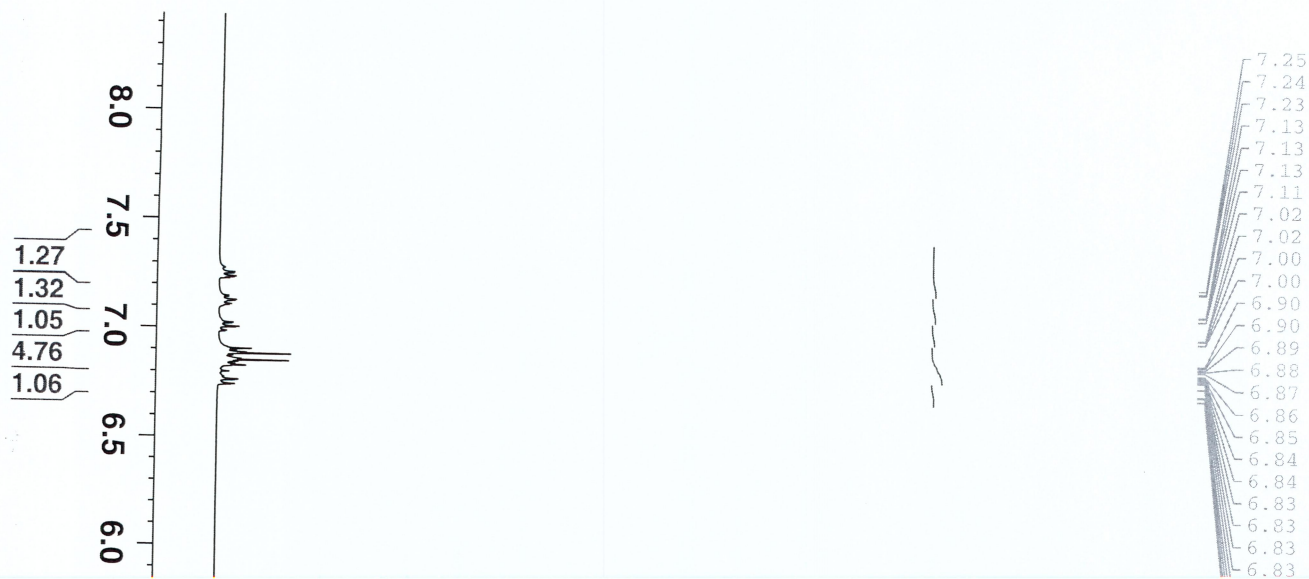

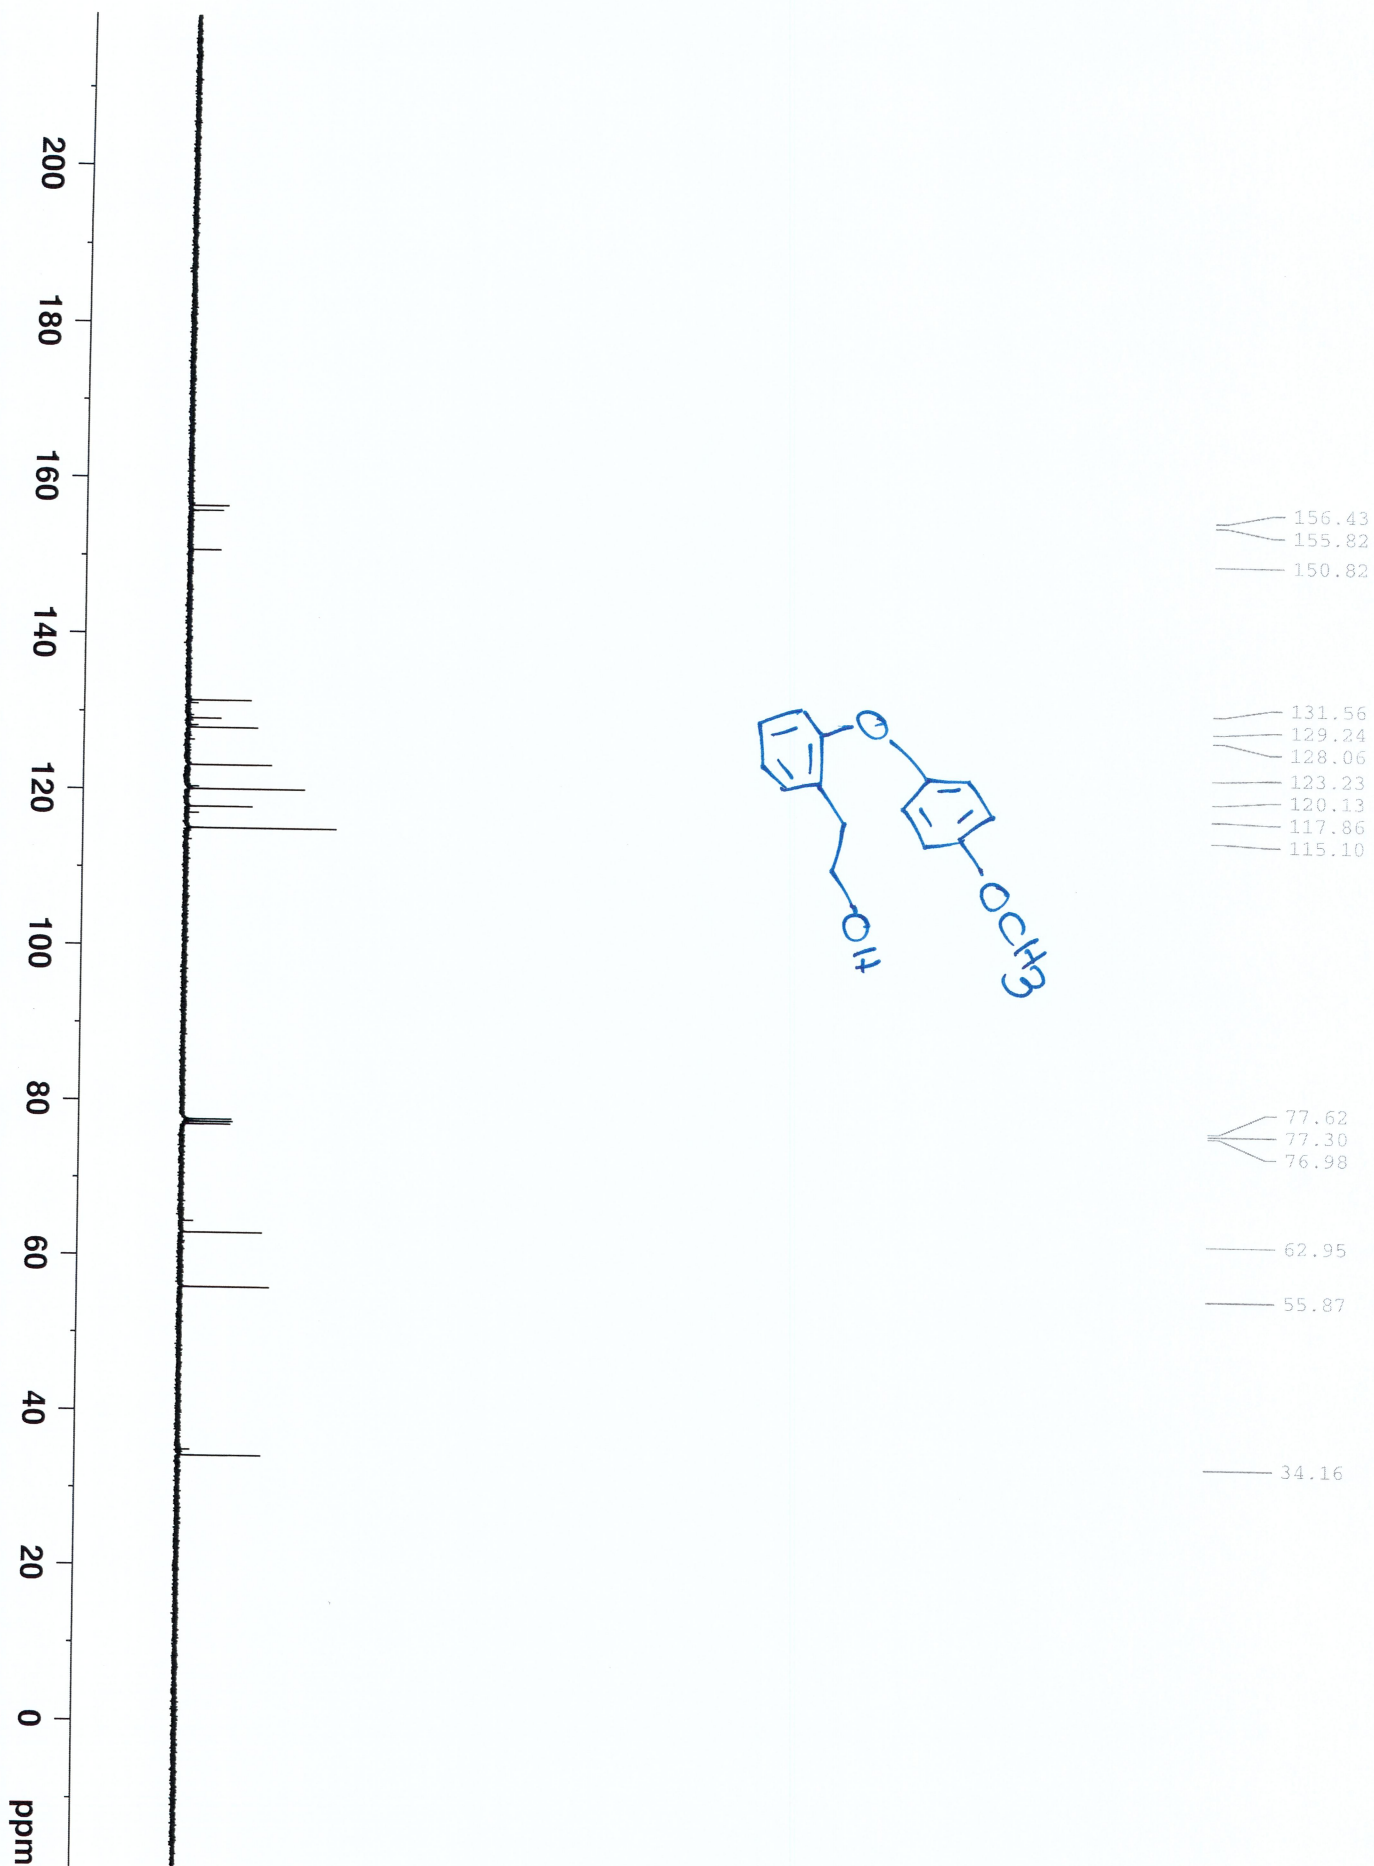



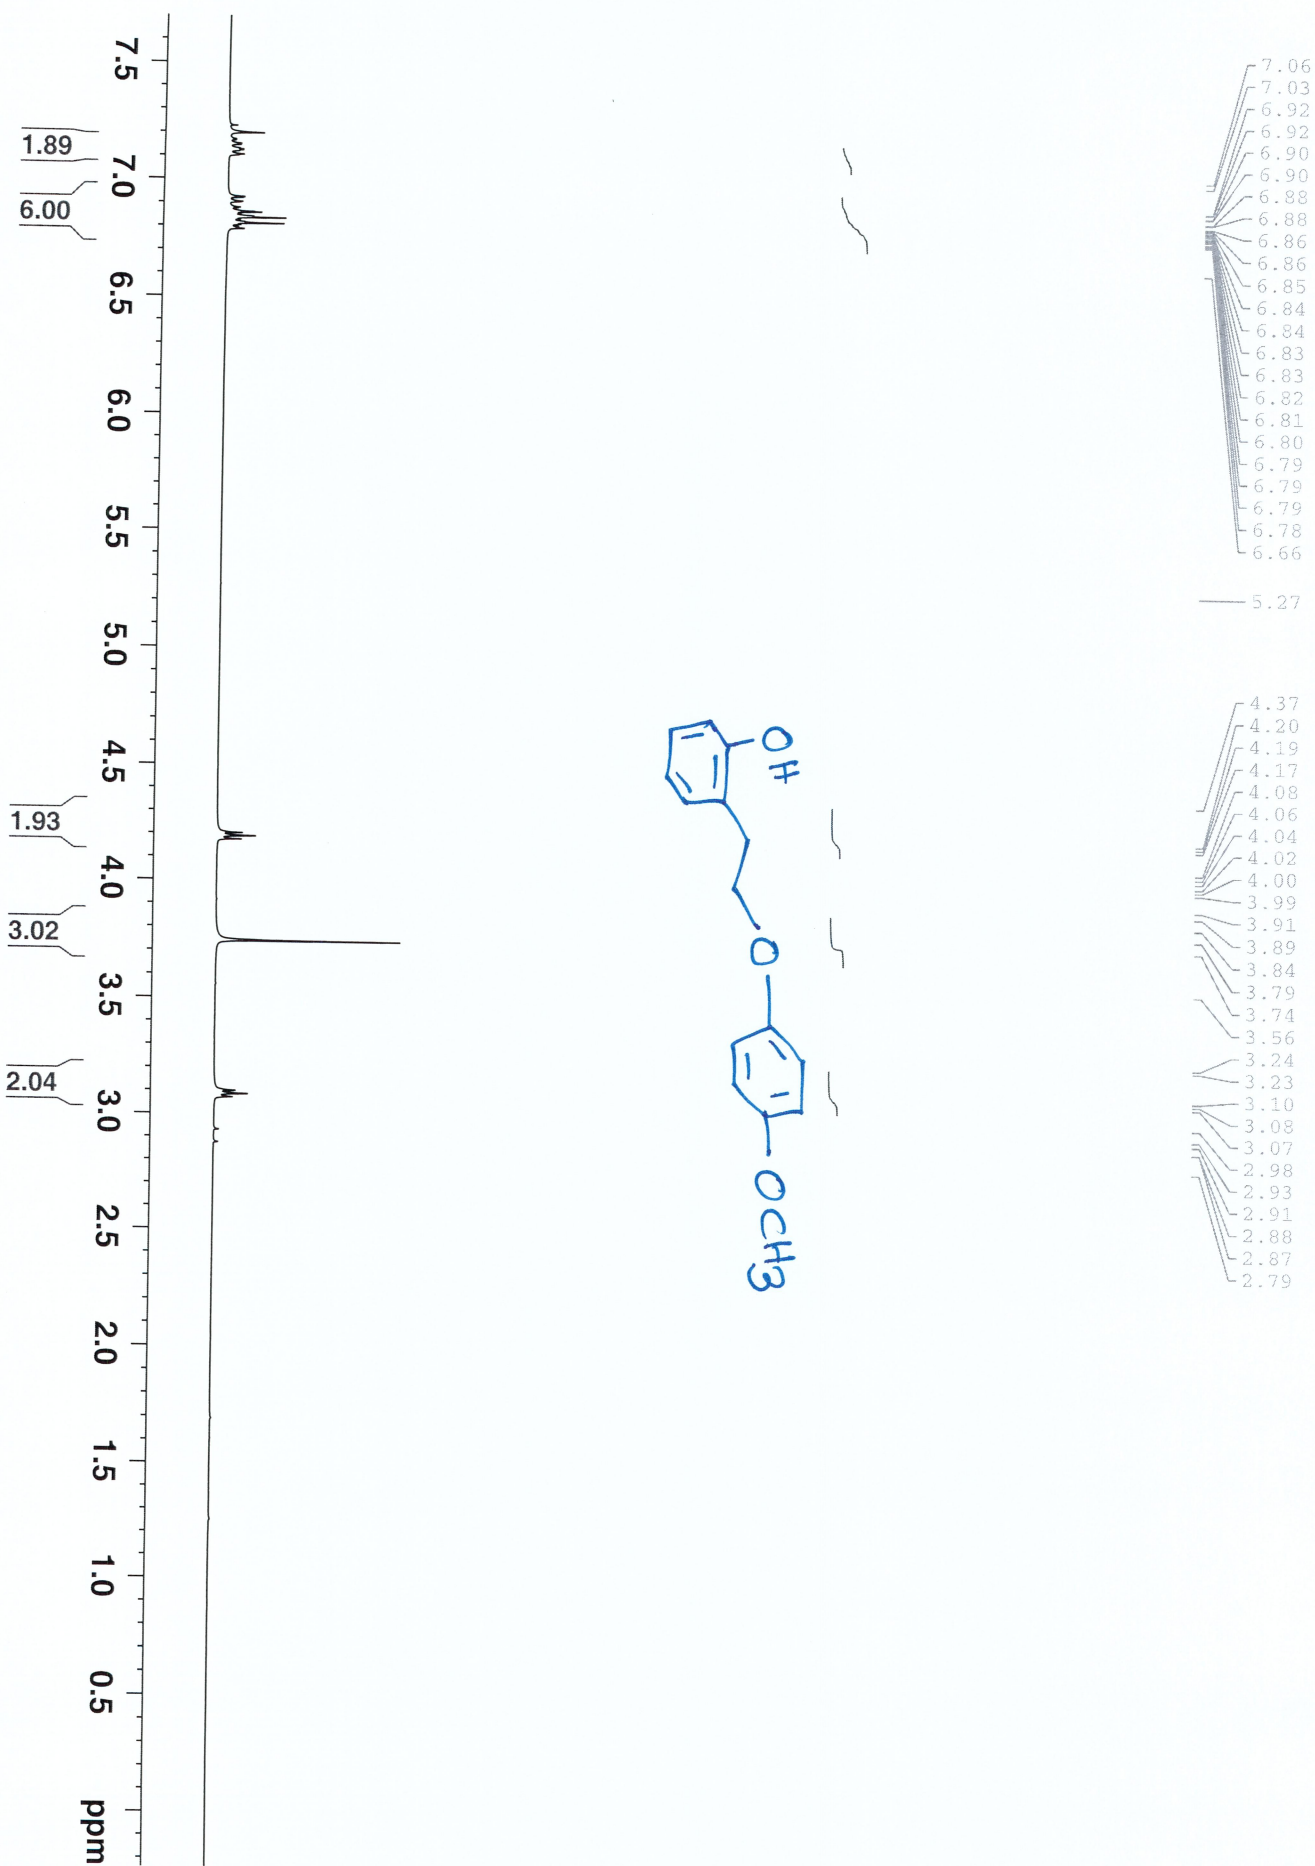

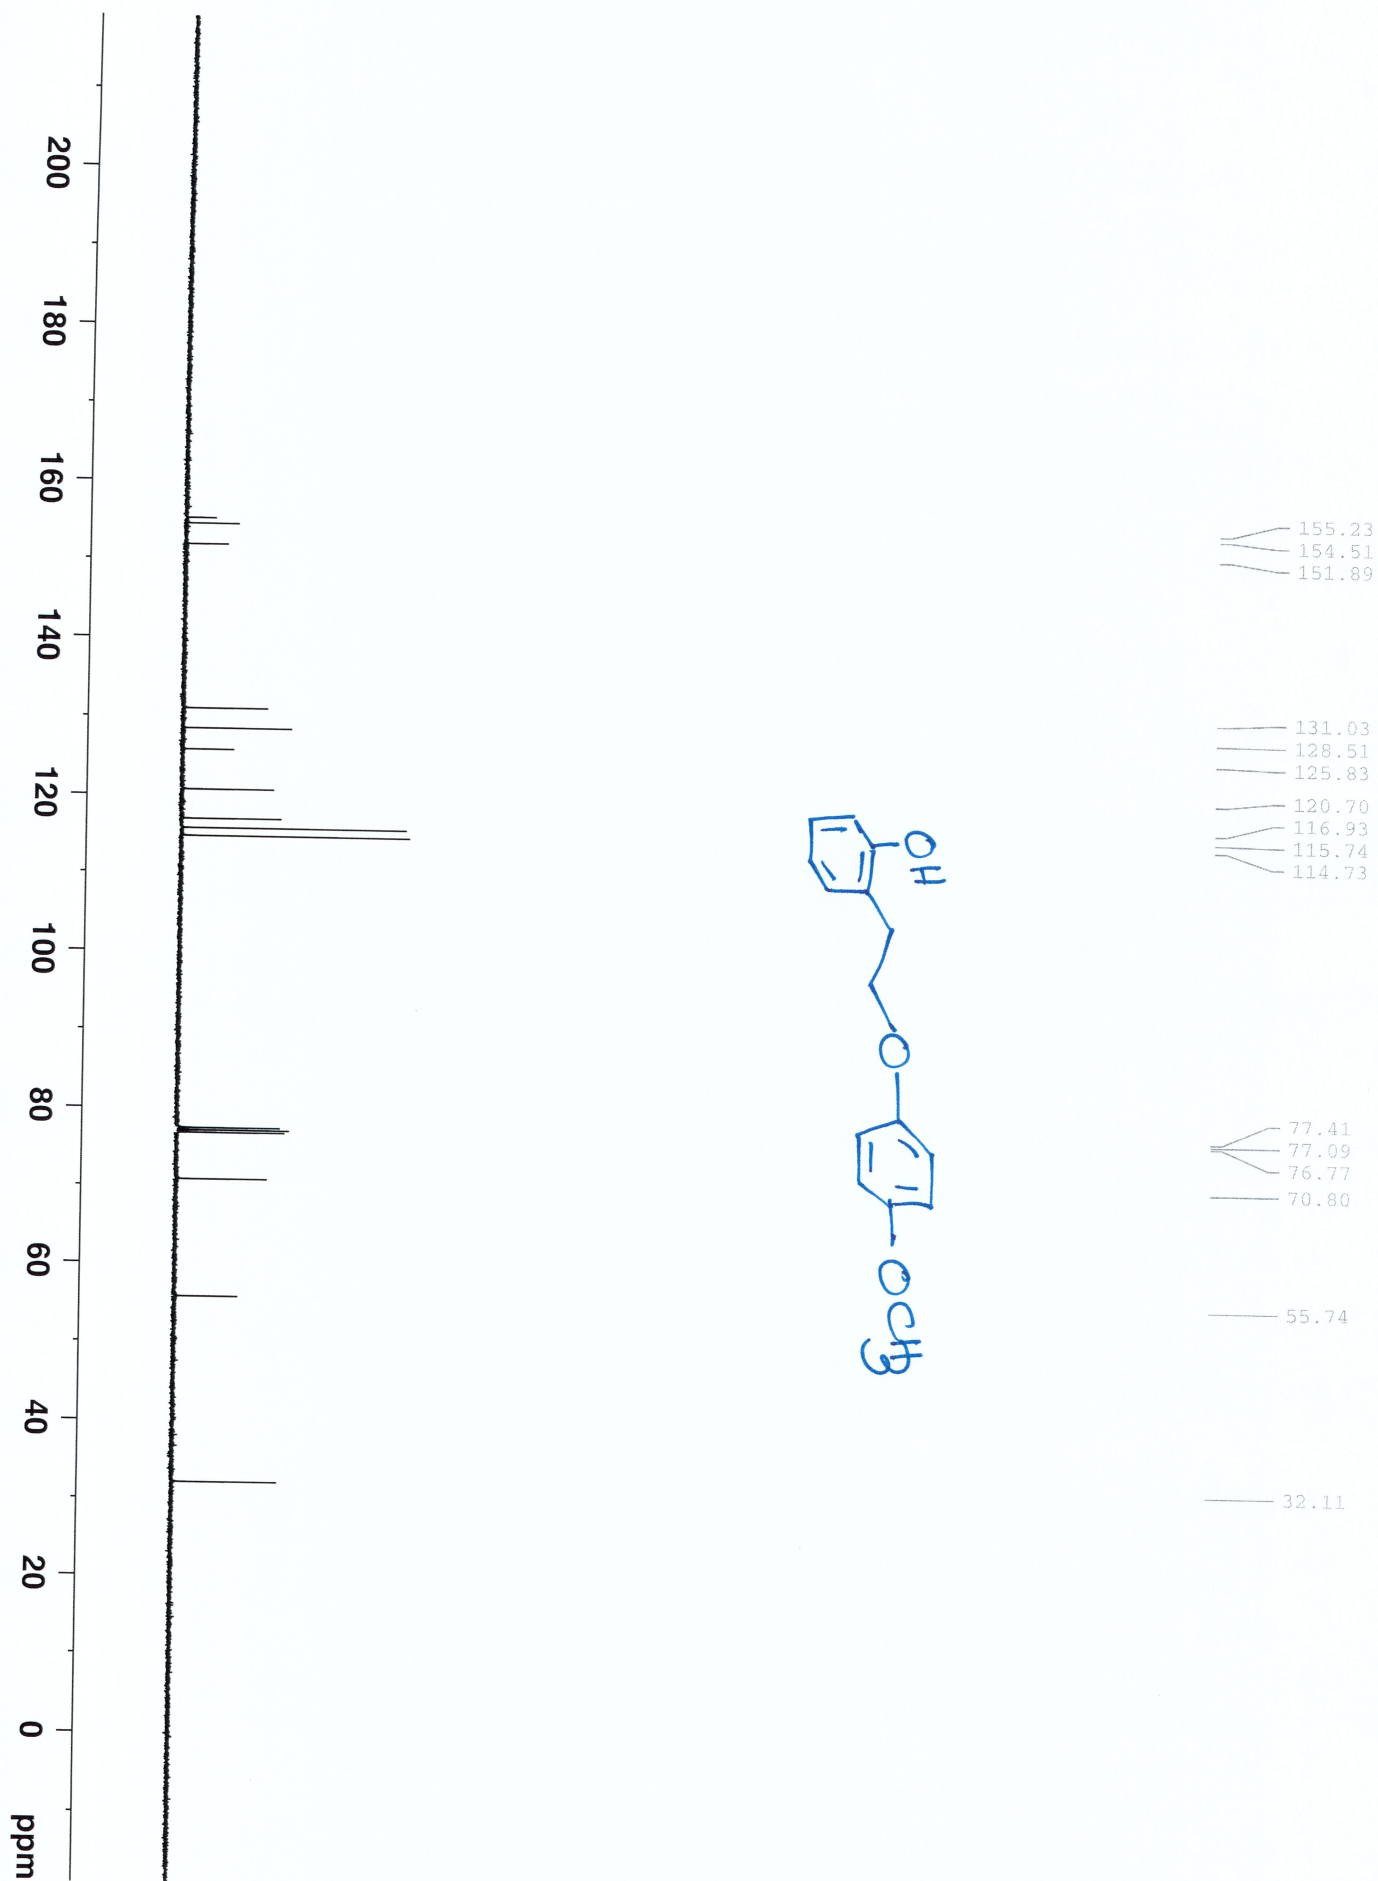

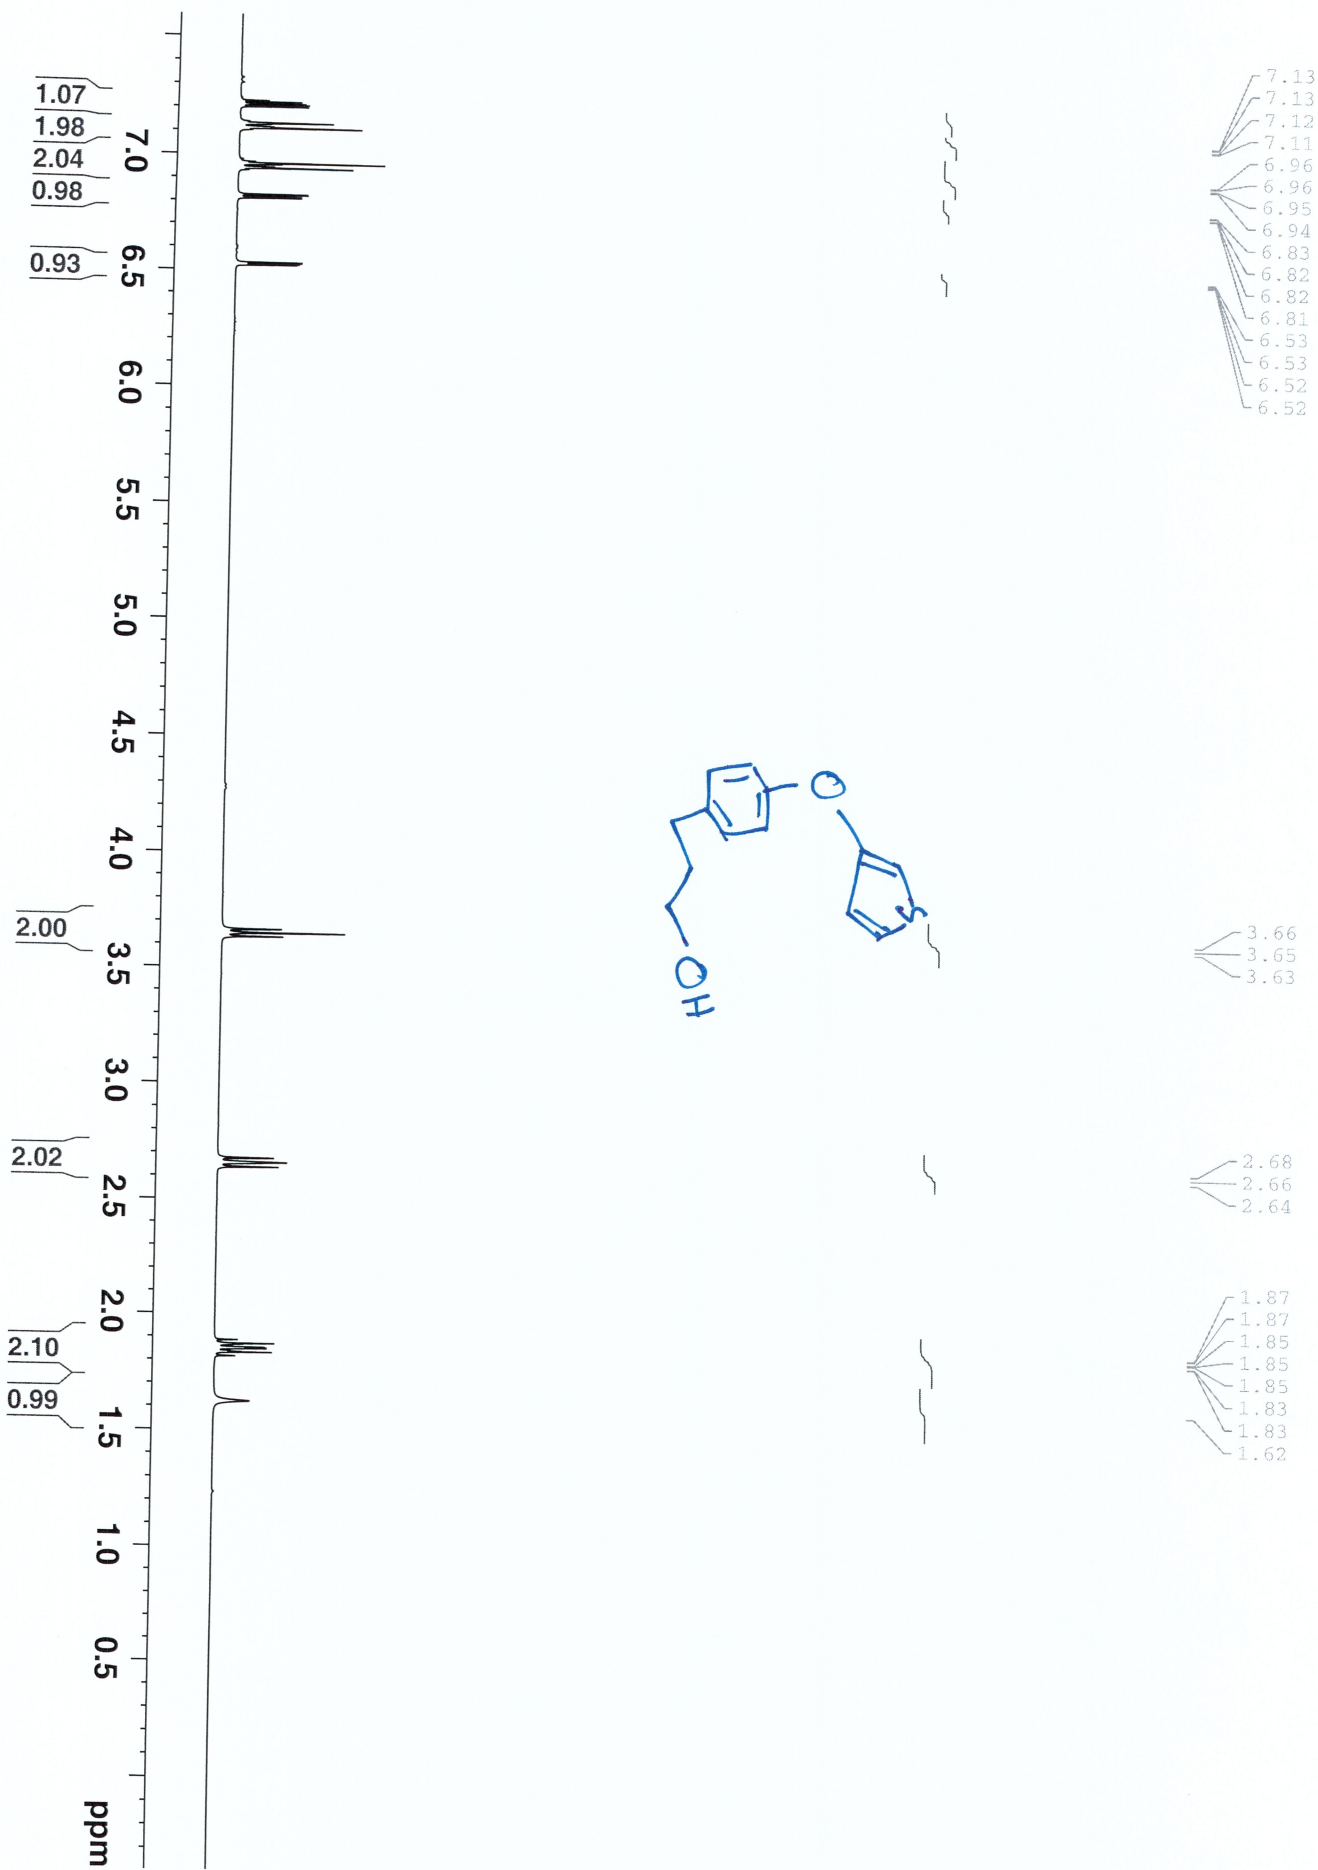



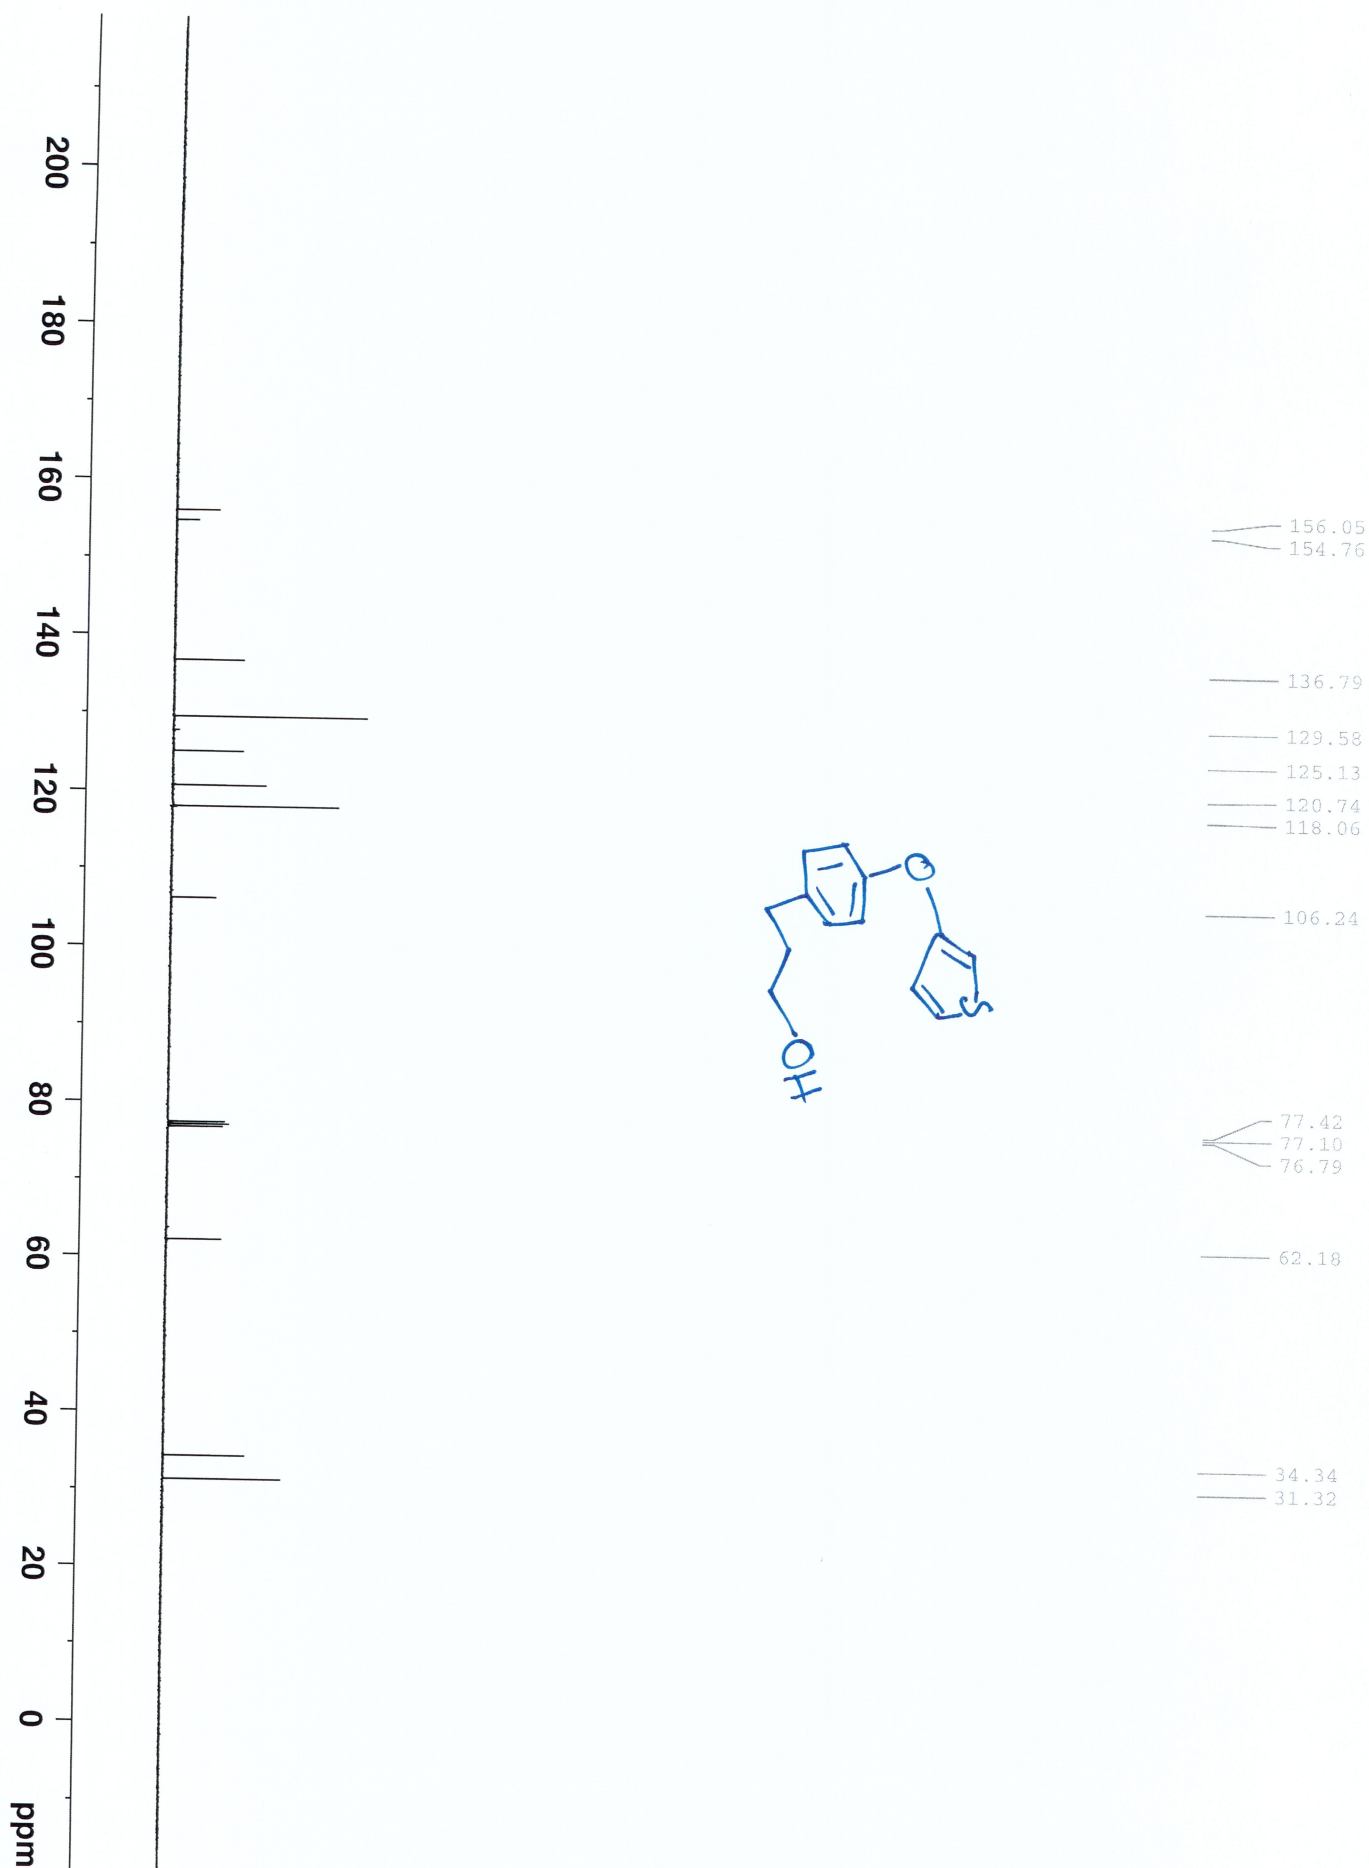

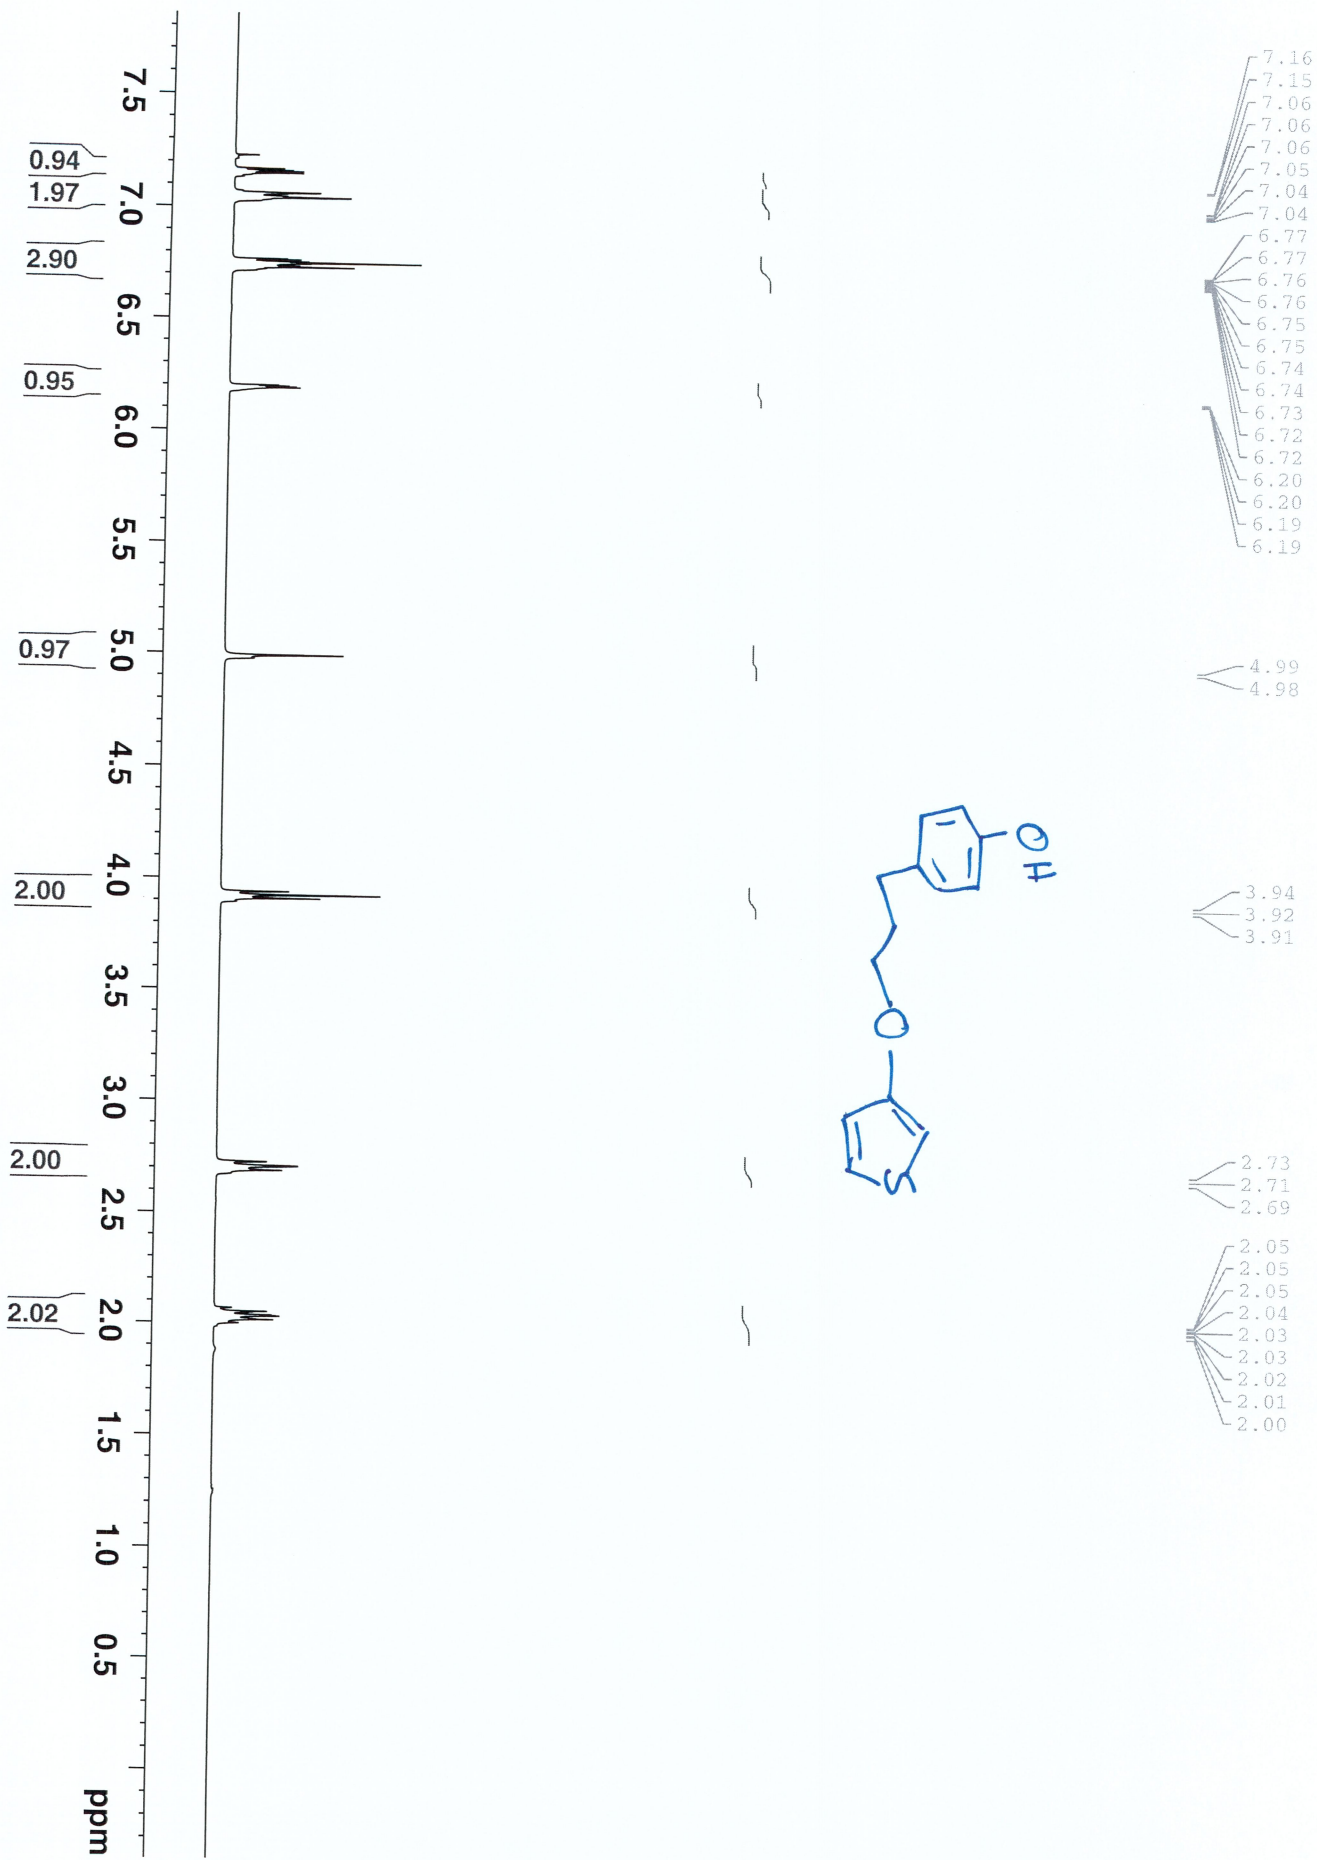

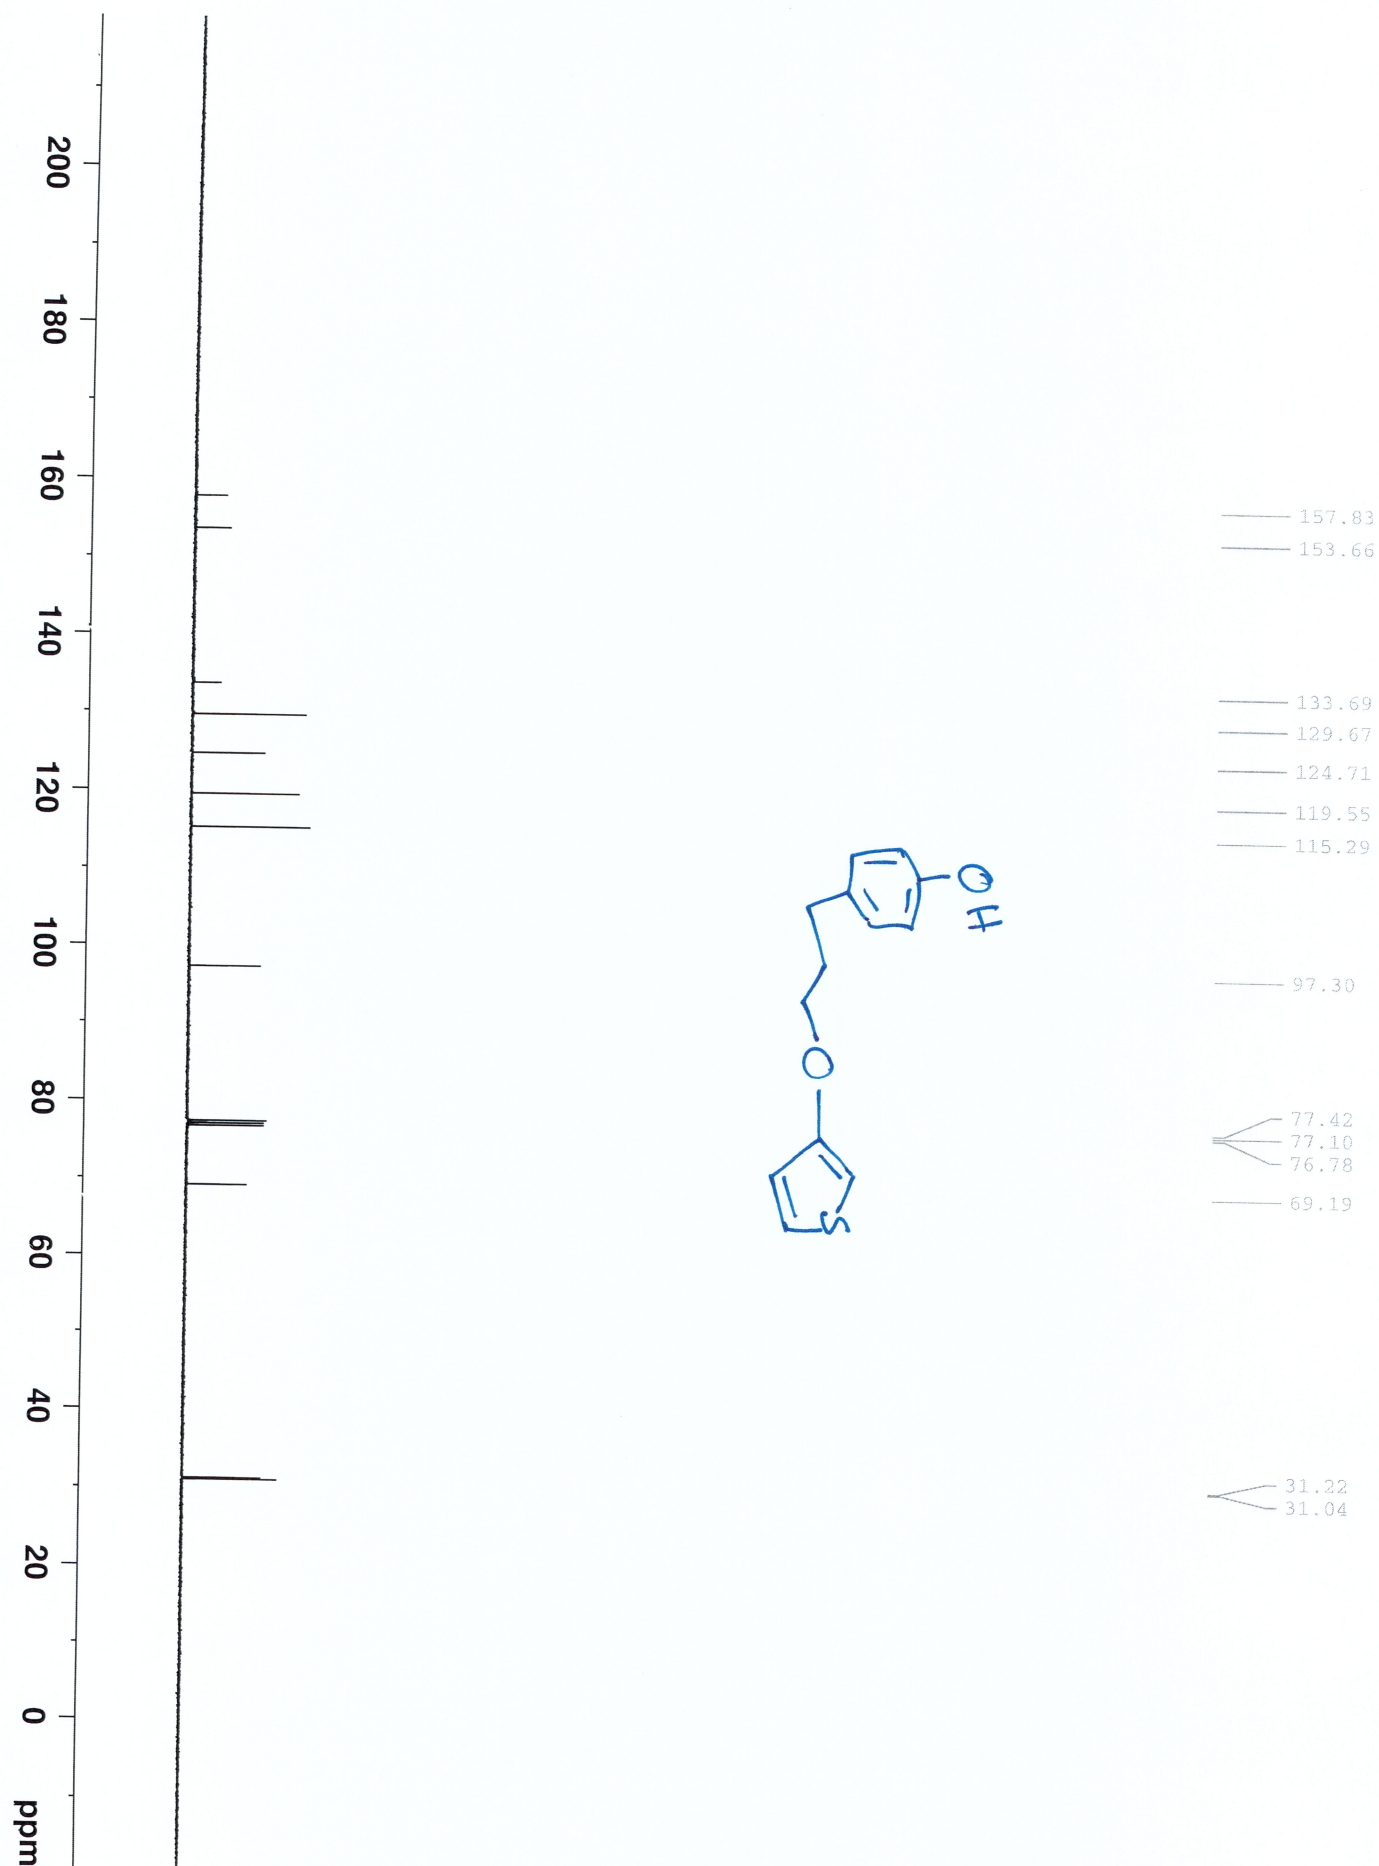



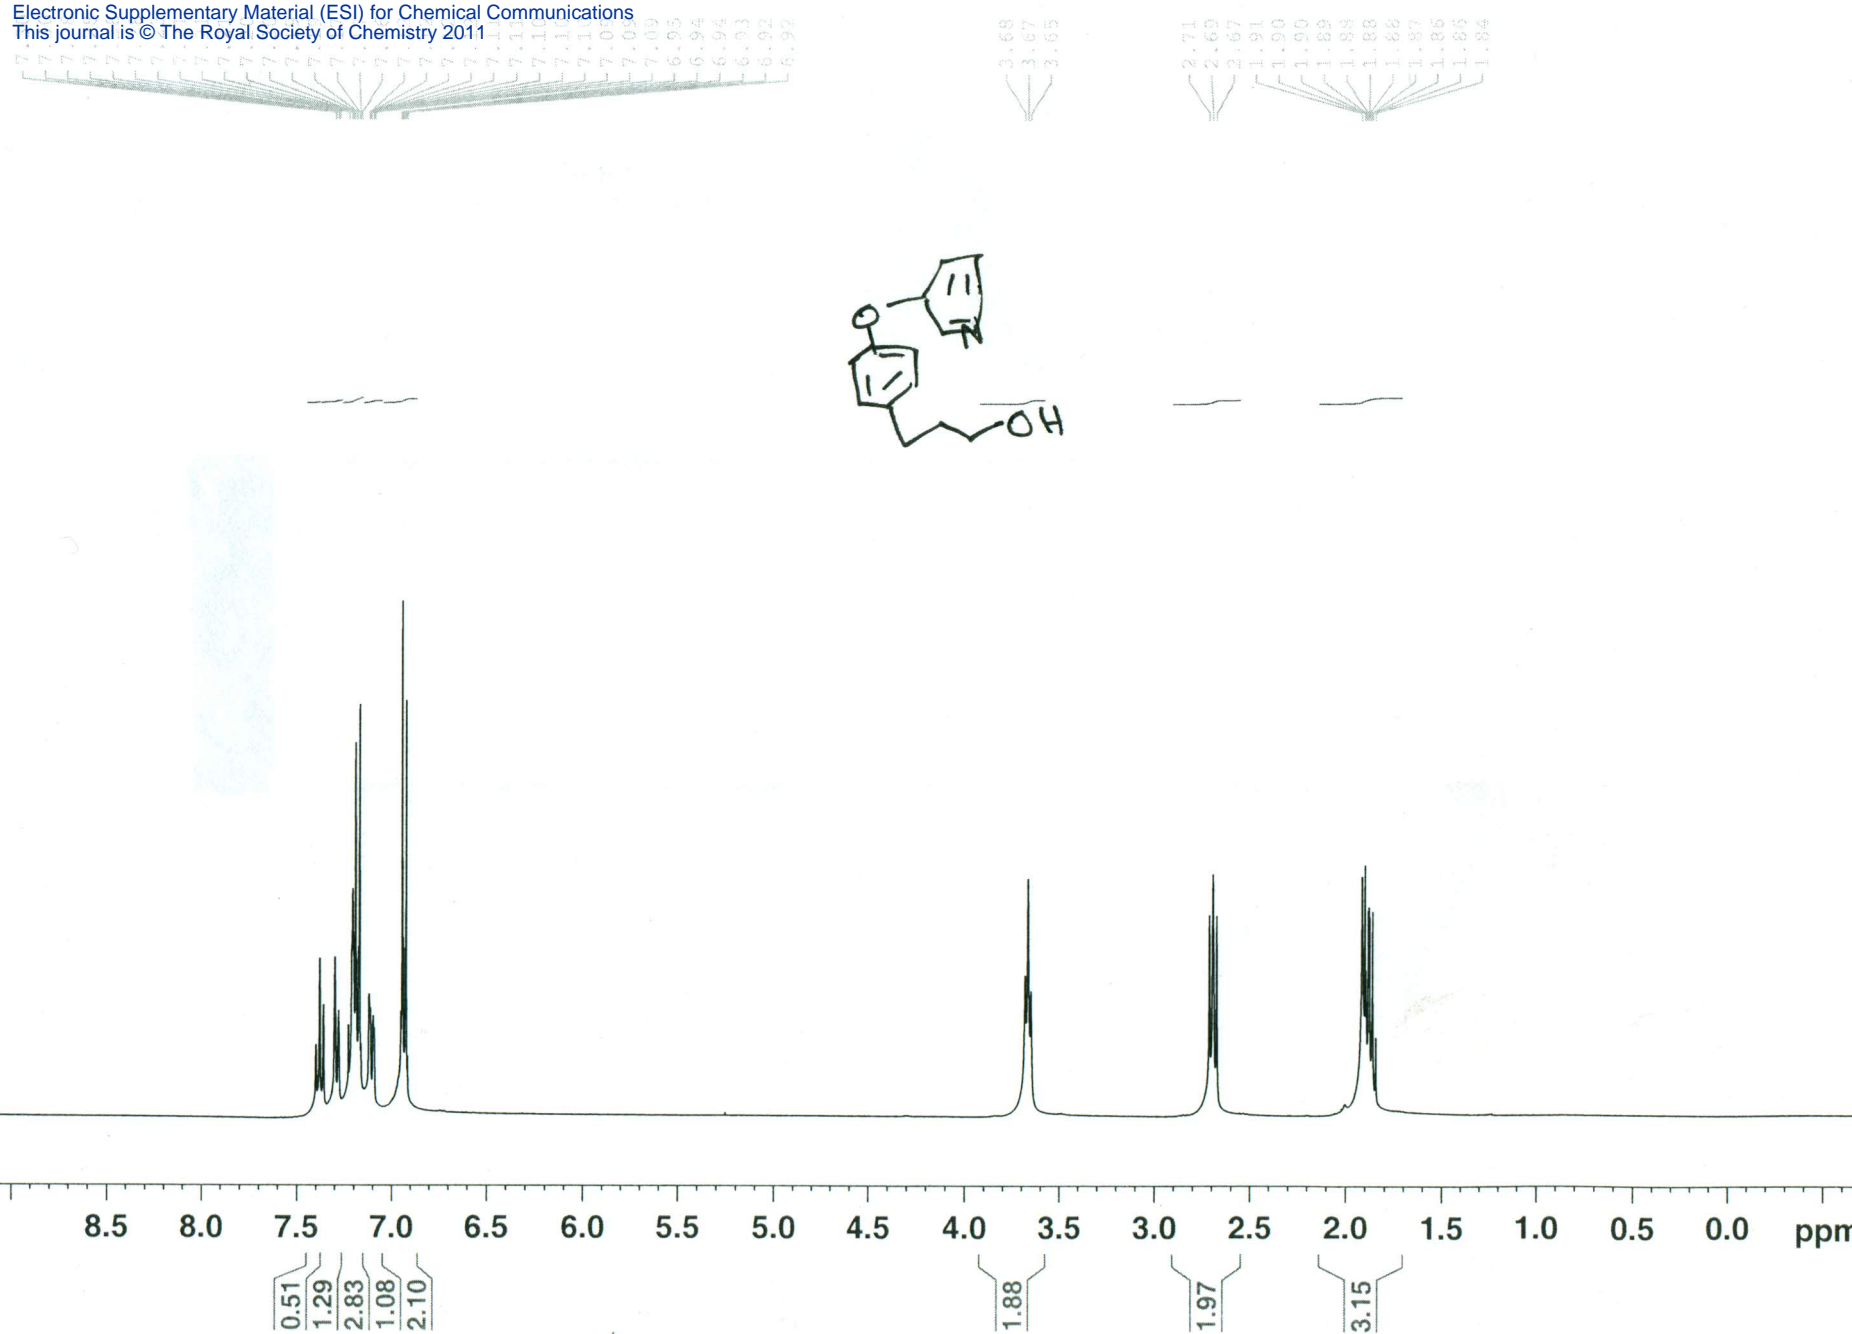

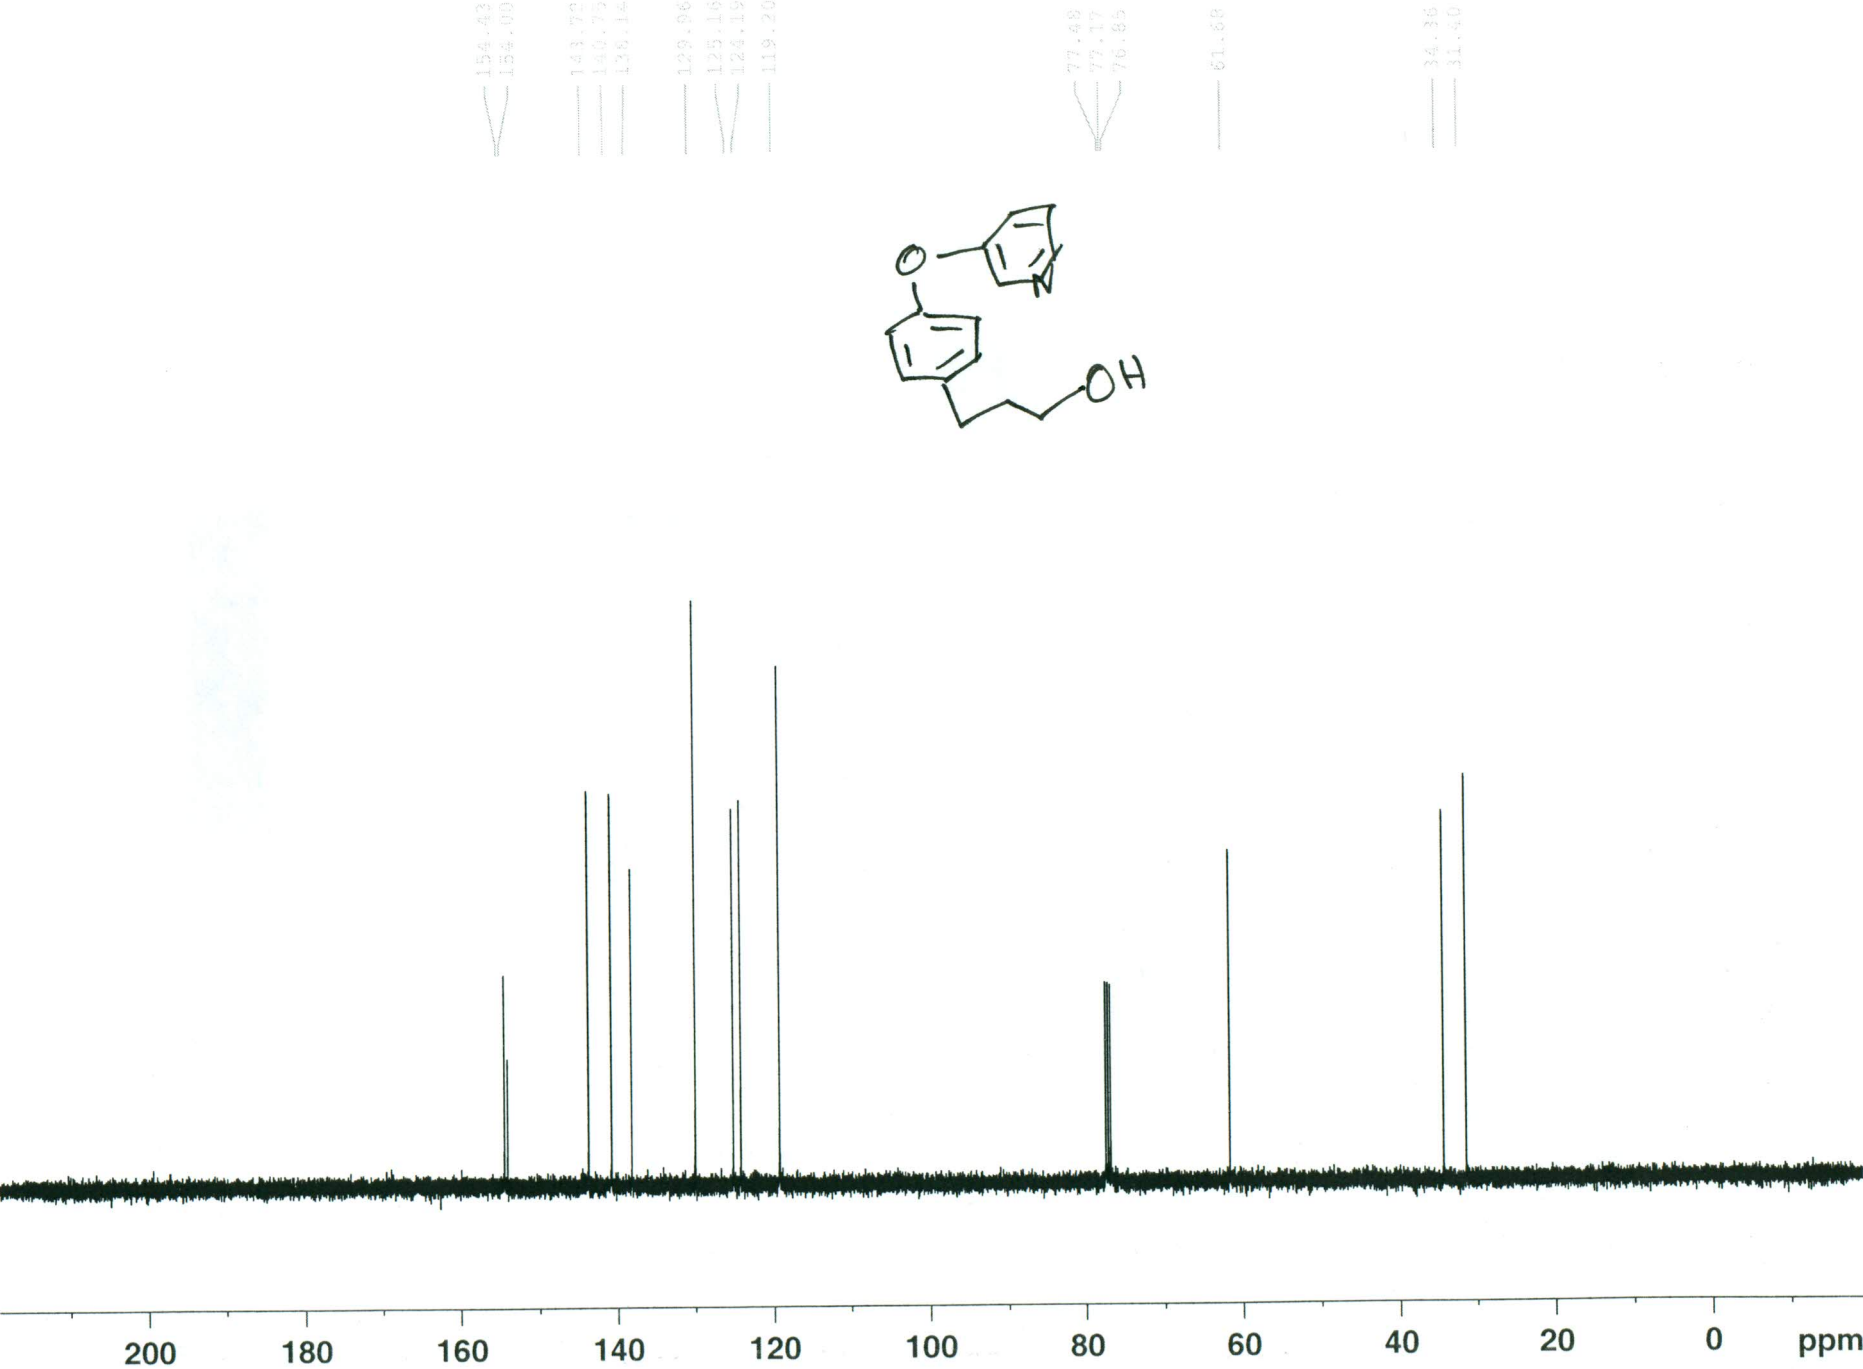

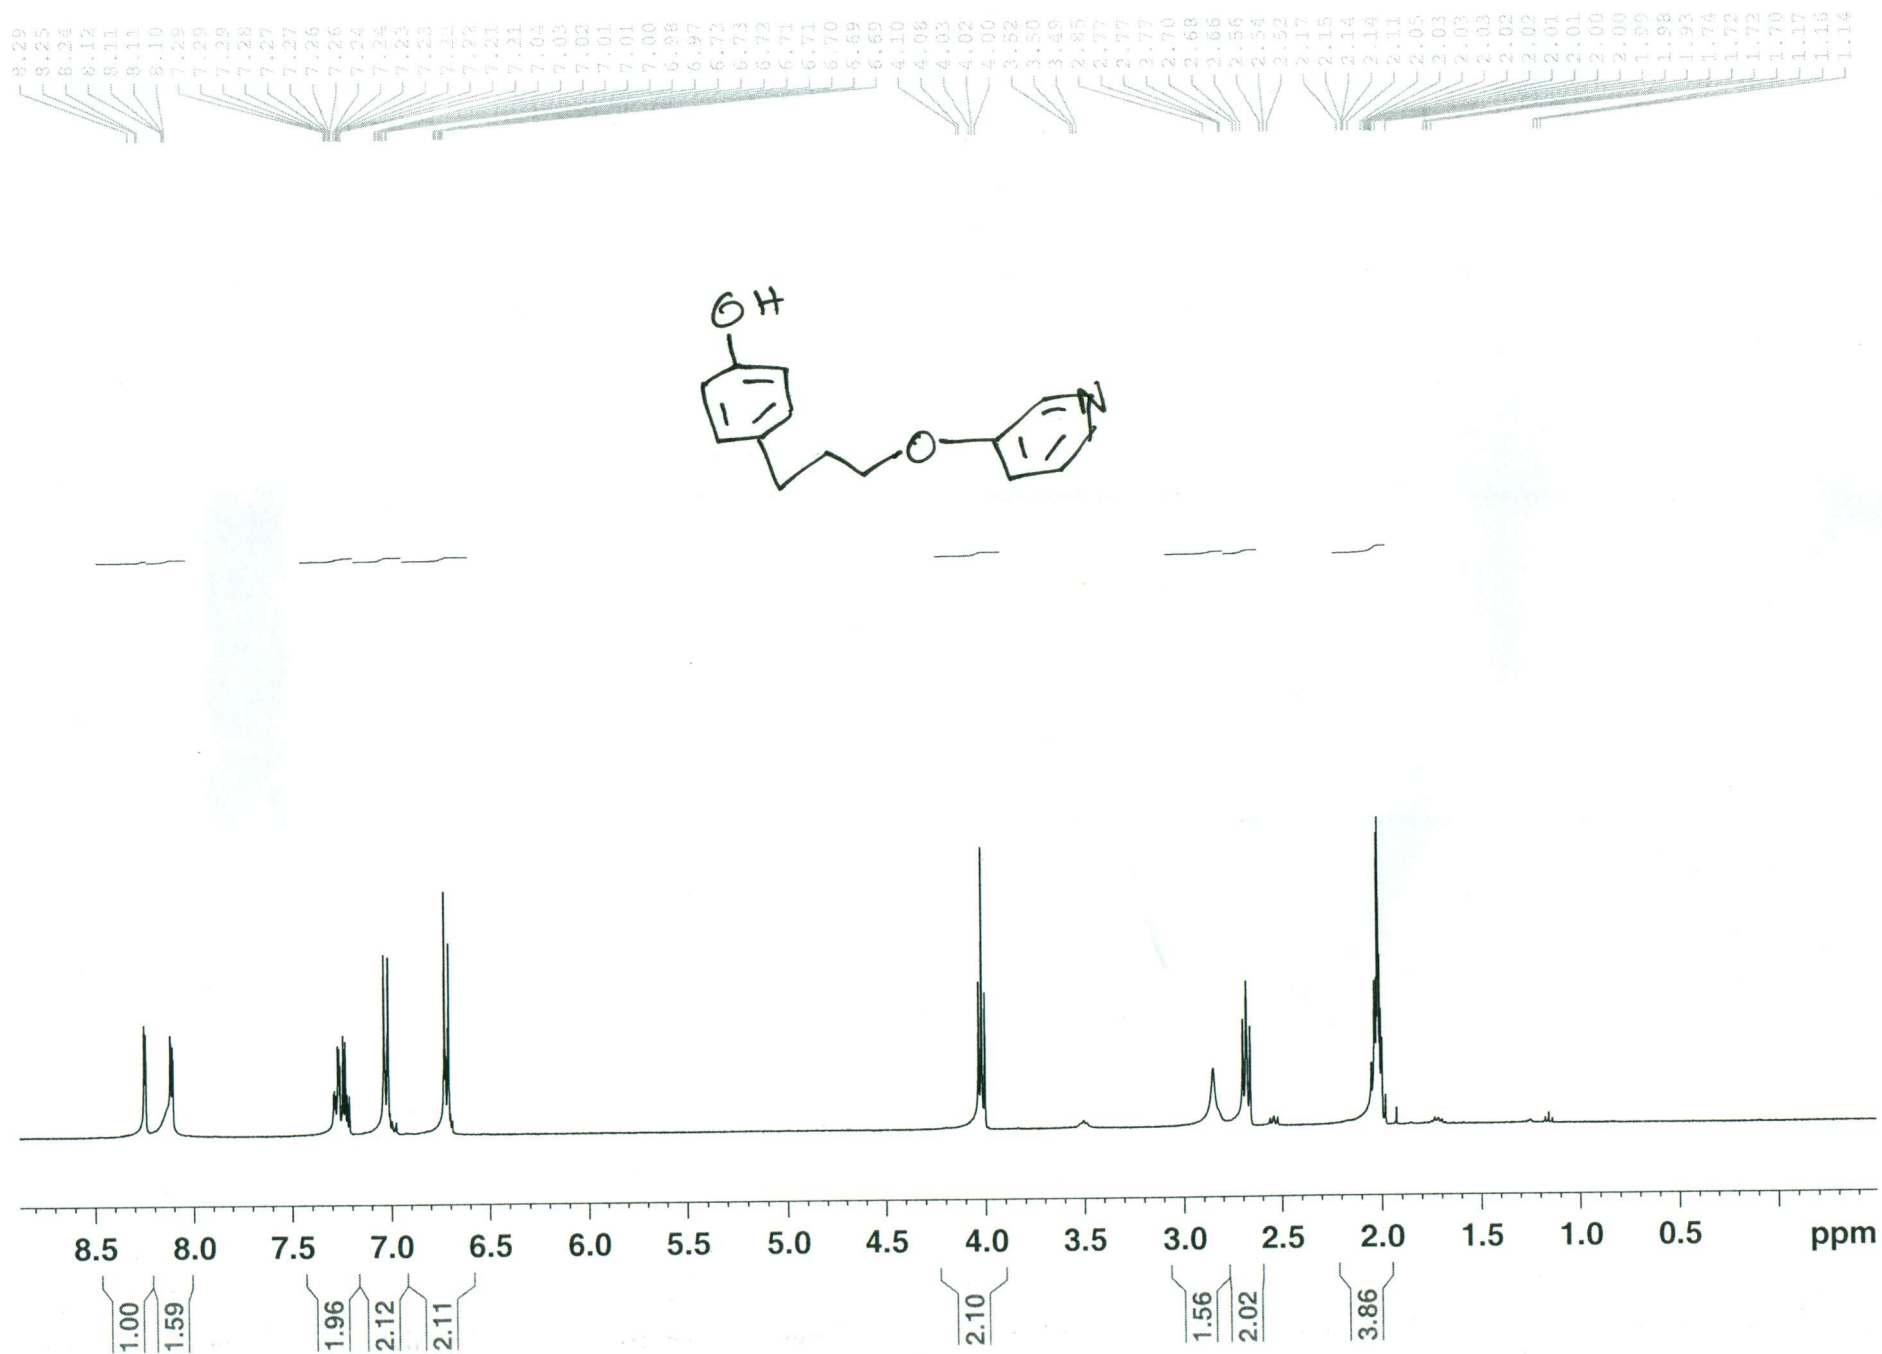



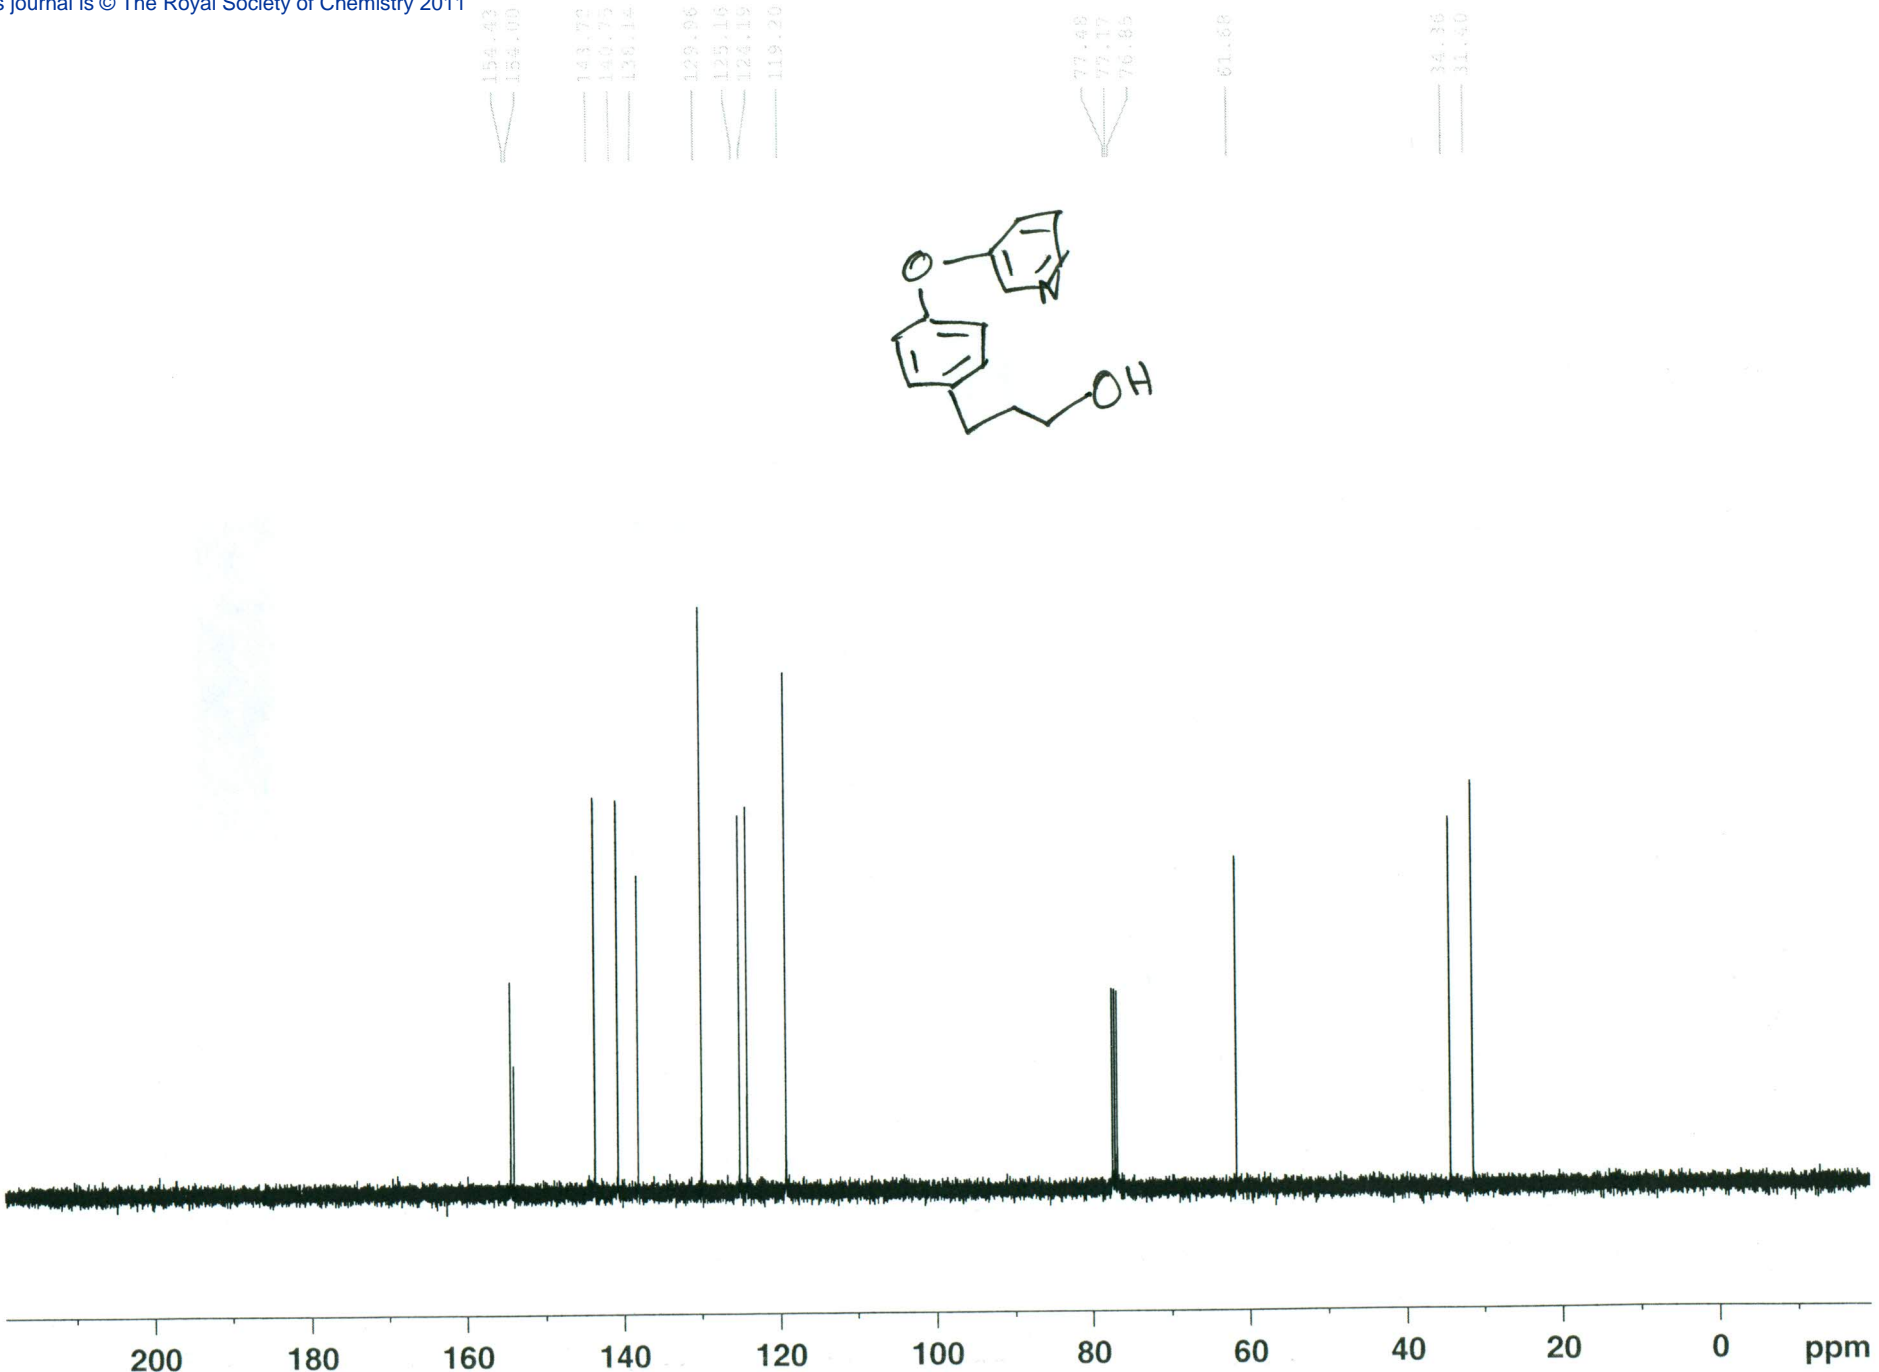

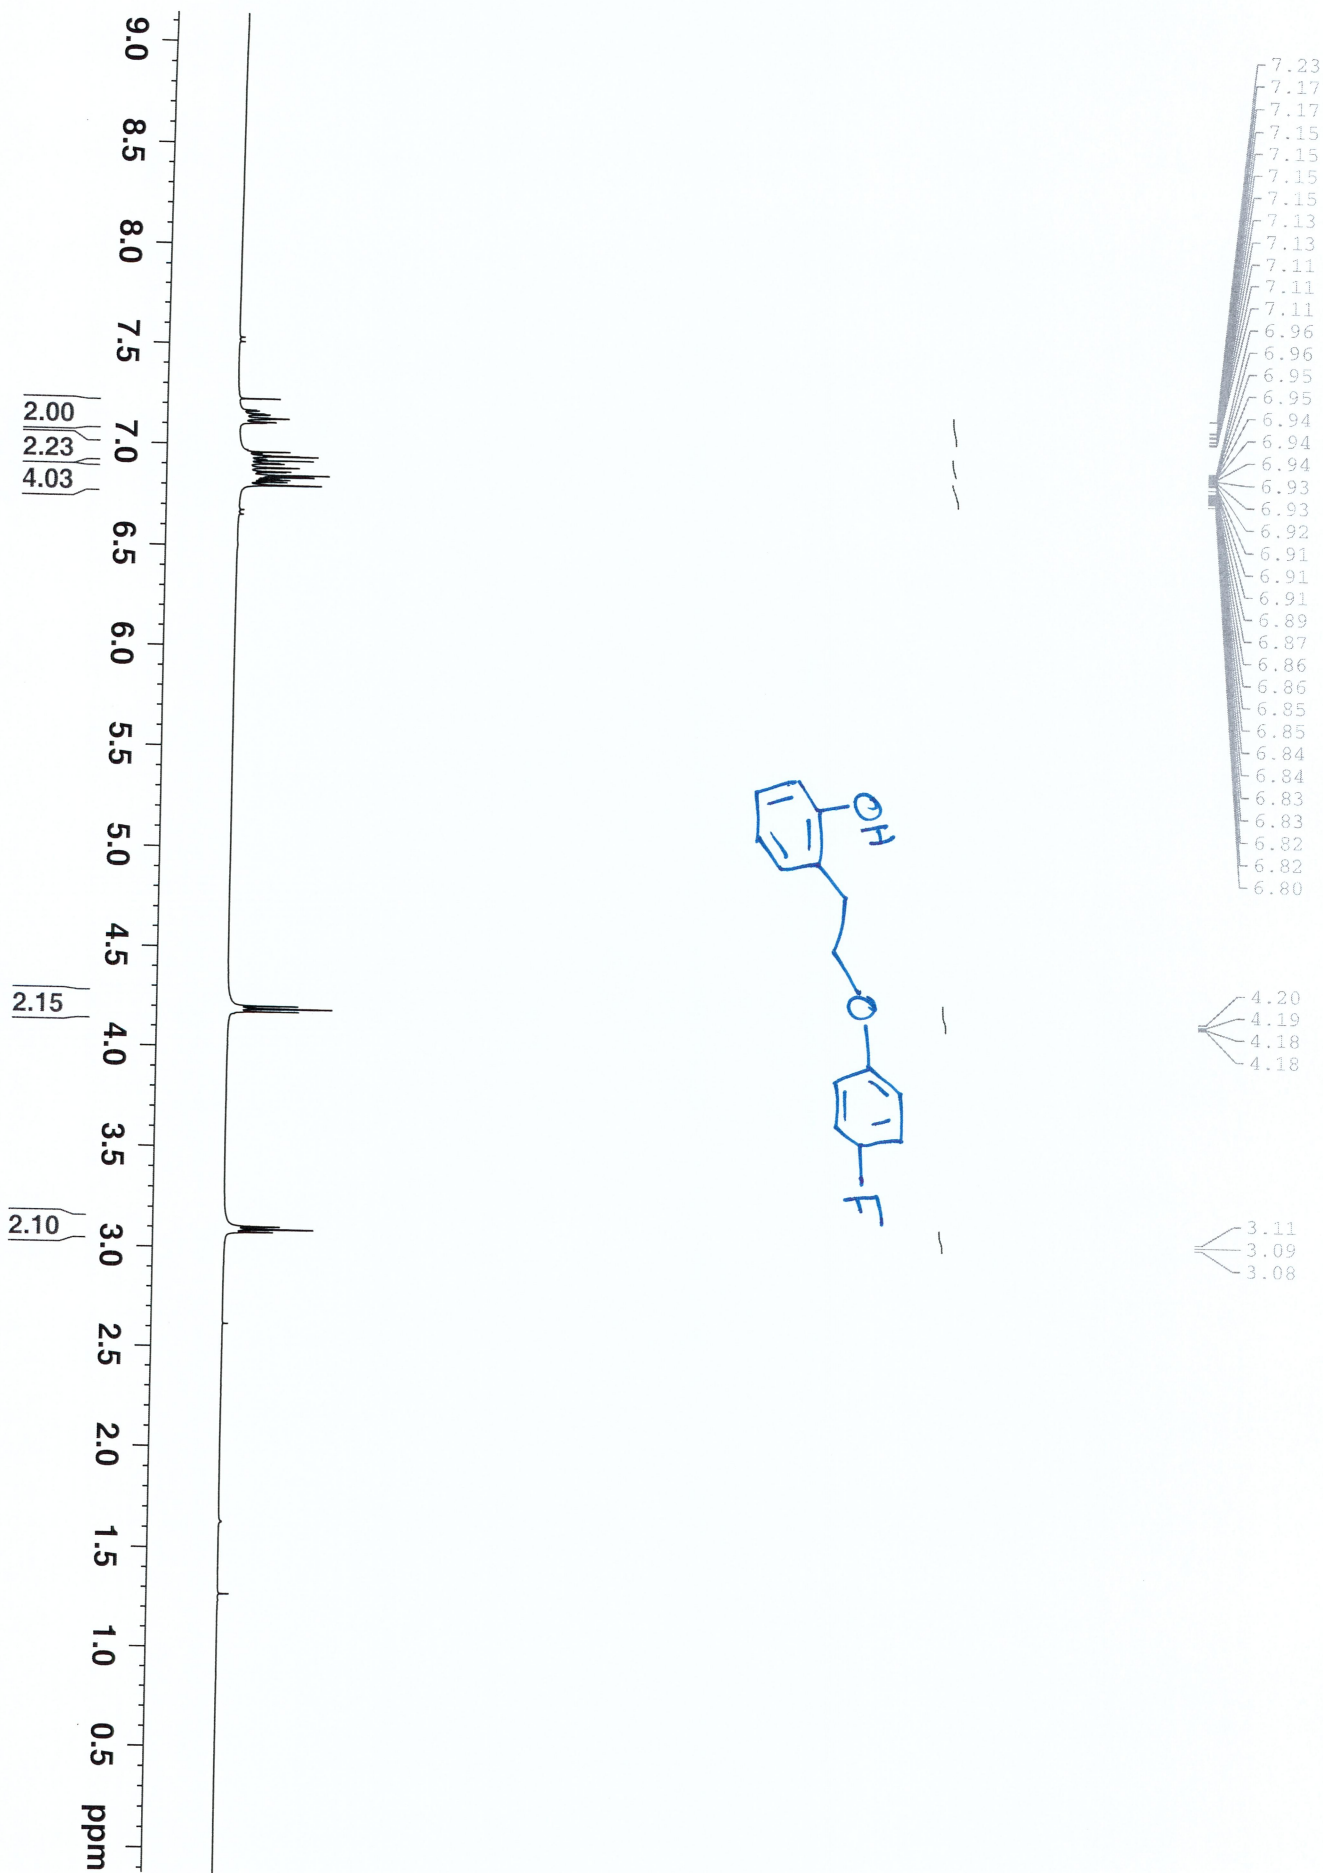

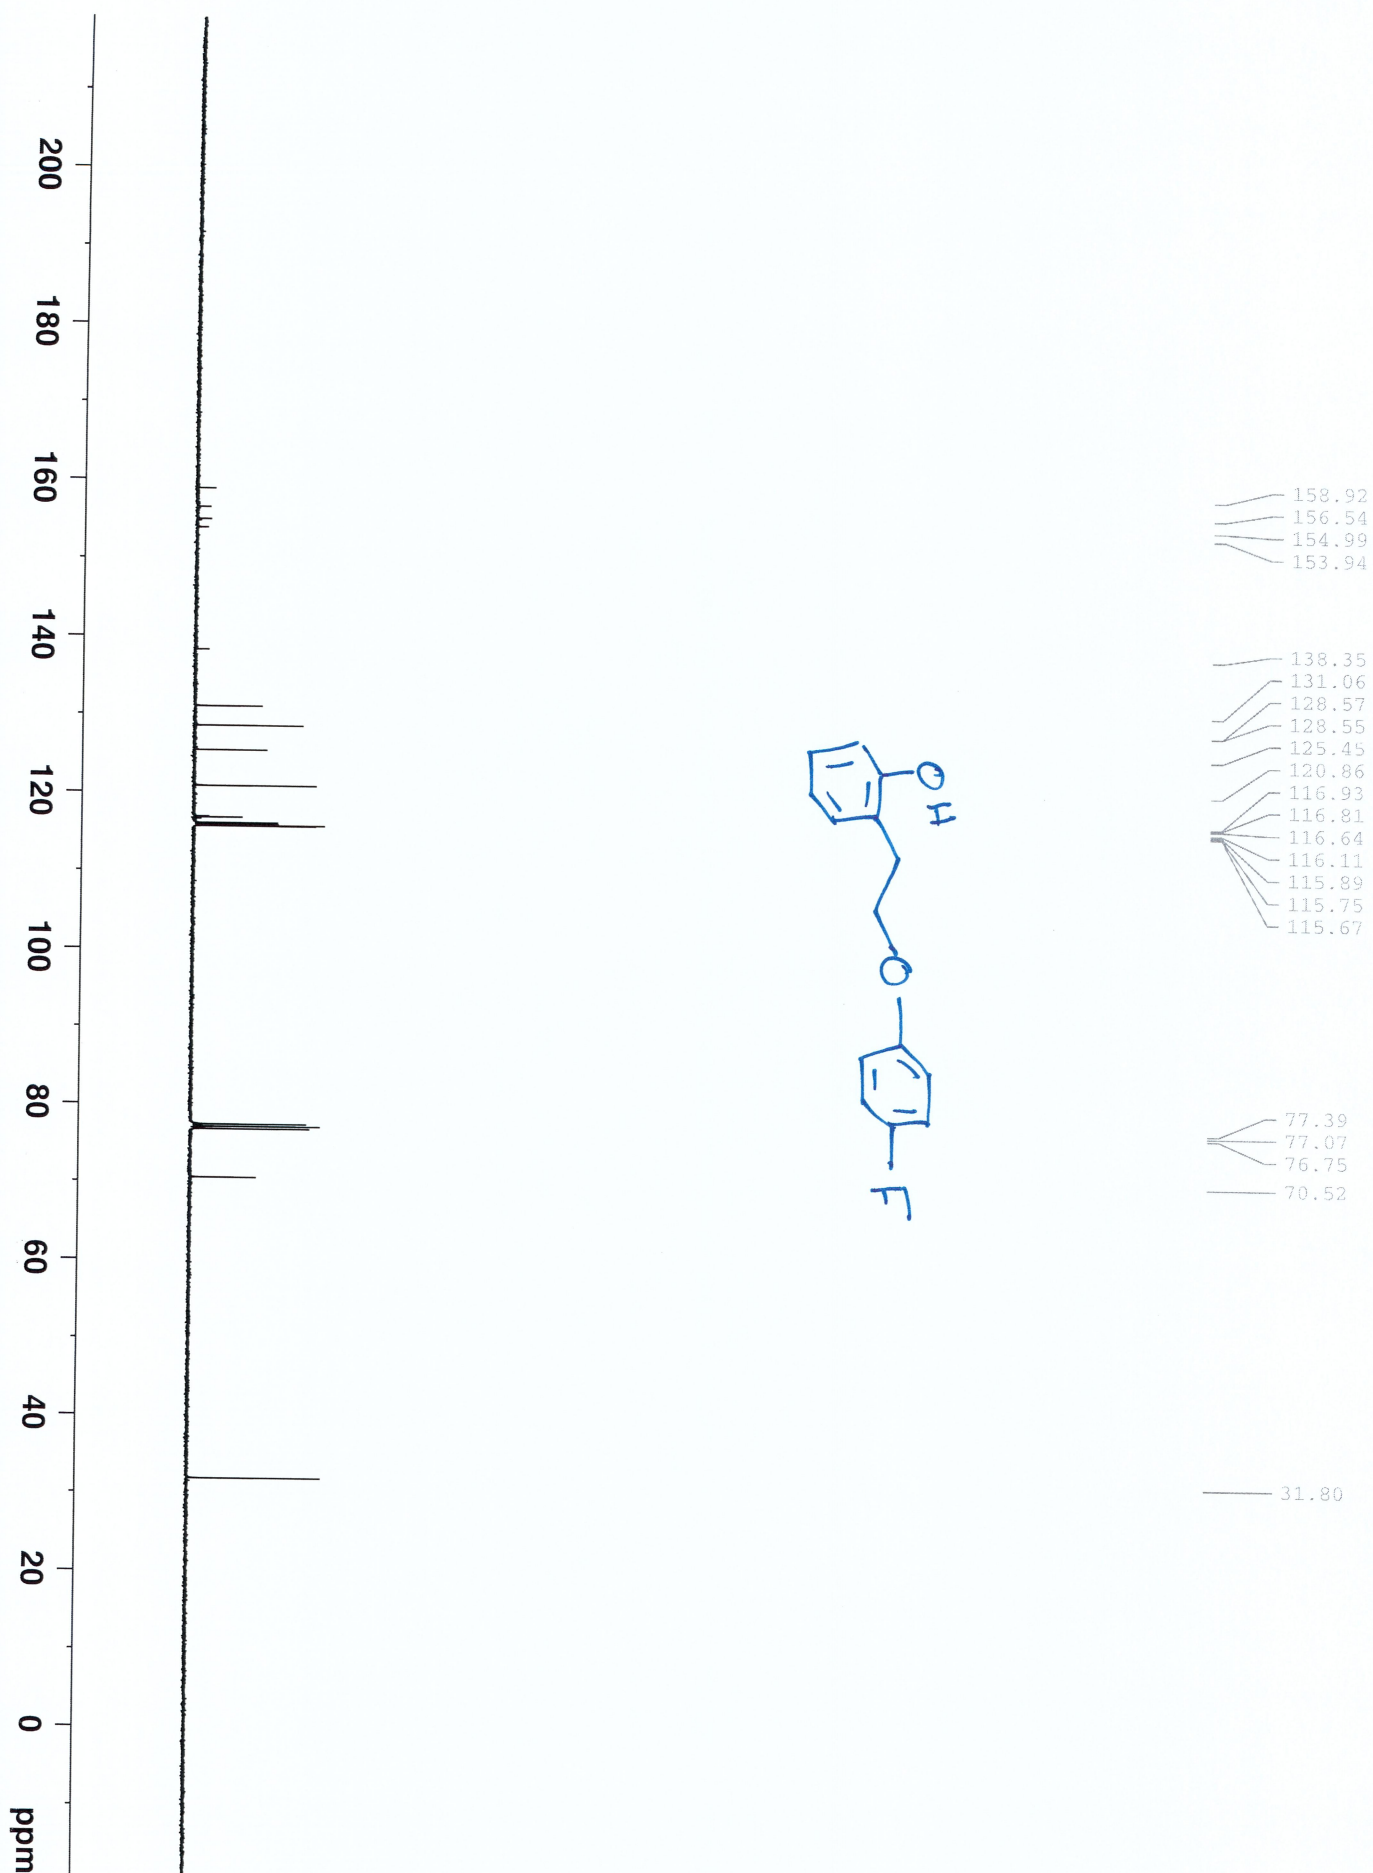



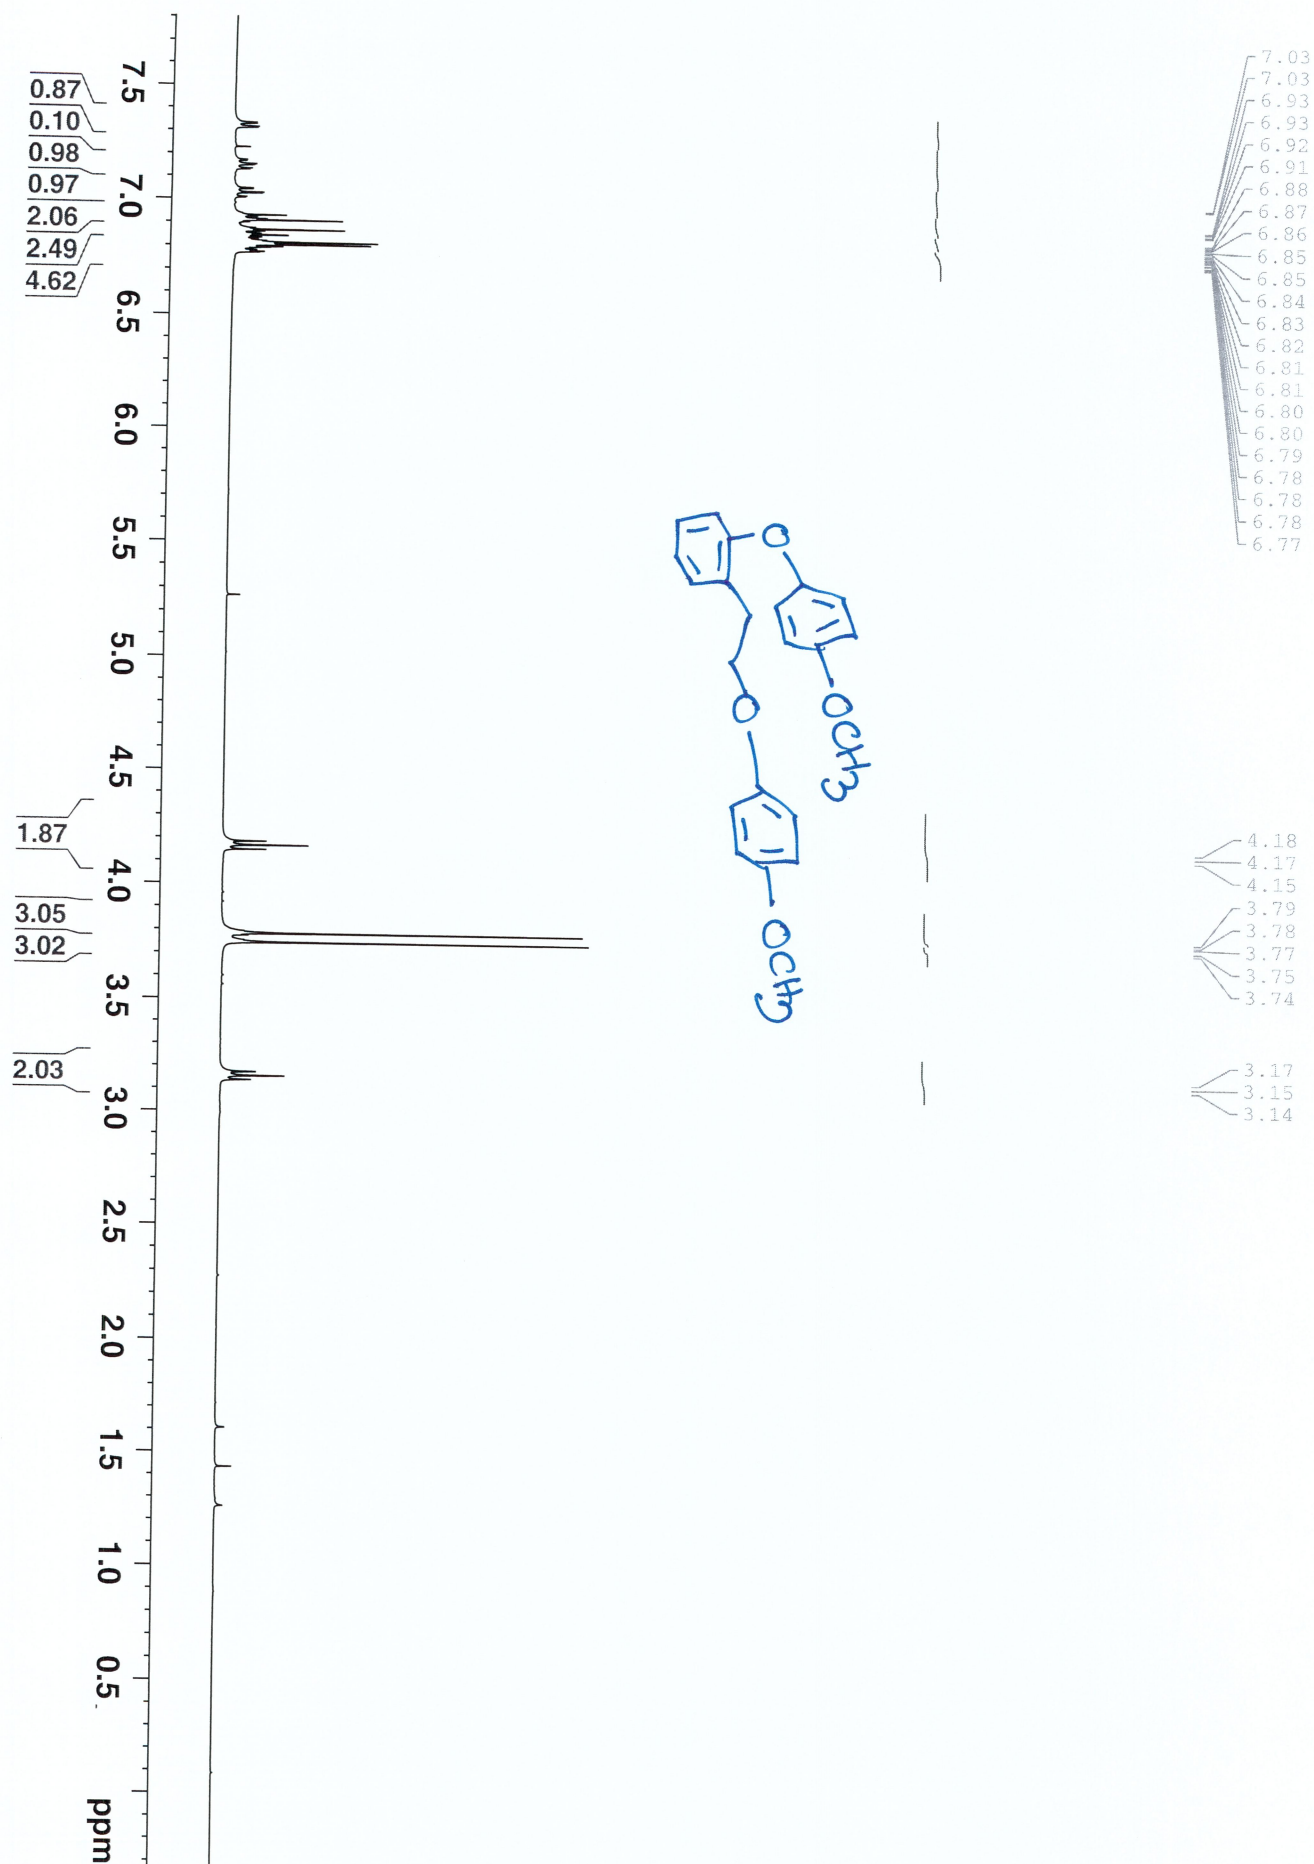

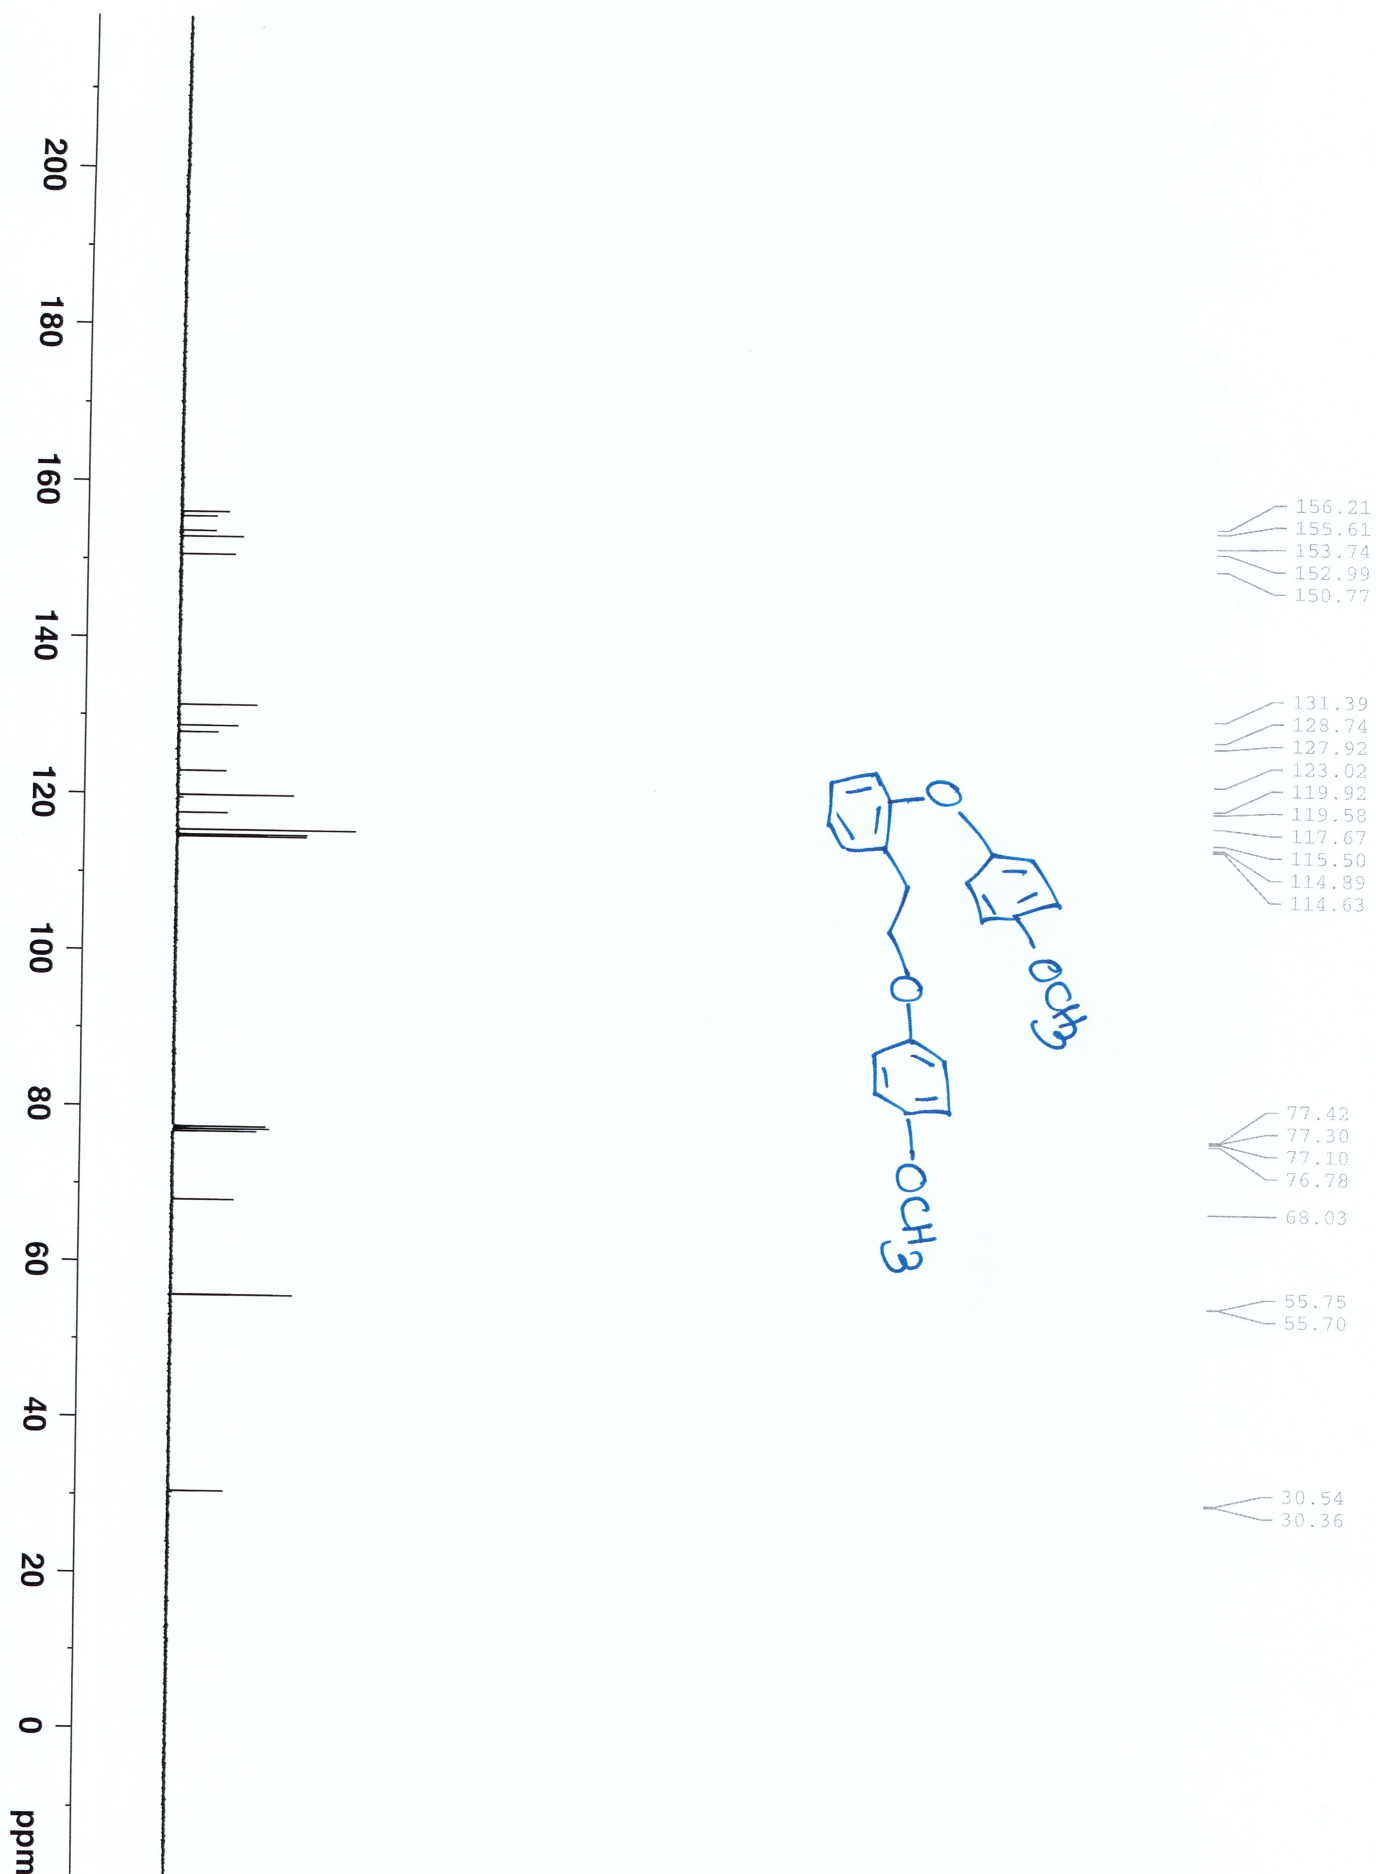

Supplement: c1cc12694f.pdf [file c1cc12694f.pdf]
